# Supplementary material for: Wagner–Meerwein type rearrangement in 5-oxohomoadamantane series
Source: Royal Society of Chemistry journal article supplement (doi:10.1039/c9ob02060h), 2019-12-17
Supplement: c9ob02060h1.pdf [file c9ob02060h1.pdf]

## Supporting Information

### Unexpected transformation of $\alpha$ -substituted 5-oxohomoadamantane-4-carboxylate. Route to 2,4-di and 2,3,4-trisubstituted homoadamantanes.

Ilya M. Tkachenko<sup>1\*</sup>, Polina A. Mankova<sup>1</sup>, Victor B. Rybakov<sup>2</sup>, Evgeniy V. Golovin<sup>1</sup>, Yuri N. Klimochkin<sup>1</sup>

Address: <sup>1</sup>Department of Organic Chemistry, Chemical Technological Faculty, Samara State Technical University, 244 Molodogvardeyskaya st., Samara 443100, Russian Federation. <sup>2</sup>Chemistry Department, Faculty of Chemistry, Moscow State University, 1-3 Leninskie gory, Moscow 119991, Russian Federation

Email: Ilya Tkachenko\* - tkachenko.im@samgtu.ru

\* Corresponding author

#### Contains:

copies of <sup>1</sup>H, <sup>13</sup>C and DEPT NMR spectra of all new compounds, presented in the same order in which they appeared in the experimental part of article; optimization tables for alkylation with ethyl bromoacetate and Michael acceptors.

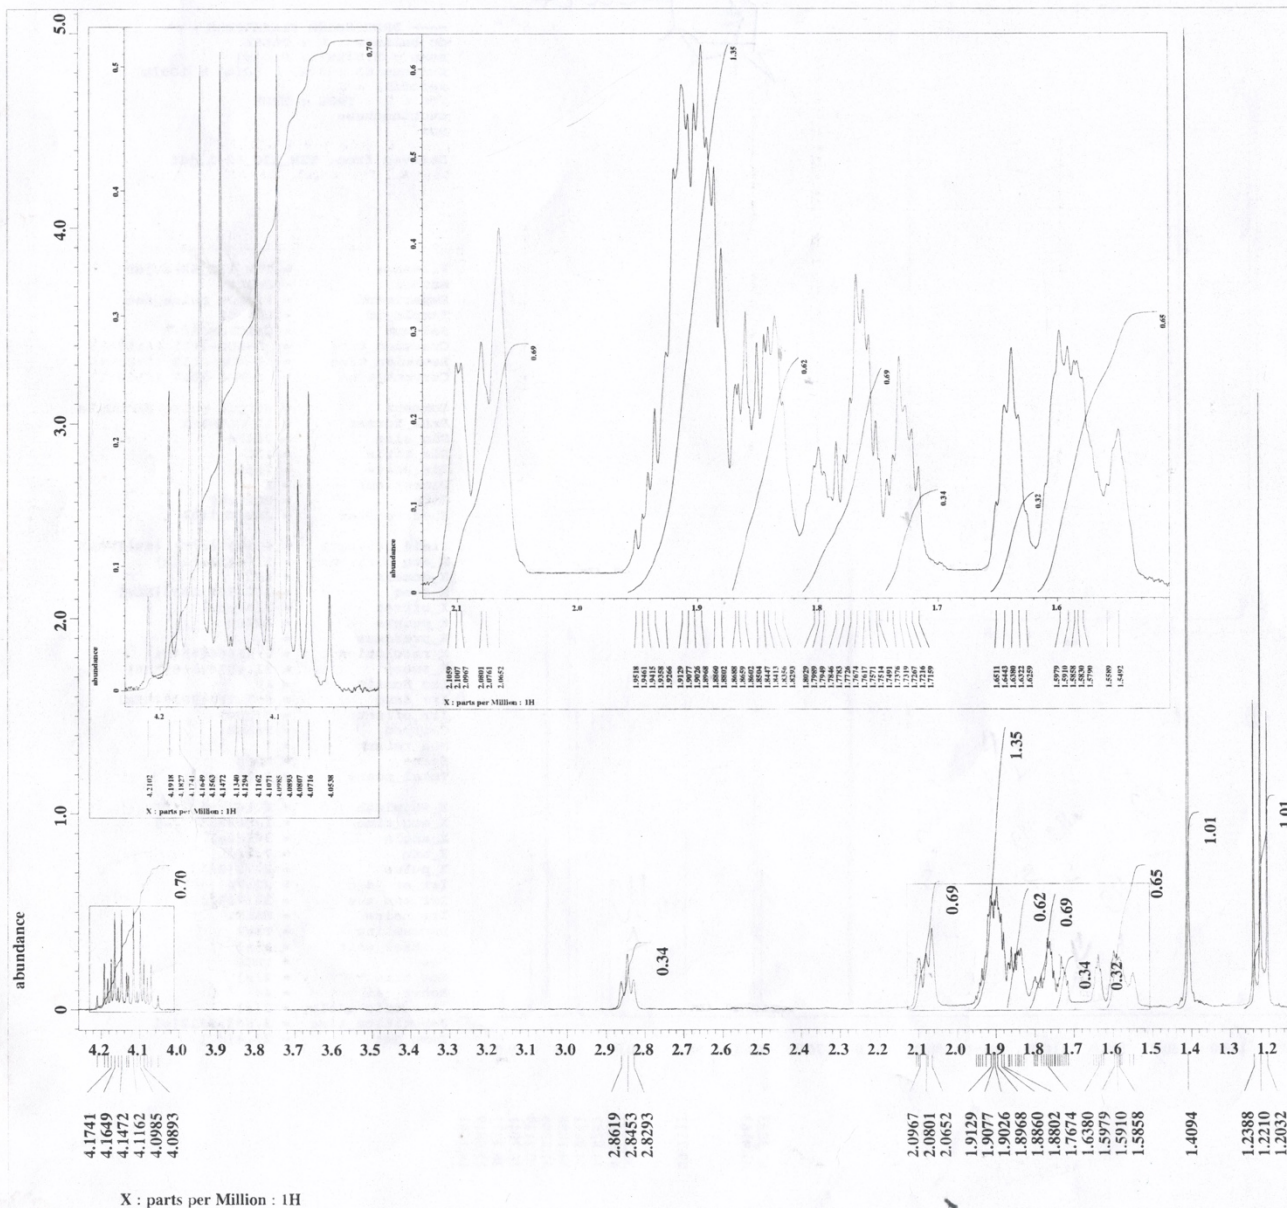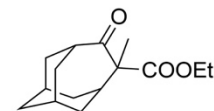

Filename = TIM\_1H\_52-4.jdf  
 Author = delta  
 Experiment = single\_pulse.ex2  
 Sample\_id = TIM\_52  
 Solvent = CHLOROFORM-D  
 Creation\_time = 1-AUG-2017 15:13:41  
 Revision\_time = 1-AUG-2017 17:20:45  
 Current\_time = 1-AUG-2017 17:21:25

Comment = single\_pulse  
 Data\_format = 1D COMPLEX  
 Dim\_size = 26214  
 Dim\_title = 1H  
 Dim\_units = [ppm]  
 Dimensions = X  
 Site = ECX 400  
 Spectrometer = JNM-ECX400

Field\_strength = 9.389766[T] (400[MHz])  
 X\_acq\_duration = 4.36731904[s]  
 X\_domain = 1H  
 X\_freq = 399.78219838[MHz]  
 X\_offset = 7[ppm]  
 X\_points = 32768  
 X\_prescans = 1  
 X\_resolution = 0.22897343[Hz]  
 X\_sweep = 7.5030012[kHz]  
 Irr\_domain = 1H  
 Irr\_freq = 399.78219838[MHz]  
 Irr\_offset = 5[ppm]  
 Tri\_domain = 1H  
 Tri\_freq = 399.78219838[MHz]  
 Tri\_offset = 5[ppm]  
 Clipped = FALSE  
 Mod\_return = 1  
 Scans = 8  
 Total\_scans = 8

X\_90\_width = 11.9[us]  
 X\_acq\_time = 4.36731904[s]  
 X\_angle = 45[deg]  
 X\_atn = 3[dB]  
 X\_pulse = 5.95[us]  
 Irr\_mode = Off  
 Tri\_mode = Off  
 Dante\_presat = FALSE  
 Initial\_wait = 1[s]  
 Recvr\_gain = 62  
 Relaxation\_delay = 5[s]  
 Repetition\_time = 9.36731904[s]  
 Temp\_get = 26.1[dc]



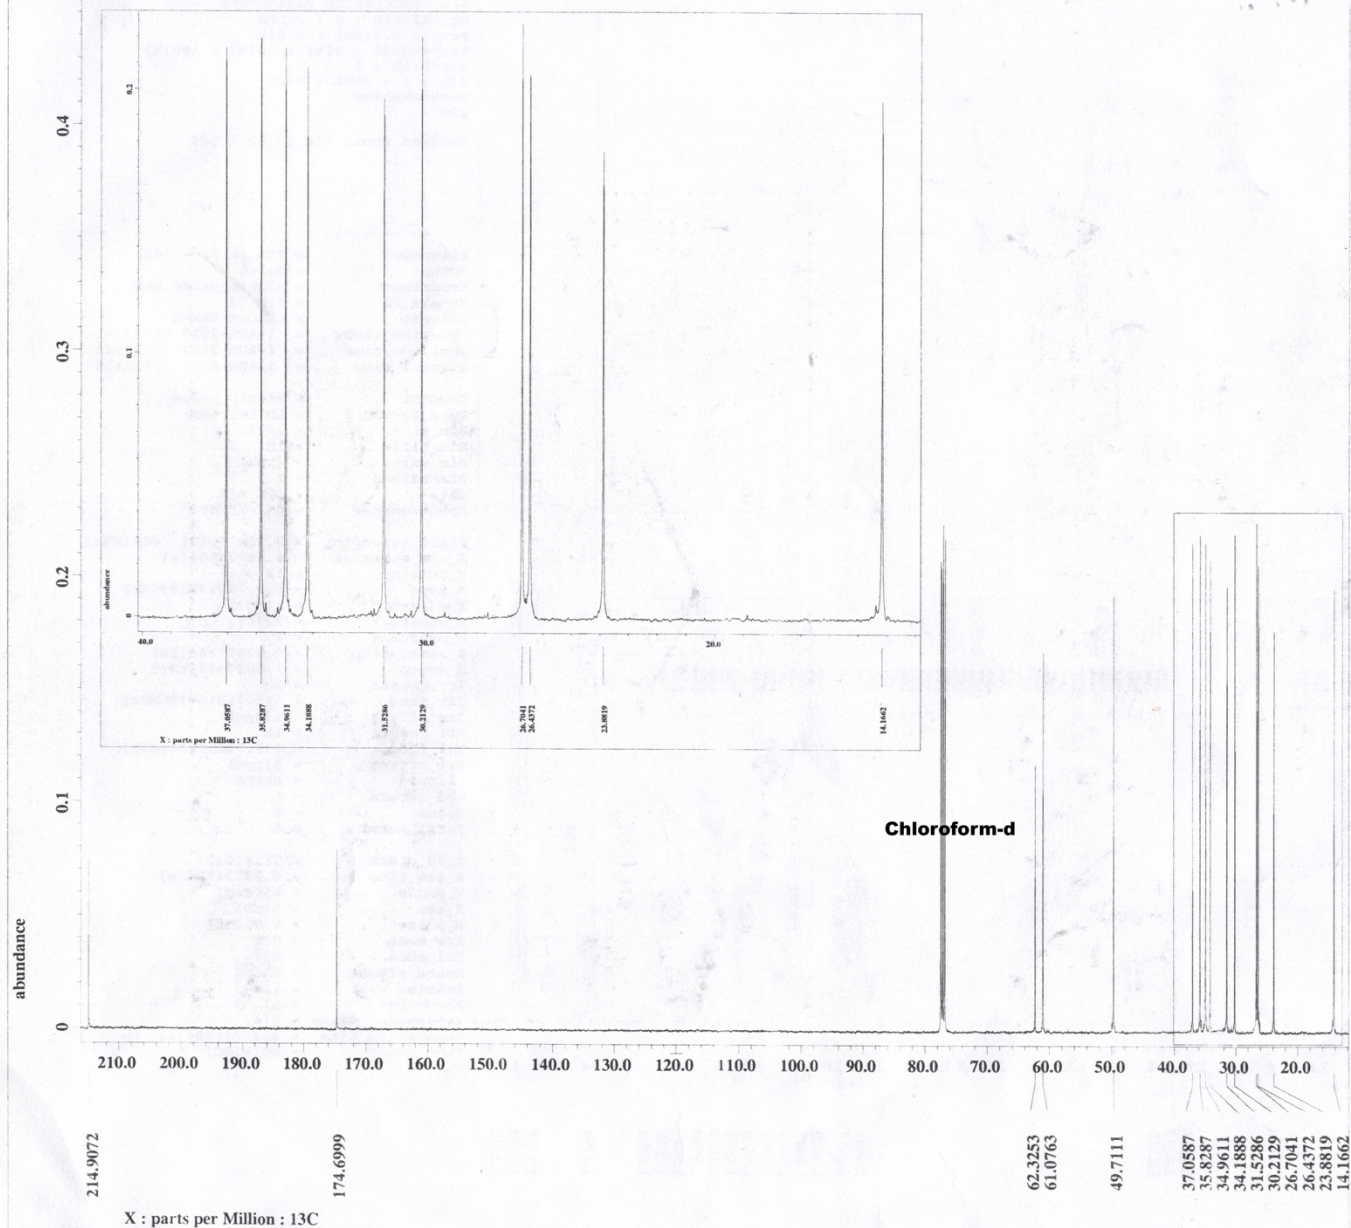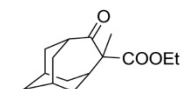

Filename = TIM\_13C\_52-4.jdf  
 Author = delta  
 Experiment = single\_pulse\_dec  
 Sample\_id = TIM\_52  
 Solvent = CHLOROFORM-D  
 Creation\_time = 1-AUG-2017 16:57:53  
 Revision\_time = 1-AUG-2017 17:21:40  
 Current\_time = 1-AUG-2017 17:22:13

Comment = single pulse decouple  
 Data\_format = 1D COMPLEX  
 Dim\_size = 26214  
 Dim\_title = 13C  
 Dim\_units = [ppm]  
 Dimensions = X  
 Site = ECX 400  
 Spectrometer = JNM-ECX400

Field\_strength = 9.389766[T] (400[MHz])  
 X\_acq\_duration = 1.04333312[s]  
 X\_domain = 13C  
 X\_freq = 100.52530333[MHz]  
 X\_offset = 120[ppm]  
 X\_points = 32768  
 X\_prescans = 4  
 X\_resolution = 0.95846665[Hz]  
 X\_sweep = 31.40703518[kHz]  
 Irr\_domain = 1H  
 Irr\_freq = 399.78219838[MHz]  
 Irr\_offset = 5[ppm]  
 Clipped = FALSE  
 Mod\_return = 1  
 Scans = 2000  
 Total\_scans = 2000

X\_90\_width = 8.16[us]  
 X\_acq\_time = 1.04333312[s]  
 X\_angle = 30[deg]  
 X\_atn = 7.8[dB]  
 X\_pulse = 2.72[us]  
 Irr\_atn\_dec = 22.703[dB]  
 Irr\_atn\_noe = 22.703[dB]  
 Irr\_noise = WALTZ  
 Decoupling = TRUE  
 Initial\_wait = 1[s]  
 Noe = TRUE  
 Noe\_time = 2[s]  
 Recvr\_gain = 44  
 Relaxation\_delay = 2[s]  
 Repetition\_time = 3.04333312[s]  
 Temp\_get = 27.4[dc]



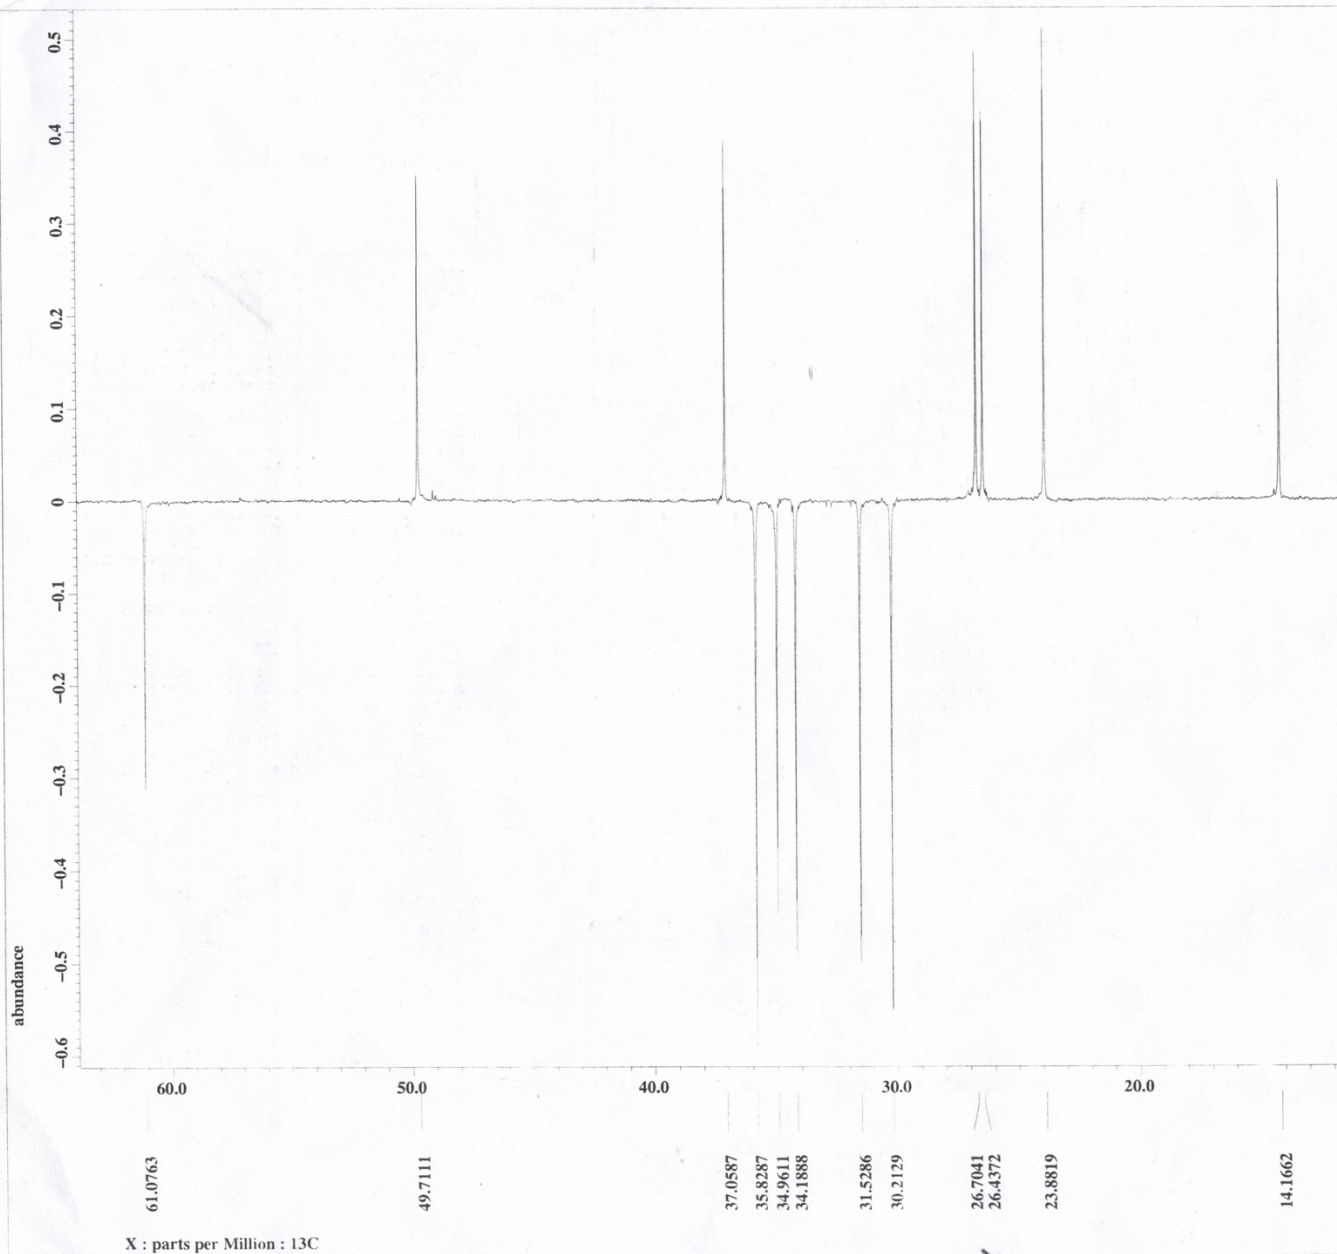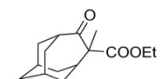

```

Filename      = TIM_DEPT135_52-4.jdf
Author        = delta
Experiment    = dept.ex2
Sample_id     = TIM_52
Solvent       = CHLOROFORM-D
Creation_time  = 1-AUG-2017 17:23:44
Revision_time = 1-AUG-2017 17:22:30
Current_time  = 1-AUG-2017 17:22:36

Comment       = DEPT with decoupling
Data_format   = 1D COMPLEX
Dim_size      = 26214
Dim_title     = 13C
Dim_units     = [ppm]
Dimensions    = X
Site          = ECX 400
Spectrometer  = JNM-ECX400

Field_strength = 9.389766[T] (400[MHz])
X_acq_duration = 1.04333312[s]
X_domain       = 13C
X_freq         = 100.52530333[MHz]
X_offset       = 120[ppm]
X_points       = 32768
X_prescans     = 4
X_resolution   = 0.95846665[Hz]
X_sweep        = 31.40703518[kHz]
Irr_domain     = 1H
Irr_freq       = 399.78219838[MHz]
Irr_offset     = 5[ppm]
Clipped        = TRUE
Mod_return     = 1
Scans          = 500
Total_scans    = 500

X_acq_time     = 1.04333312[s]
X_atn          = 7.8[dB]
X_pulse        = 8.16[us]
Irr_atn        = 3[dB]
Irr_atn_dec    = 22.703[dB]
Irr_noise      = WALTZ
Irr_pulse      = 11.9[us]
Decoupling     = TRUE
Initial_wait   = 1[s]
J_constant     = 140[Hz]
Recvr_gain     = 46
Relaxation_delay = 2[s]
Selection_angle = 135[deg]
Selection_pulse = 17.85[us]
Temp_get       = 27.4[dc]

```



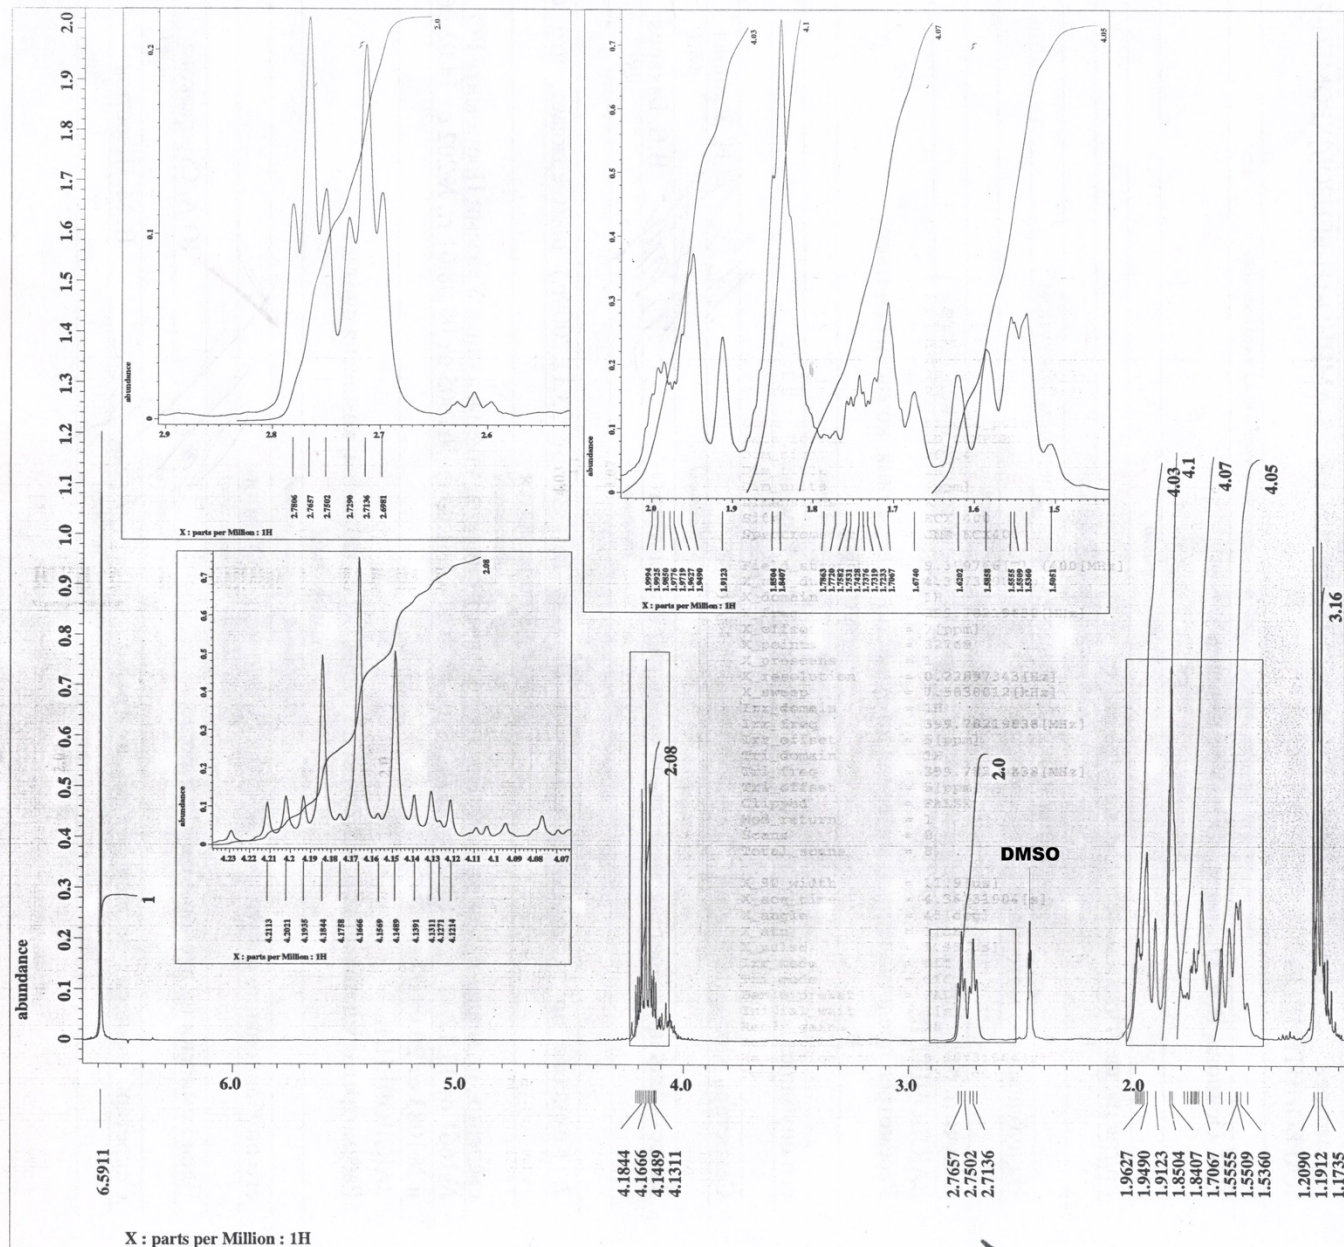

Filename = TIM\_1H\_184-4.jdf  
 Author = delta  
 Experiment = single\_pulse.ex2  
 Sample\_id = TIM\_184  
 Solvent = DMSO-D6  
 Creation\_time = 22-FEB-2019 13:32:23  
 Revision\_time = 22-FEB-2019 13:33:55  
 Current\_time = 22-FEB-2019 13:34:06

Comment = single\_pulse  
 Data\_format = 1D\_COMPLEX  
 Dim\_size = 26214  
 Dim\_title = 1H  
 Dim\_units = [ppm]  
 Dimensions = X  
 Site = ECK 400  
 Spectrometer = JNM-ECK400

Field\_strength = 9.389766[T] (400[MHz])  
 X\_acq\_duration = 4.36731904[s]  
 X\_domain = 1H  
 X\_freq = 399.78219838[MHz]  
 X\_offset = 7[ppm]  
 X\_points = 32768  
 X\_prescans = 1  
 X\_resolution = 0.22897343[Hz]  
 X\_sweep = 7.5030012[kHz]  
 Irr\_domain = 1H  
 Irr\_freq = 399.78219838[MHz]  
 Irr\_offset = 5[ppm]  
 Tri\_domain = 1H  
 Tri\_freq = 399.78219838[MHz]  
 Tri\_offset = 5[ppm]  
 Clipped = FALSE  
 Mod\_return = 1  
 Scans = 8  
 Total\_scans = 8

X\_90\_width = 11.9[us]  
 X\_acq\_time = 4.36731904[s]  
 X\_angle = 45[deg]  
 X\_atn = 3[dB]  
 X\_pulse = 5.95[us]  
 Irr\_mode = Off  
 Tri\_mode = Off  
 Dante\_presat = FALSE  
 Initial\_wait = 1[s]  
 Recvr\_gain = 28  
 Relaxation\_delay = 5[s]  
 Repetition\_time = 9.36731904[s]  
 Temp\_get = 23.4[dc]



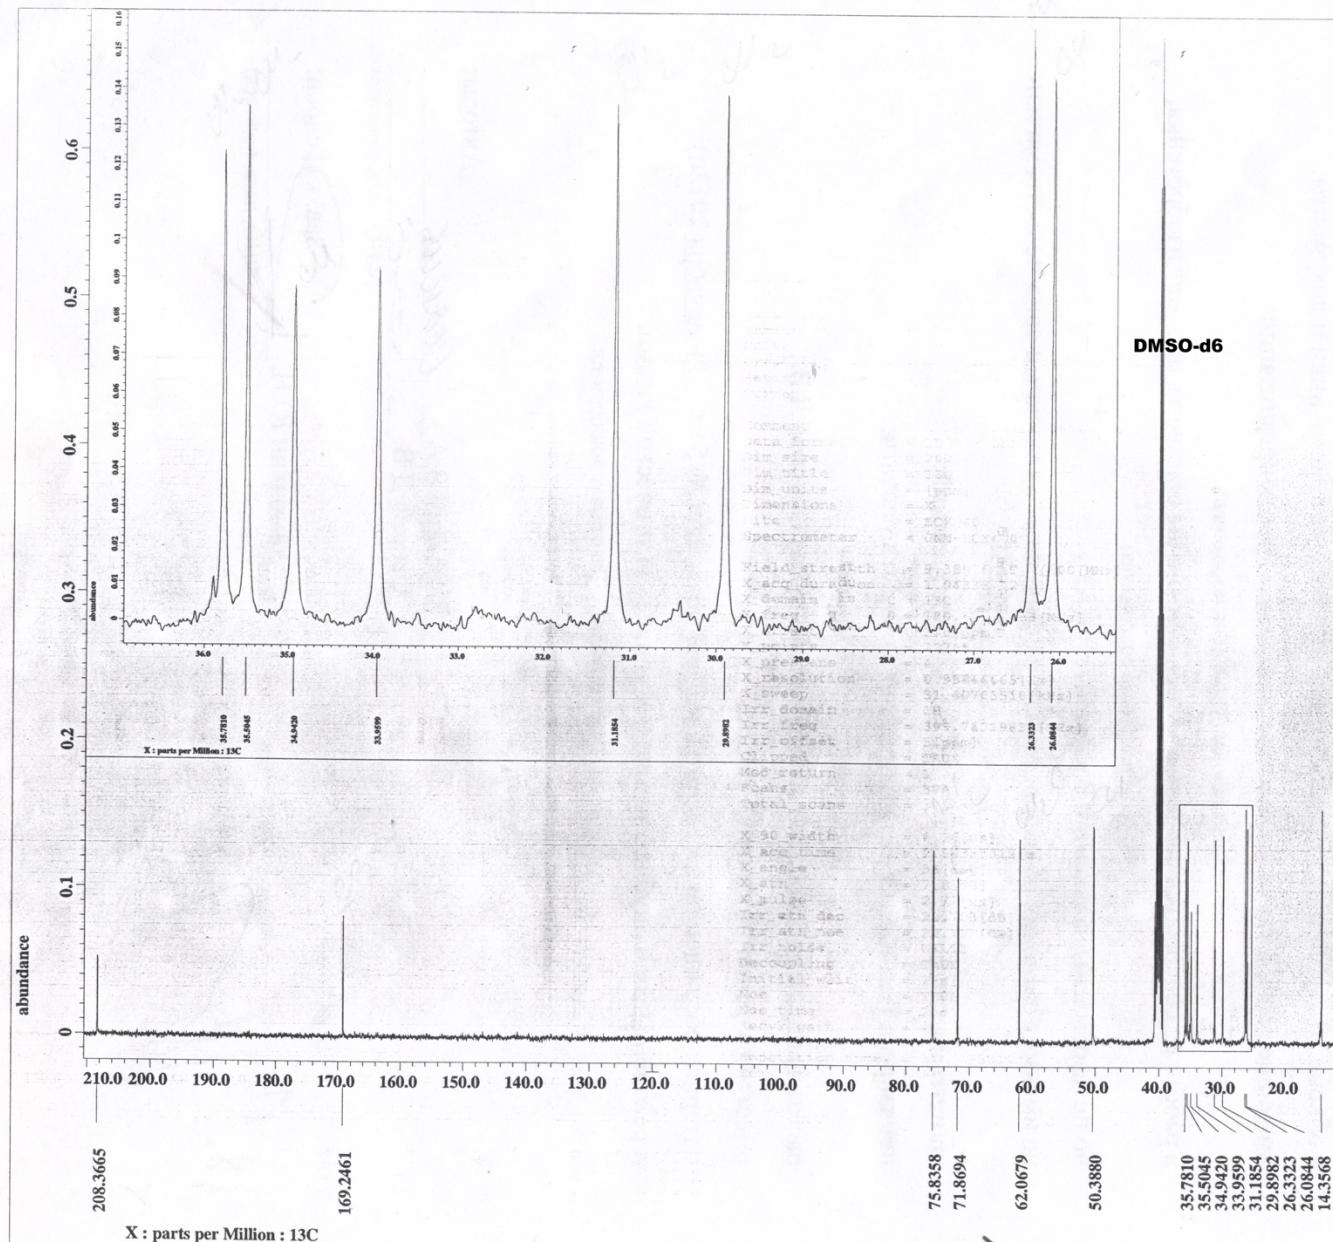

DMSO-d6

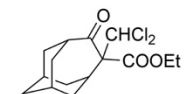

Filename = TIM\_13C\_184-4.jdf  
Author = delta  
Experiment = single\_pulse\_dec  
Sample\_id = TIM\_184  
Solvent = DMSO-D6  
Creation\_time = 22-FEB-2019 13:53:45  
Revision\_time = 22-FEB-2019 13:34:51  
Current\_time = 22-FEB-2019 13:35:04

Comment = single pulse decouple  
Data\_format = 1D COMPLEX  
Dim\_size = 26214  
Dim\_title = 13C  
Dim\_units = [ppm]  
Dimensions = X  
Site = ECK 400  
Spectrometer = JNM-ECK400

Field\_strength = 9.389766[T] (400[MHz])  
X\_acq\_duration = 1.04333312[s]  
X\_domain = 13C  
X\_freq = 100.52530333[MHz]  
X\_offset = 120[ppm]  
X\_points = 32768  
X\_prescans = 4  
X\_resolution = 0.95846665[Hz]  
X\_sweep = 31.40703518[kHz]  
Irr\_domain = 1H  
Irr\_freq = 399.78219838[MHz]  
Irr\_offset = 5[ppm]  
Clipped = TRUE  
Mod\_return = 1  
Scans = 375  
Total\_scans = 375

X\_90\_width = 8.16[us]  
X\_acq\_time = 1.04333312[s]  
X\_angle = 30[deg]  
X\_atn = 7.8[db]  
X\_pulse = 2.72[us]  
Irr\_atn\_dec = 22.703[db]  
Irr\_atn\_noe = 22.703[db]  
Irr\_noise = WALTZ  
Decoupling = TRUE  
Initial\_wait = 1[s]  
Noe = TRUE  
Noe\_time = 2[s]  
Recvr\_gain = 46  
Relaxation\_delay = 2[s]  
Repetition\_time = 3.04333312[s]  
Temp\_get = 24[dc]



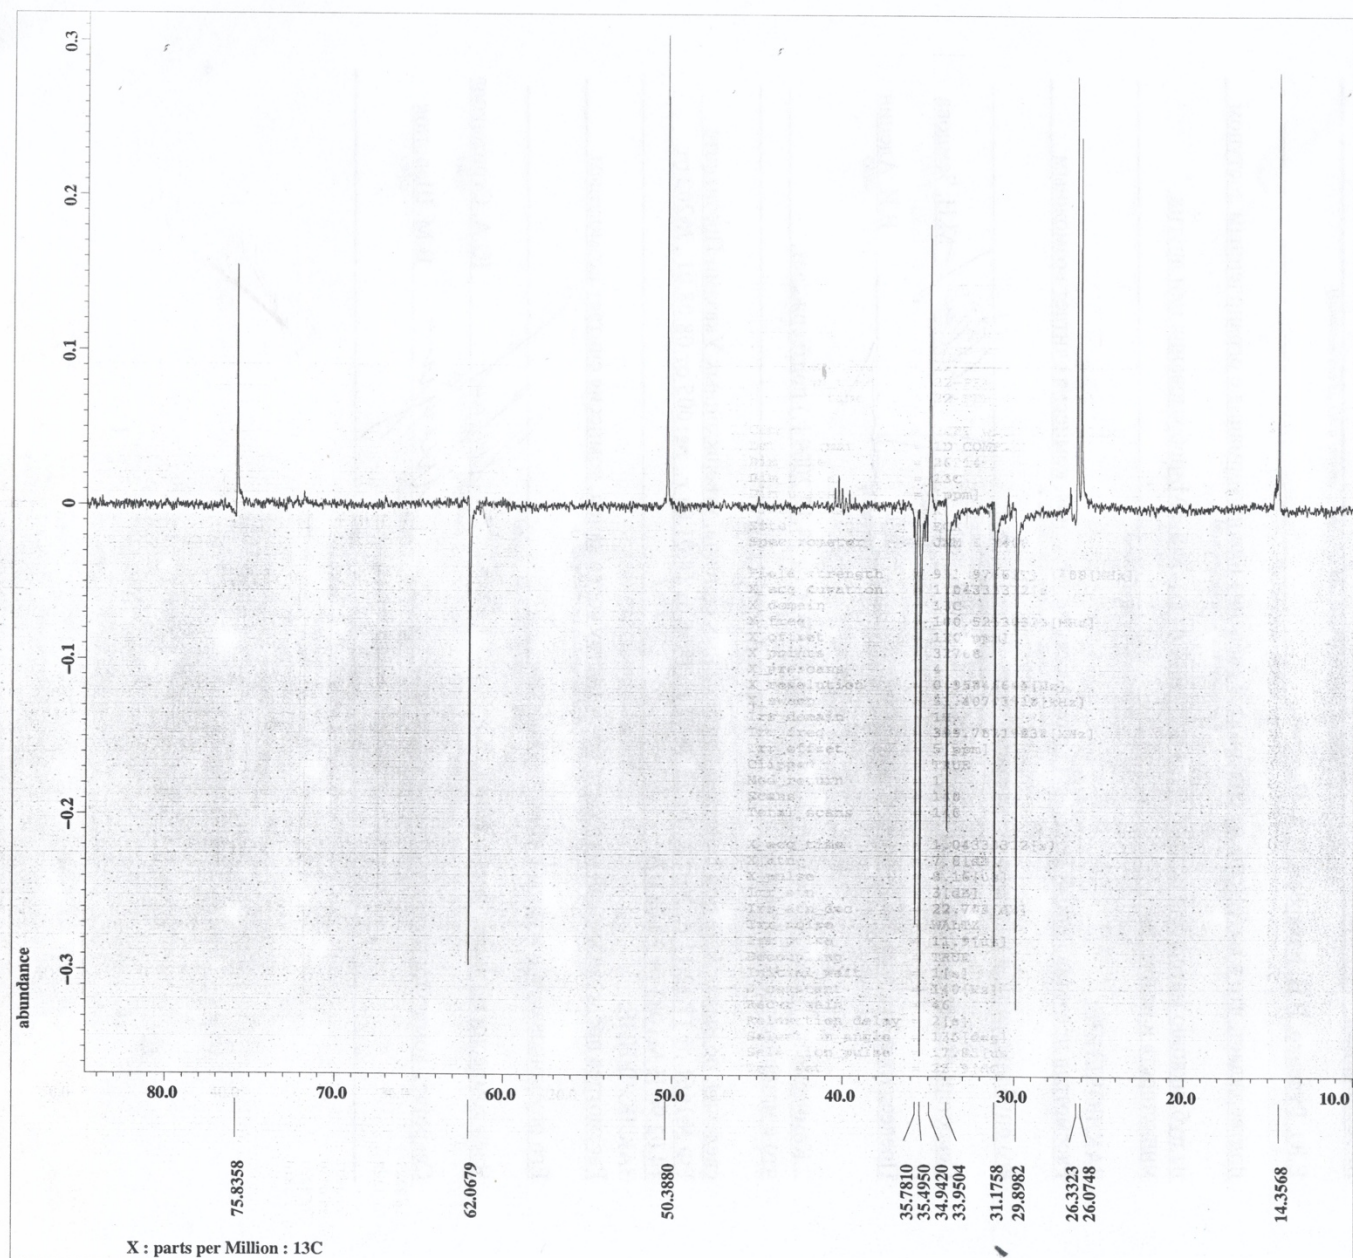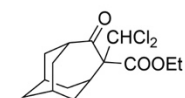

Filename = TIM\_DEPT135\_184-5.jdf  
Author = delta  
Experiment = dept.ex2  
Sample\_id = TIM\_184  
Solvent = DMSO-D6  
Creation\_time = 22-FEB-2019 14:01:13  
Revision\_time = 22-FEB-2019 13:35:18  
Current\_time = 22-FEB-2019 13:35:21

Comment = DEPT with decoupling  
Data\_format = 1D COMPLEX  
Dim\_size = 26214  
Dim\_title = 13C  
Dim\_units = [ppm]  
Dimensions = X  
Site = ECX 400  
Spectrometer = JNM-ECX400

Field\_strength = 9.389766 [T] (400 [MHz])  
X\_acq\_duration = 1.0433312 [s]  
X\_domain = 13C  
X\_freq = 100.5230333 [MHz]  
X\_offset = 120 [ppm]  
X\_points = 32768  
X\_prescans = 4  
X\_resolution = 0.95846665 [Hz]  
X\_sweep = 31.40703518 [kHz]  
Irr\_domain = 1H  
Irr\_freq = 399.78219838 [MHz]  
Irr\_offset = 5 [ppm]  
Clipped = TRUE  
Mod\_return = 1  
Scans = 140  
Total\_scans = 140

X\_acq\_time = 1.0433312 [s]  
X\_atn = 7.8 [dB]  
X\_pulse = 8.16 [us]  
Irr\_atn = 3 [dB]  
Irr\_atn\_dec = 22.703 [dB]  
Irr\_noise = WALTZ  
Irr\_pulse = 11.9 [us]  
Decoupling = TRUE  
Initial\_wait = 1 [s]  
J\_constant = 140 [Hz]  
Recvr\_gain = 46  
Relaxation\_delay = 2 [s]  
Selection\_angle = 135 [deg]  
Selection\_pulse = 17.85 [us]  
Temp\_get = 23.9 [degC]



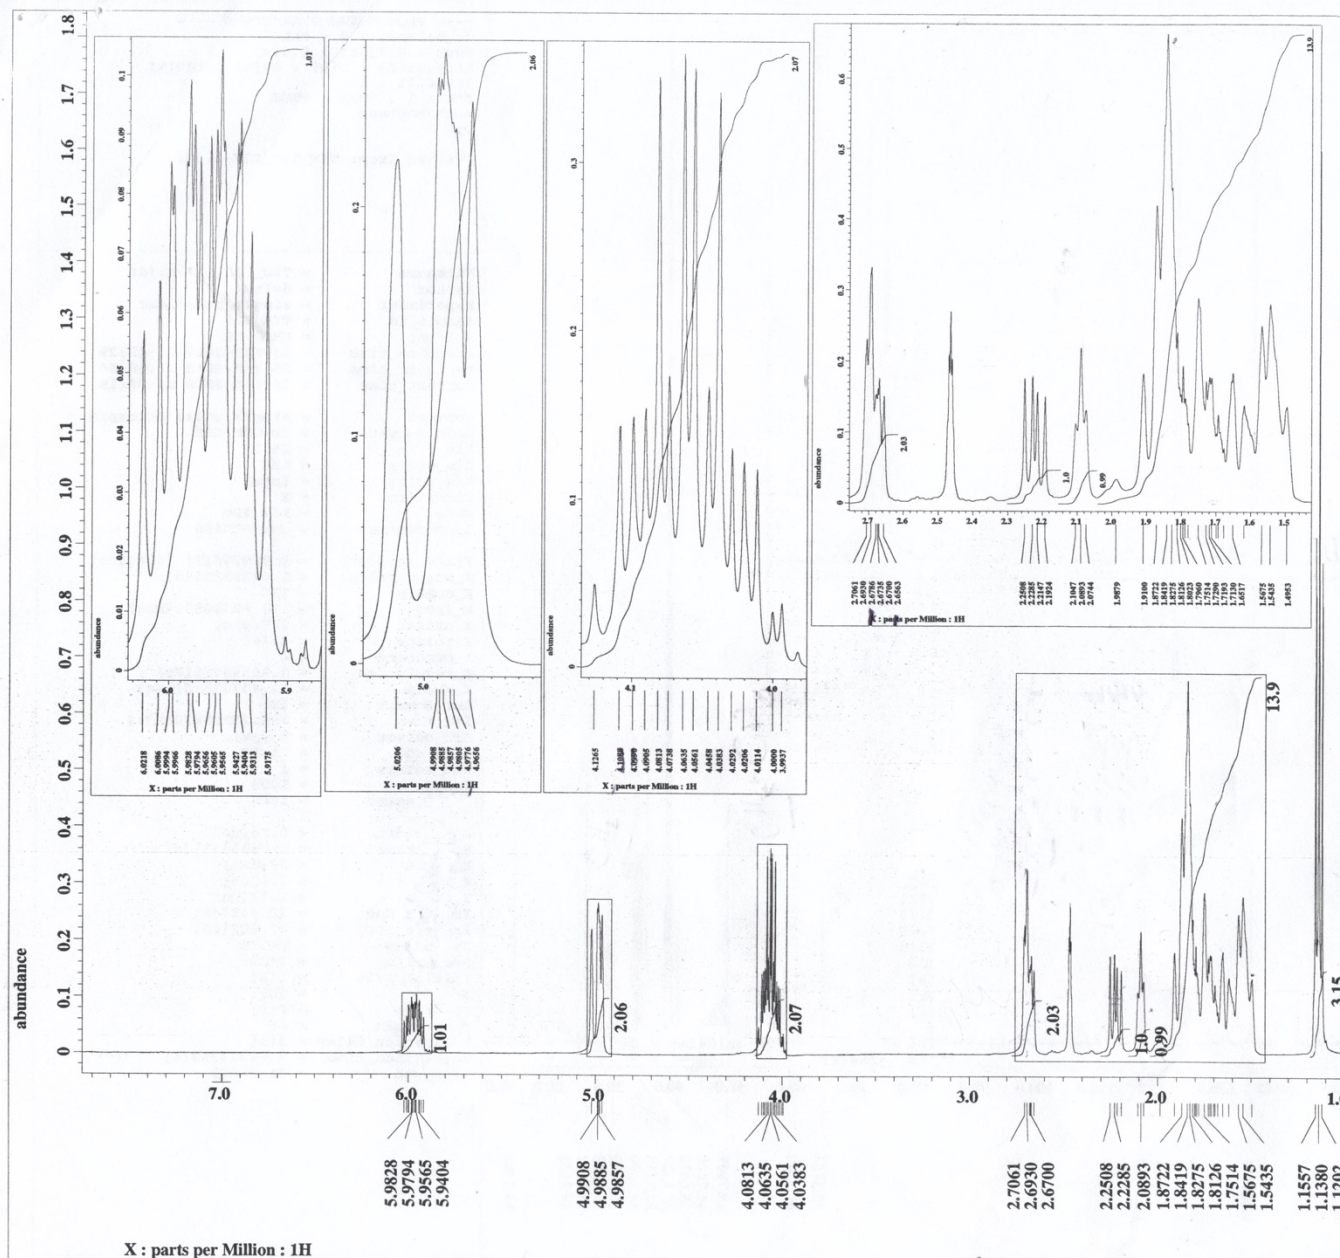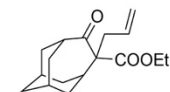

Filename = TIM\_1H\_117-5.jdf  
 Author = delta  
 Experiment = single\_pulse.ex2  
 Sample\_id = TIM\_117  
 Solvent = DMSO-D6  
 Creation\_time = 15-MAR-2018 22:49:16  
 Revision\_time = 16-MAR-2018 16:03:32  
 Current\_time = 16-MAR-2018 16:04:41

Comment = single\_pulse  
 Data\_format = 1D COMPLEX  
 Dim\_size = 26214  
 Dim\_title = 1H  
 Dim\_units = [ppm]  
 Dimensions = X  
 Site = ECX 400  
 Spectrometer = JNM-ECX400

Field\_strength = 9.389766[T] (400[MHz])  
 X\_acq\_duration = 4.36731904[s]  
 X\_domain = 1H  
 X\_freq = 399.78219838[MHz]  
 X\_offset = 7[ppm]  
 X\_points = 32768  
 X\_prescans = 1  
 X\_resolution = 0.22897343[Hz]  
 X\_sweep = 7.5030012[kHz]  
 Irr\_domain = 1H  
 Irr\_freq = 399.78219838[MHz]  
 Irr\_offset = 5[ppm]  
 Tri\_domain = 1H  
 Tri\_freq = 399.78219838[MHz]  
 Tri\_offset = 5[ppm]  
 Clipped = FALSE  
 Mod\_return = 1  
 Scans = 8  
 Total\_scans = 8

X\_90\_width = 11.9[us]  
 X\_acq\_time = 4.36731904[s]  
 X\_angle = 45[deg]  
 X\_atn = 3[dB]  
 X\_pulse = 5.95[us]  
 Irr\_mode = Off  
 Tri\_mode = Off  
 Dante\_presat = FALSE  
 Initial\_wait = 1[s]  
 Recvr\_gain = 30  
 Relaxation\_delay = 5[s]  
 Repetition\_time = 9.36731904[s]  
 Temp\_get = 21.7[dc]



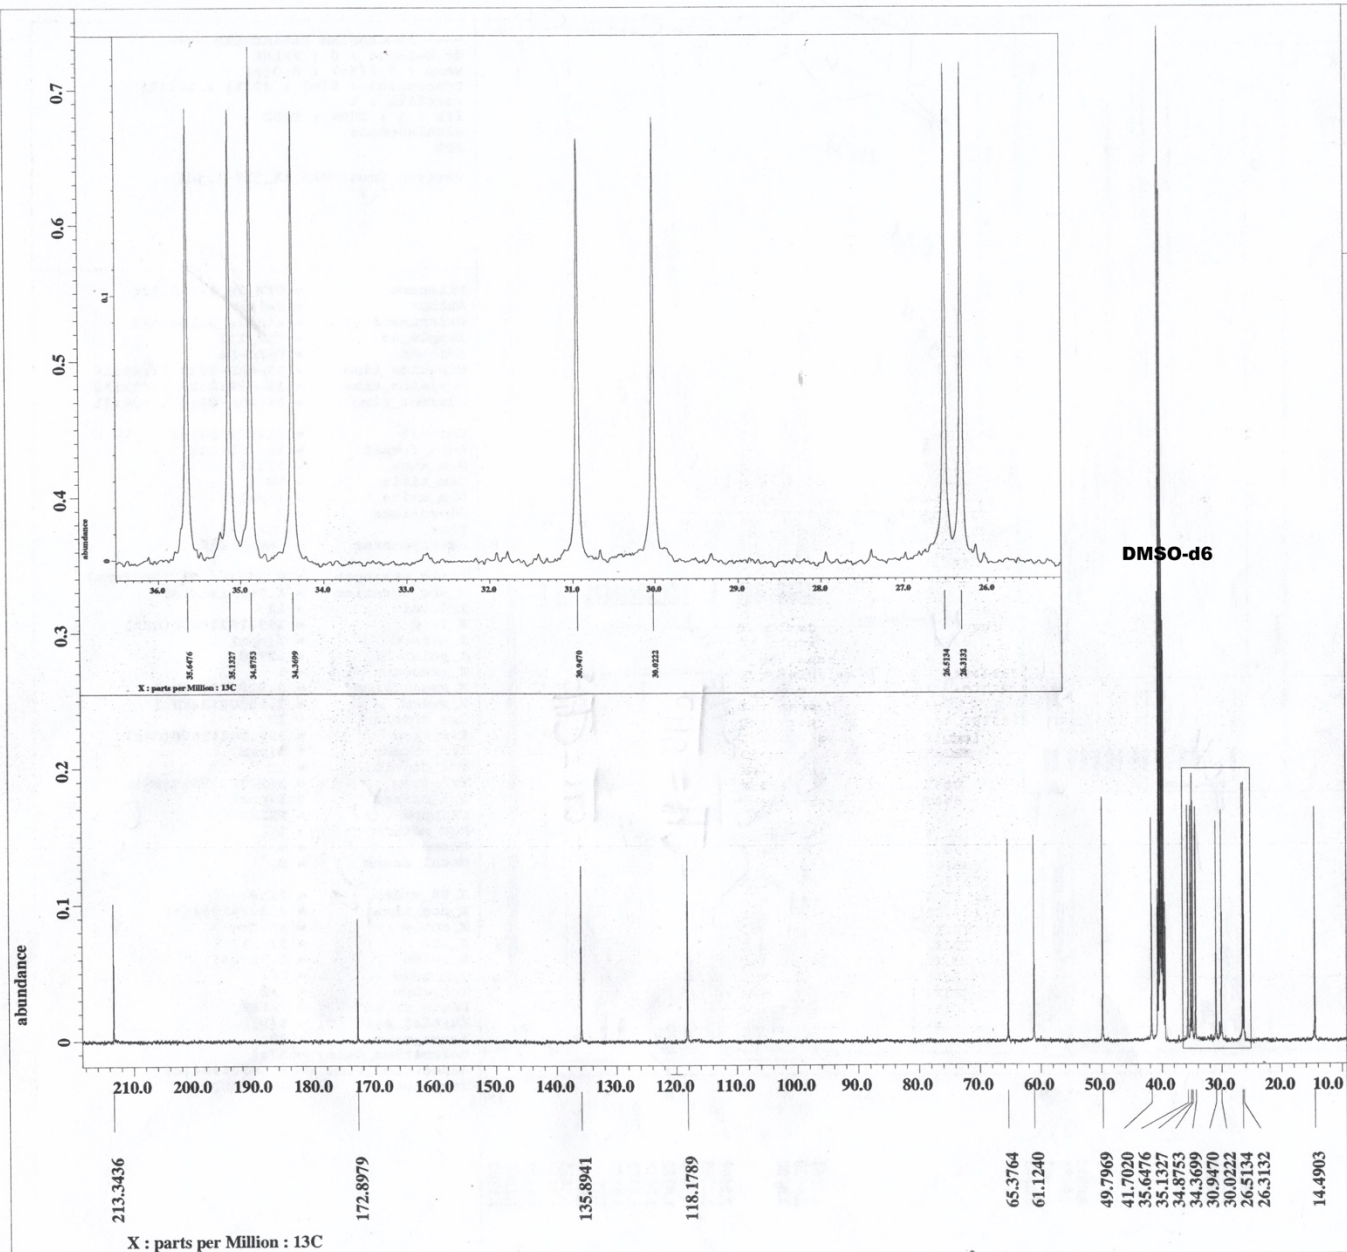

DMSO-d6

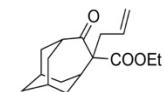

Filename = TIM\_13C\_117-4.jdf  
Author = delta  
Experiment = single\_pulse\_dec  
Sample\_id = TIM\_117  
Solvent = DMSO-D6  
Creation\_time = 15-MAR-2018 23:42:29  
Revision\_time = 16-MAR-2018 16:04:54  
Current\_time = 16-MAR-2018 16:05:15

Comment = single pulse decouple  
Data\_format = 1D COMPLEX  
Dim\_size = 26214  
Dim\_title = 13C  
Dim\_units = [ppm]  
Dimensions = X  
Site = ECX 400  
Spectrometer = JNM-ECX400

Field\_strength = 9.389766[T] (400[MHz])  
X\_acq\_duration = 1.04333312[s]  
X\_domain = 13C  
X\_freq = 100.52530333[MHz]  
X\_offset = 120[ppm]  
X\_points = 32768  
X\_prescans = 4  
X\_resolution = 0.95846665[MHz]  
X\_sweep = 31.40703518[kHz]  
Irr\_domain = 1H  
Irr\_freq = 399.78219838[MHz]  
Irr\_offset = 5[ppm]  
Clipped = FALSE  
Mod\_return = 1  
Scans = 1000  
Total\_scans = 1000  
X\_90\_width = 8.16[us]  
X\_acq\_time = 1.04333312[s]  
X\_angle = 30[deg]  
X\_atn = 7.8[dB]  
X\_pulse = 2.72[us]  
Irr\_atn\_dec = 22.703[dB]  
Irr\_atn\_noe = 22.703[dB]  
Irr\_noise = WALTZ  
Decoupling = TRUE  
Initial\_wait = 1[s]  
Noe = TRUE  
Noe\_time = 2[s]  
Recvr\_gain = 48  
Relaxation\_delay = 2[s]  
Repetition\_time = 3.04333312[s]  
Temp\_get = 21.9[degC]

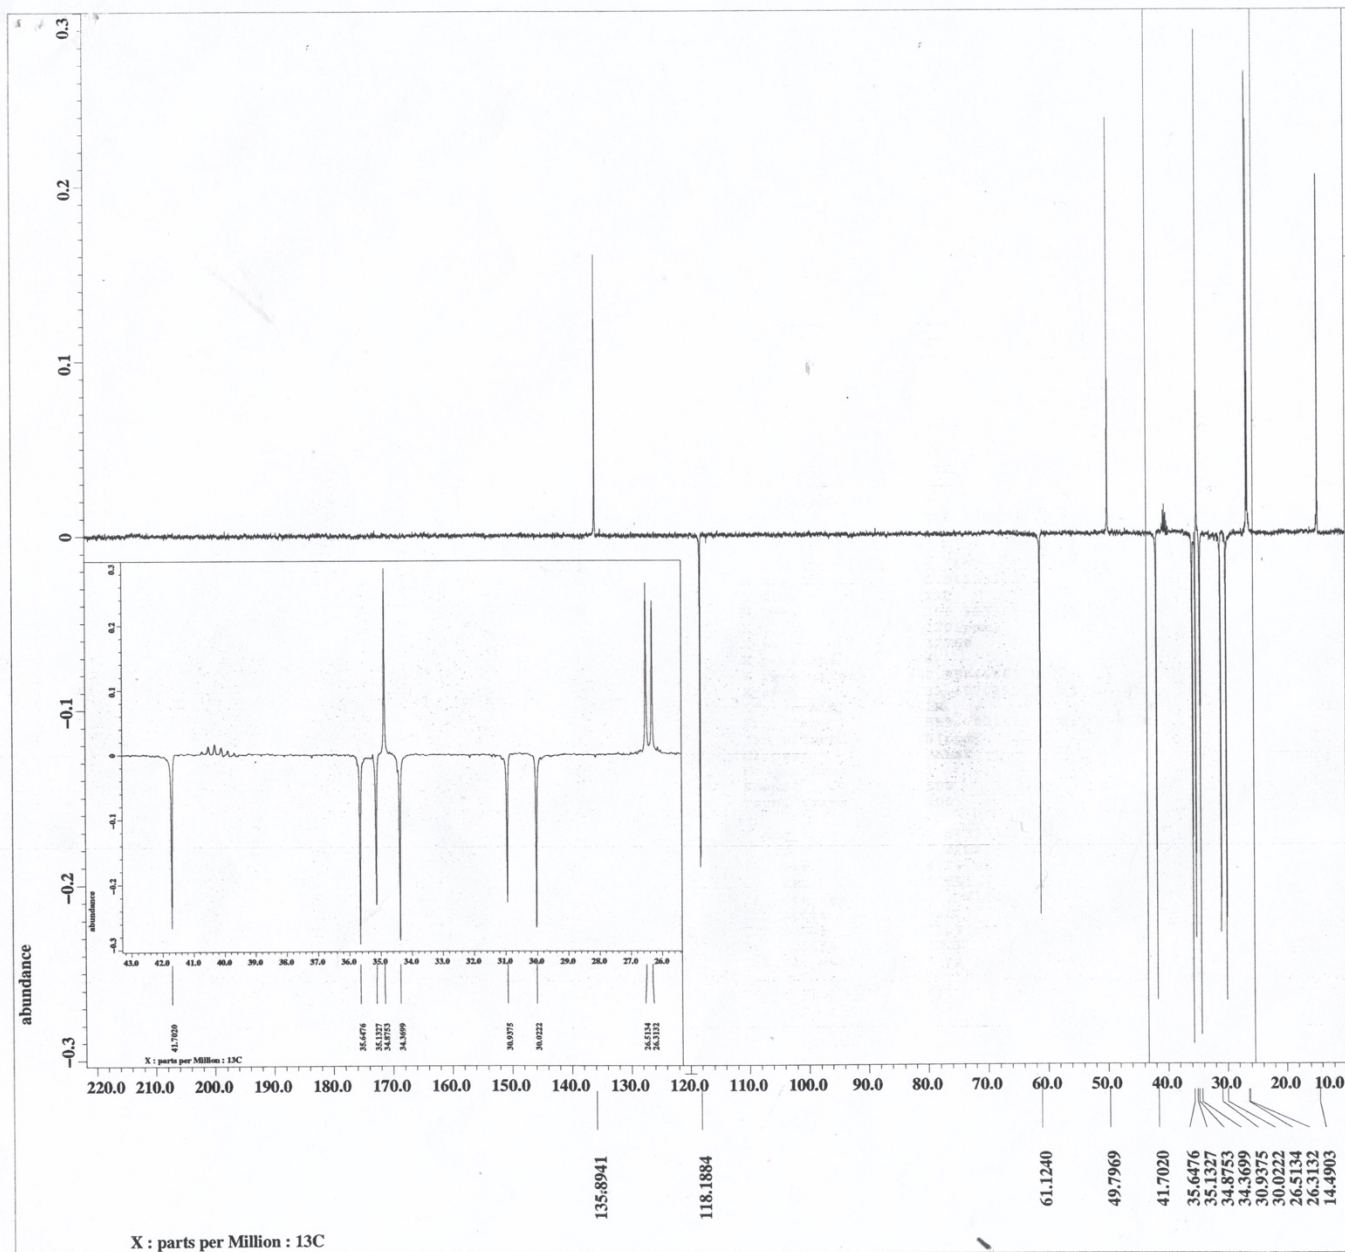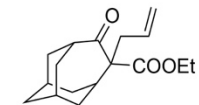

Filename = TIM\_DEPT135\_117-5.jdf  
 Author = delta  
 Experiment = dept.ex2  
 Sample\_id = TIM\_117  
 Solvent = DMSO-D6  
 Creation\_time = 16-MAR-2018 00:08:17  
 Revision\_time = 16-MAR-2018 16:05:32  
 Current\_time = 16-MAR-2018 16:05:51

Comment = DEPT with decoupling  
 Data\_format = 1D COMPLEX  
 Dim\_size = 26214  
 Dim\_title = 13C  
 Dim\_units = [ppm]  
 Dimensions = X  
 Site = ECX 400  
 Spectrometer = JNM-ECX400

Field\_strength = 9.389766[T] (400[MHz])  
 X\_acq\_duration = 1.04333312[s]  
 X\_domain = 13C  
 X\_freq = 100.52530333[MHz]  
 X\_offset = 120[ppm]  
 X\_points = 32768  
 X\_prescans = 4  
 X\_resolution = 0.95846665[Hz]  
 X\_sweep = 31.40703518[kHz]  
 Irr\_domain = 1H  
 Irr\_freq = 399.78219838[MHz]  
 Irr\_offset = 5[ppm]  
 Clipped = FALSE  
 Mod\_return = 1  
 Scans = 500  
 Total\_scans = 500

X\_acq\_time = 1.04333312[s]  
 X\_atn = 7.8[dB]  
 X\_pulse = 8.16[us]  
 Irr\_atn = 3[dB]  
 Irr\_atn\_dec = 22.703[dB]  
 Irr\_noise = WALTZ  
 Irr\_pulse = 11.9[us]  
 Decoupling = TRUE  
 Initial\_wait = 1[s]  
 J\_constant = 140[Hz]  
 Recvr\_gain = 46  
 Relaxation\_delay = 2[s]  
 Selection\_angle = 135[deg]  
 Selection\_pulse = 17.85[us]  
 Temp\_get = 21.7[dc]



Chloroform

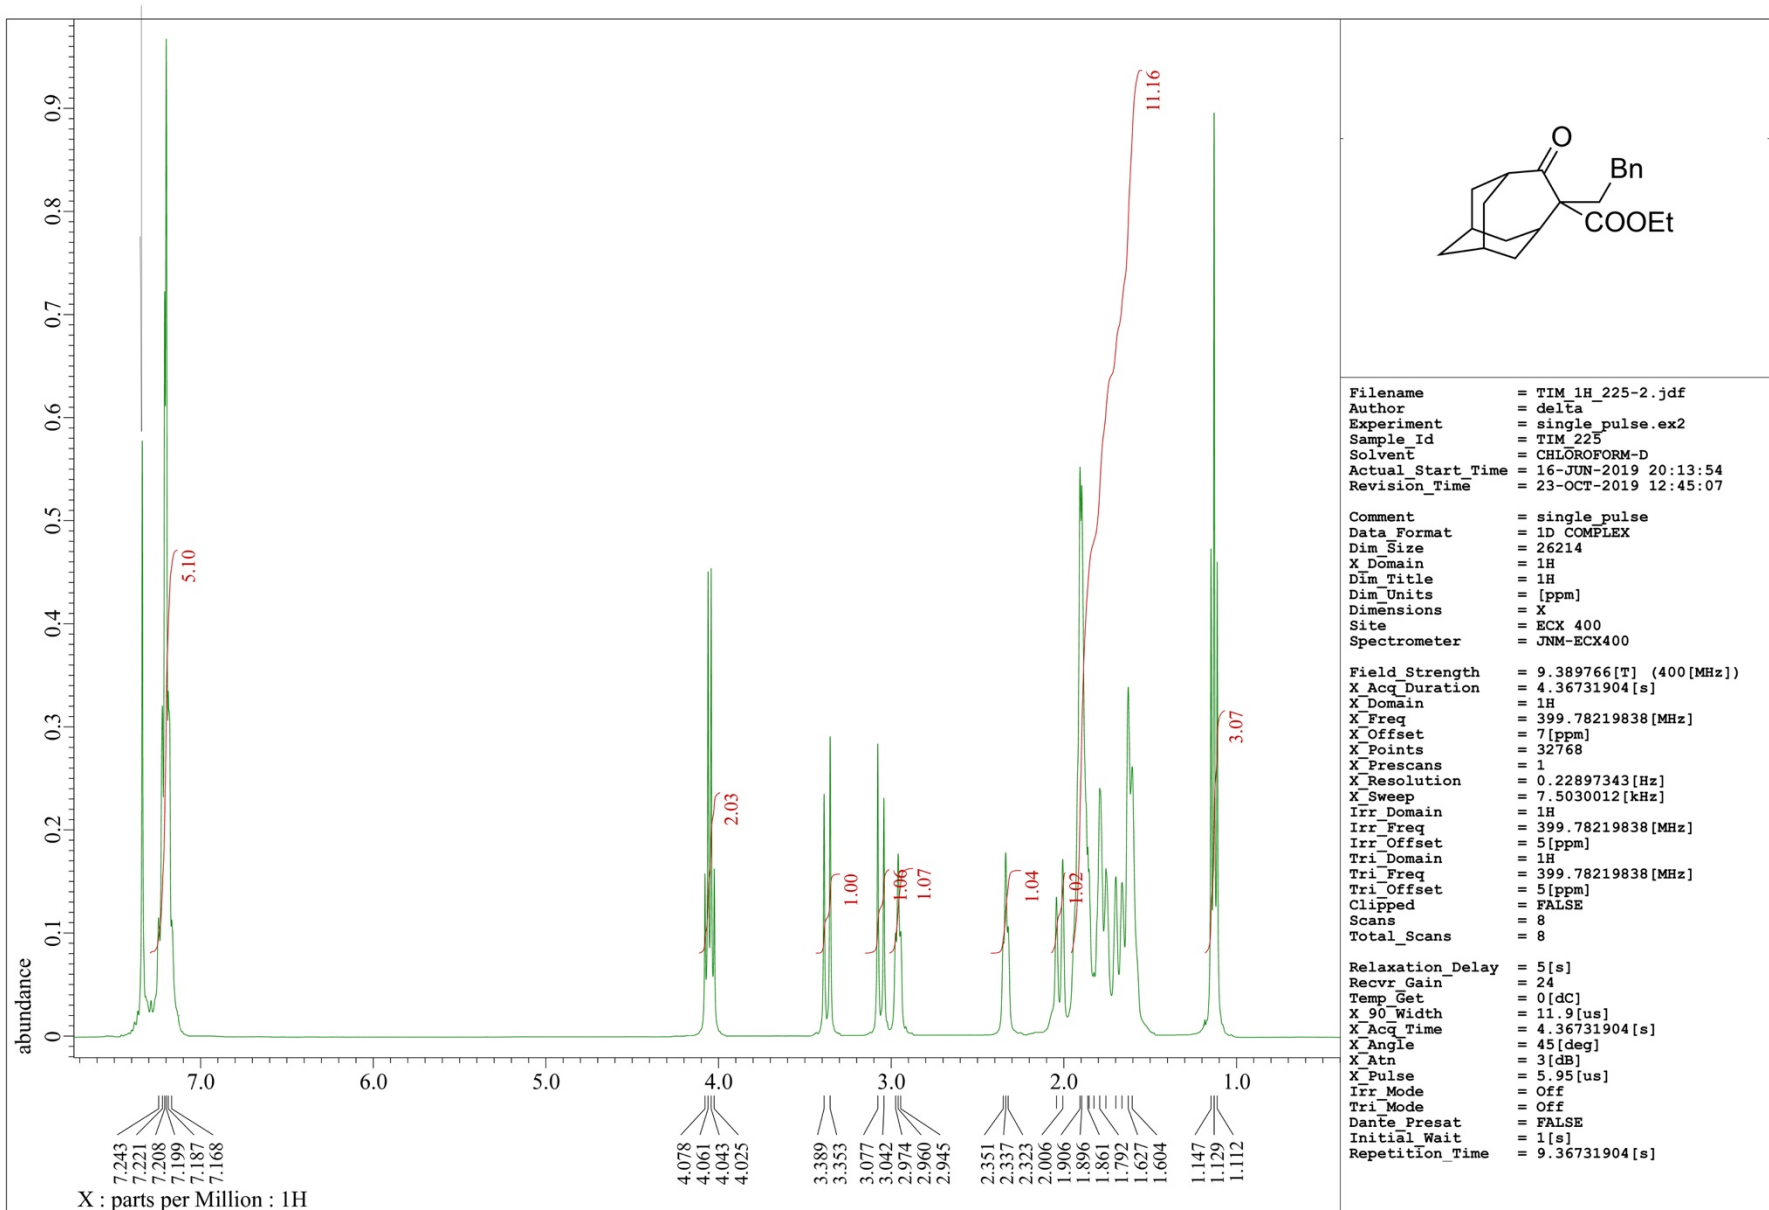





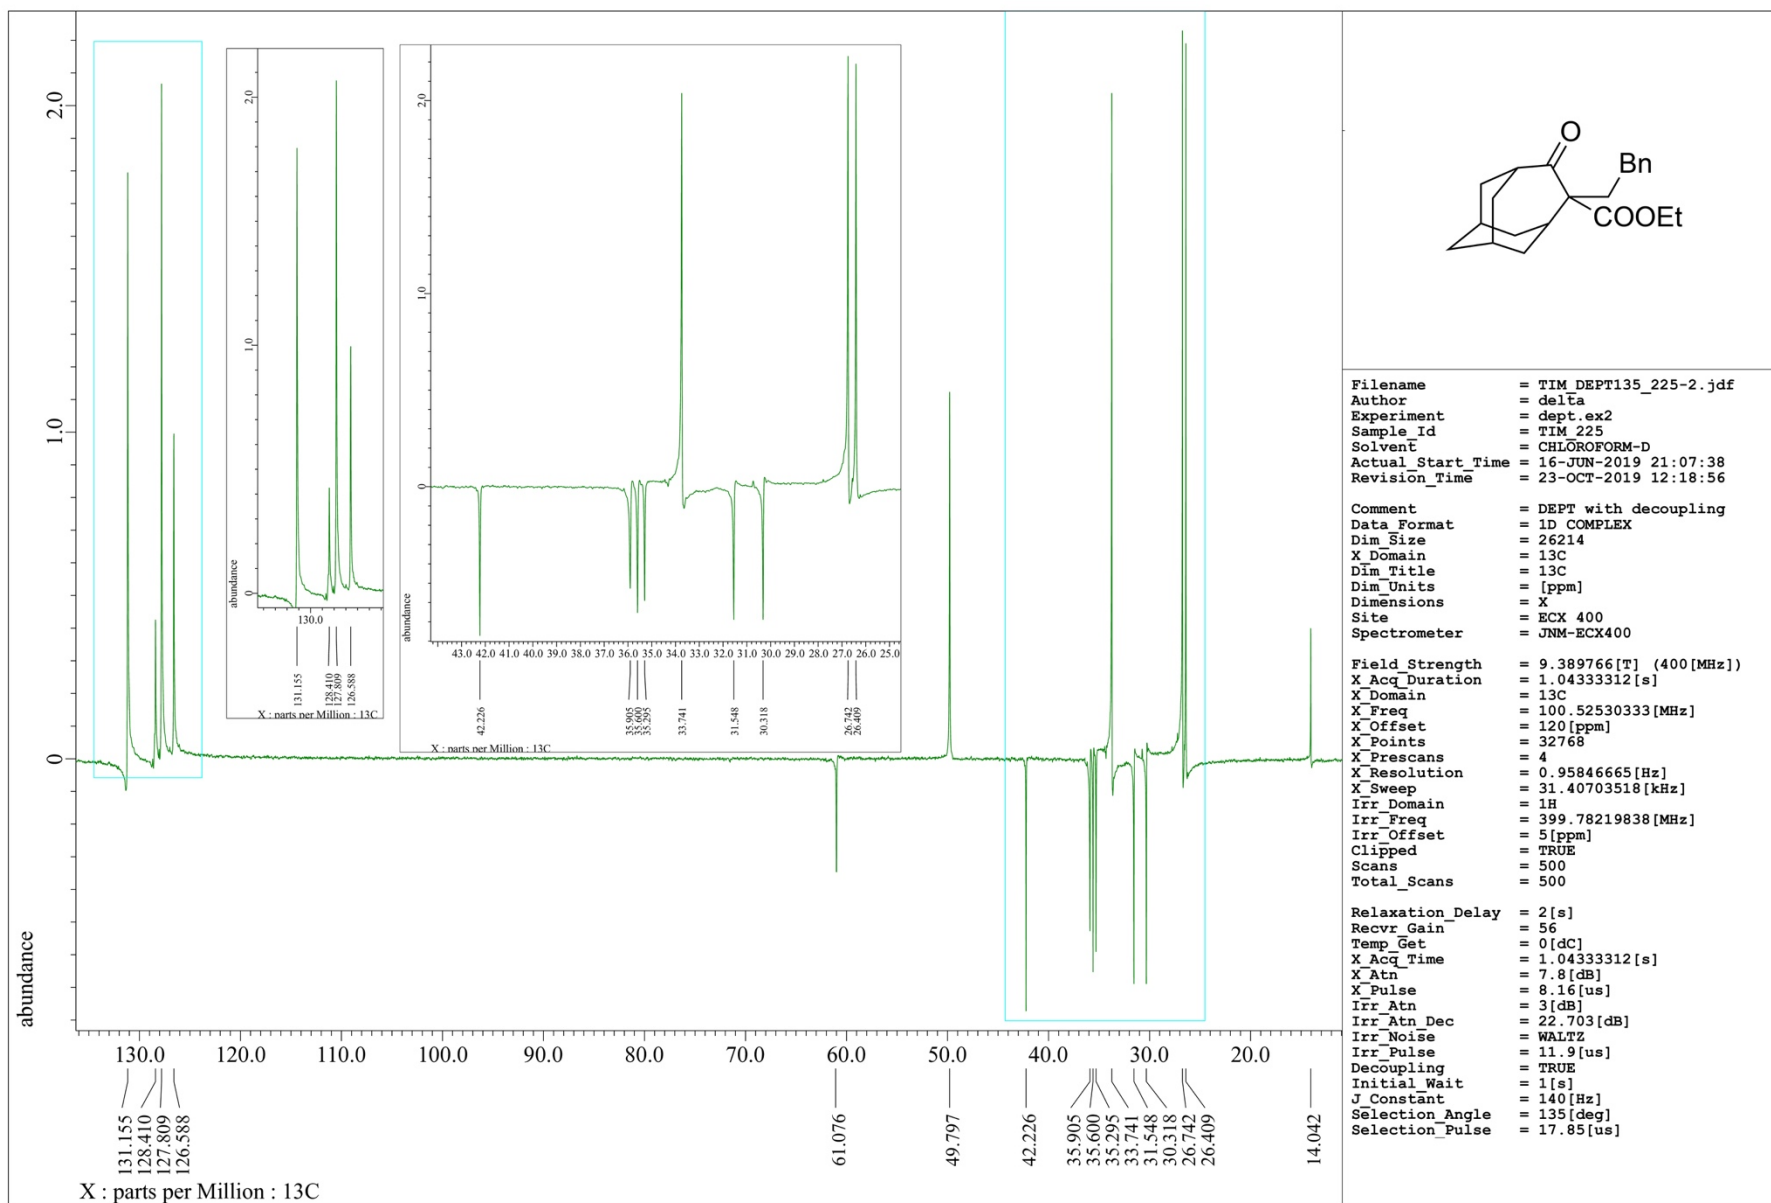

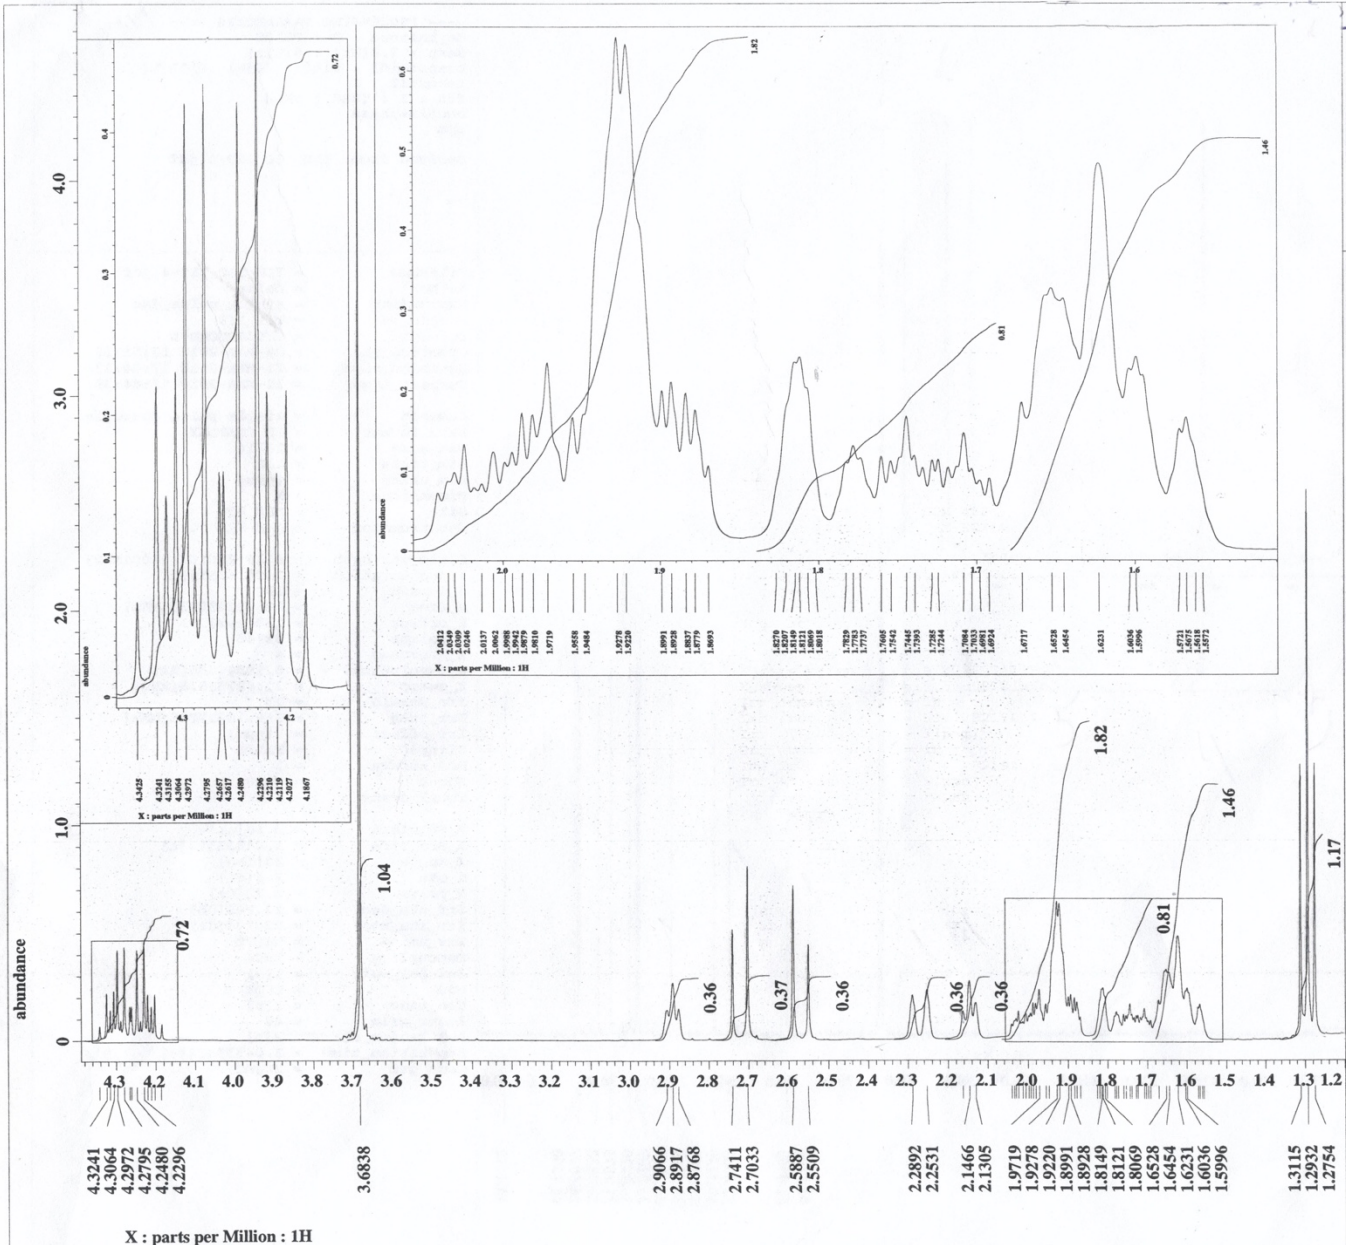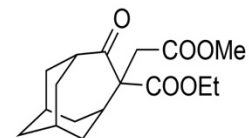

Filename = TIM\_1H\_119-4.jdf  
 Author = delta  
 Experiment = single\_pulse.ex2  
 Sample\_id = TIM\_119  
 Solvent = CHLOROFORM-D  
 Creation\_time = 20-MAR-2018 11:57:53  
 Revision\_time = 21-MAR-2018 17:40:30  
 Current\_time = 21-MAR-2018 17:40:37  
 Comment = single\_pulse  
 Data\_format = 1D COMPLEX  
 Dim\_size = 26214  
 Dim\_title = 1H  
 Dim\_units = [ppm]  
 Dimensions = X  
 Site = ECK 400  
 Spectrometer = JNM-ECK400  
 Field\_strength = 9.389766 [T] (400 [MHz])  
 X\_acq\_duration = 4.36731904 [s]  
 X\_domain = 1H  
 X\_freq = 399.78219838 [MHz]  
 X\_offset = 7 [ppm]  
 X\_points = 32768  
 X\_prescans = 1  
 X\_resolution = 0.22897343 [Hz]  
 X\_sweep = 7.5030012 [kHz]  
 Irr\_domain = 1H  
 Irr\_freq = 399.78219838 [MHz]  
 Irr\_offset = 5 [ppm]  
 Tri\_domain = 1H  
 Tri\_freq = 399.78219838 [MHz]  
 Tri\_offset = 5 [ppm]  
 Clipped = FALSE  
 Mod\_return = 1  
 Scans = 8  
 Total\_scans = 8  
 X\_90\_width = 11.9 [us]  
 X\_acq\_time = 4.36731904 [s]  
 X\_angle = 45 [deg]  
 X\_atn = 3 [dB]  
 X\_pulse = 5.95 [us]  
 Irr\_mode = Off  
 Tri\_mode = Off  
 Dante\_presat = FALSE  
 Initial\_wait = 1 [s]  
 Recvr\_gain = 34  
 Relaxation\_delay = 5 [s]  
 Repetition\_time = 9.36731904 [s]  
 Temp\_get = 19.7 [dC]



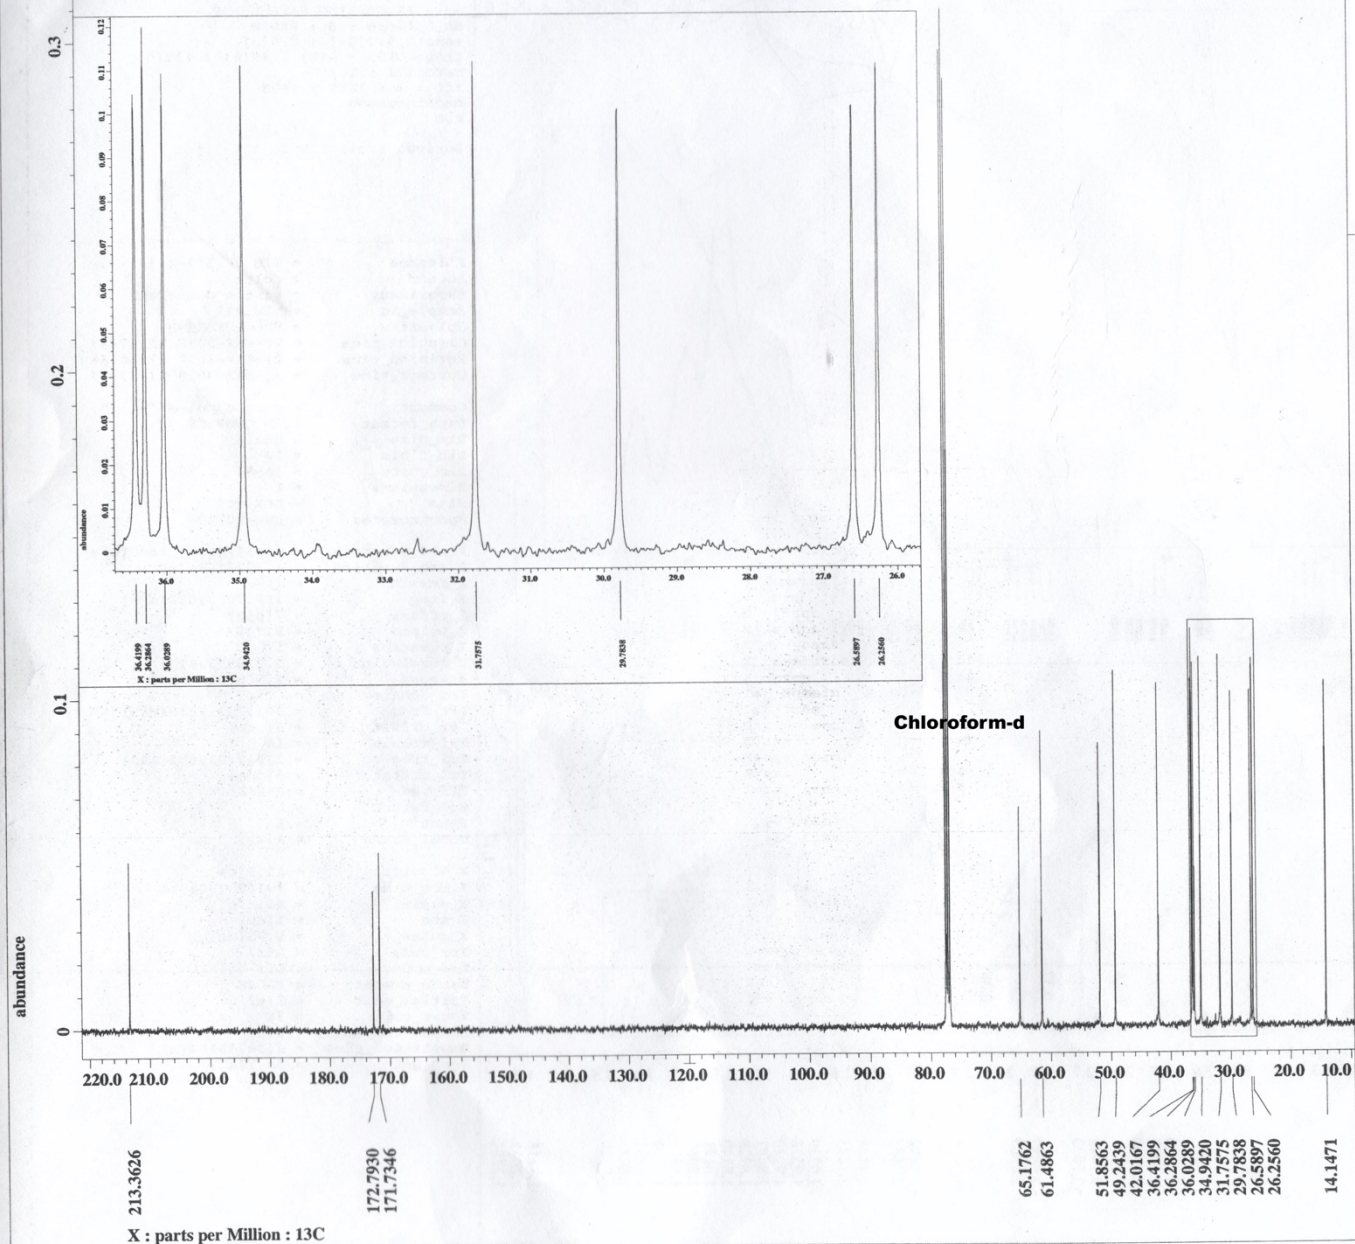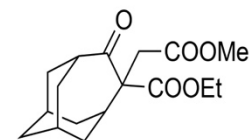

Filename = TIM\_13C\_119-4.jdf  
 Author = delta  
 Experiment = single\_pulse\_dec  
 Sample\_id = TIM\_119  
 Solvent = CHLOROFORM-D  
 Creation\_time = 20-MAR-2018 12:51:10  
 Revision\_time = 21-MAR-2018 17:44:13  
 Current\_time = 21-MAR-2018 17:44:38

Comment = single pulse decouple  
 Data\_format = 1D COMPLEX  
 Dim\_size = 26214  
 Dim\_title = 13C  
 Dim\_units = [ppm]  
 Dimensions = X  
 Site = ECX 400  
 Spectrometer = JNM-ECX400

Field\_strength = 9.389766[T] (400[MHz])  
 X\_acq\_duration = 1.04333312[s]  
 X\_domain = 13C  
 X\_freq = 100.52530333[MHz]  
 X\_offset = 120[ppm]  
 X\_points = 32768  
 X\_prescans = 4  
 X\_resolution = 0.95846665[Hz]  
 X\_sweep = 31.40703518[kHz]  
 Irr\_domain = 1H  
 Irr\_freq = 399.78219838[MHz]  
 Irr\_offset = 5[ppm]  
 Clipped = FALSE  
 Mod\_return = 1  
 Scans = 1000  
 Total\_scans = 1000

X\_90\_width = 8.16[us]  
 X\_acq\_time = 1.04333312[s]  
 X\_angle = 30[deg]  
 X\_atn = 7.8[dB]  
 X\_pulse = 2.72[us]  
 Irr\_atn\_dec = 22.703[dB]  
 Irr\_atn\_noe = 22.703[dB]  
 Irr\_noise = WALTZ  
 Decoupling = TRUE  
 Initial\_wait = 1[s]  
 Noe = TRUE  
 Noe\_time = 2[s]  
 Recvr\_gain = 46  
 Relaxation\_delay = 2[s]  
 Repetition\_time = 3.04333312[s]  
 Temp\_get = 20[dc]



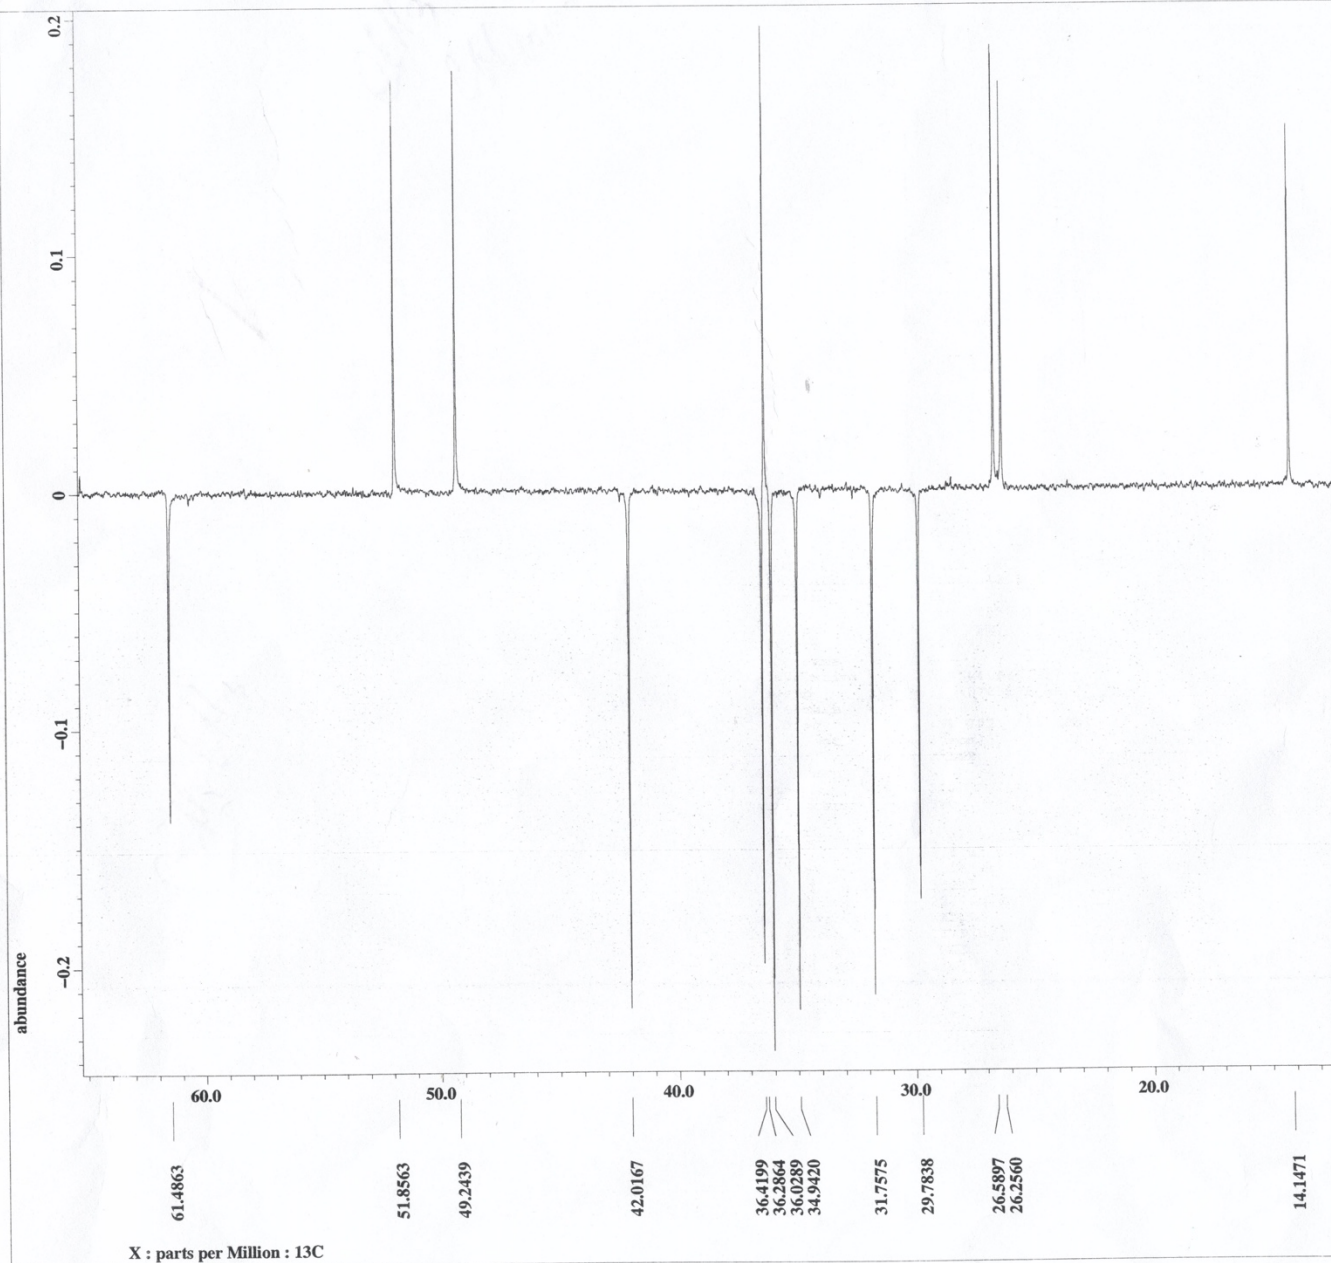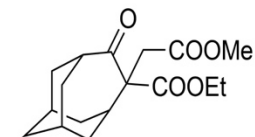

Filename = TIM\_DEPT135\_119-5.jdf  
 Author = delta  
 Experiment = dept.ex2  
 Sample\_id = TIM\_119  
 Solvent = CHLOROFORM-D  
 Creation\_time = 20-MAR-2018 13:16:58  
 Revision\_time = 21-MAR-2018 17:44:54  
 Current\_time = 21-MAR-2018 17:45:02

Comment = DEPT with decoupling  
 Data\_format = 1D COMPLEX  
 Dim\_size = 26214  
 Dim\_title = 13C  
 Dim\_units = [ppm]  
 Dimensions = X  
 Site = ECX 400  
 Spectrometer = JNM-ECX400

Field\_strength = 9.389766[T] (400[MHz])  
 X\_acq\_duration = 1.04333312[s]  
 X\_domain = 13C  
 X\_freq = 100.52530333[MHz]  
 X\_offset = 120[ppm]  
 X\_points = 32768  
 X\_prescans = 4  
 X\_resolution = 0.95846665[Hz]  
 X\_sweep = 31.40703518[kHz]  
 Irr\_domain = 1H  
 Irr\_freq = 399.78219838[MHz]  
 Irr\_offset = 5[ppm]  
 Clipped = FALSE  
 Mod\_return = 1  
 Scans = 500  
 Total\_scans = 500

X\_acq\_time = 1.04333312[s]  
 X\_atn = 7.8[db]  
 X\_pulse = 8.16[us]  
 Irr\_atn = 3[db]  
 Irr\_atn\_dec = 22.703[db]  
 Irr\_noise = WALTZ  
 Irr\_pulse = 11.9[us]  
 Decoupling = TRUE  
 Initial\_wait = 1[s]  
 J\_constant = 140[Hz]  
 Recvr\_gain = 46  
 Relaxation\_delay = 2[s]  
 Selection\_angle = 135[deg]  
 Selection\_pulse = 17.85[us]  
 Temp\_get = 19.9[dc]



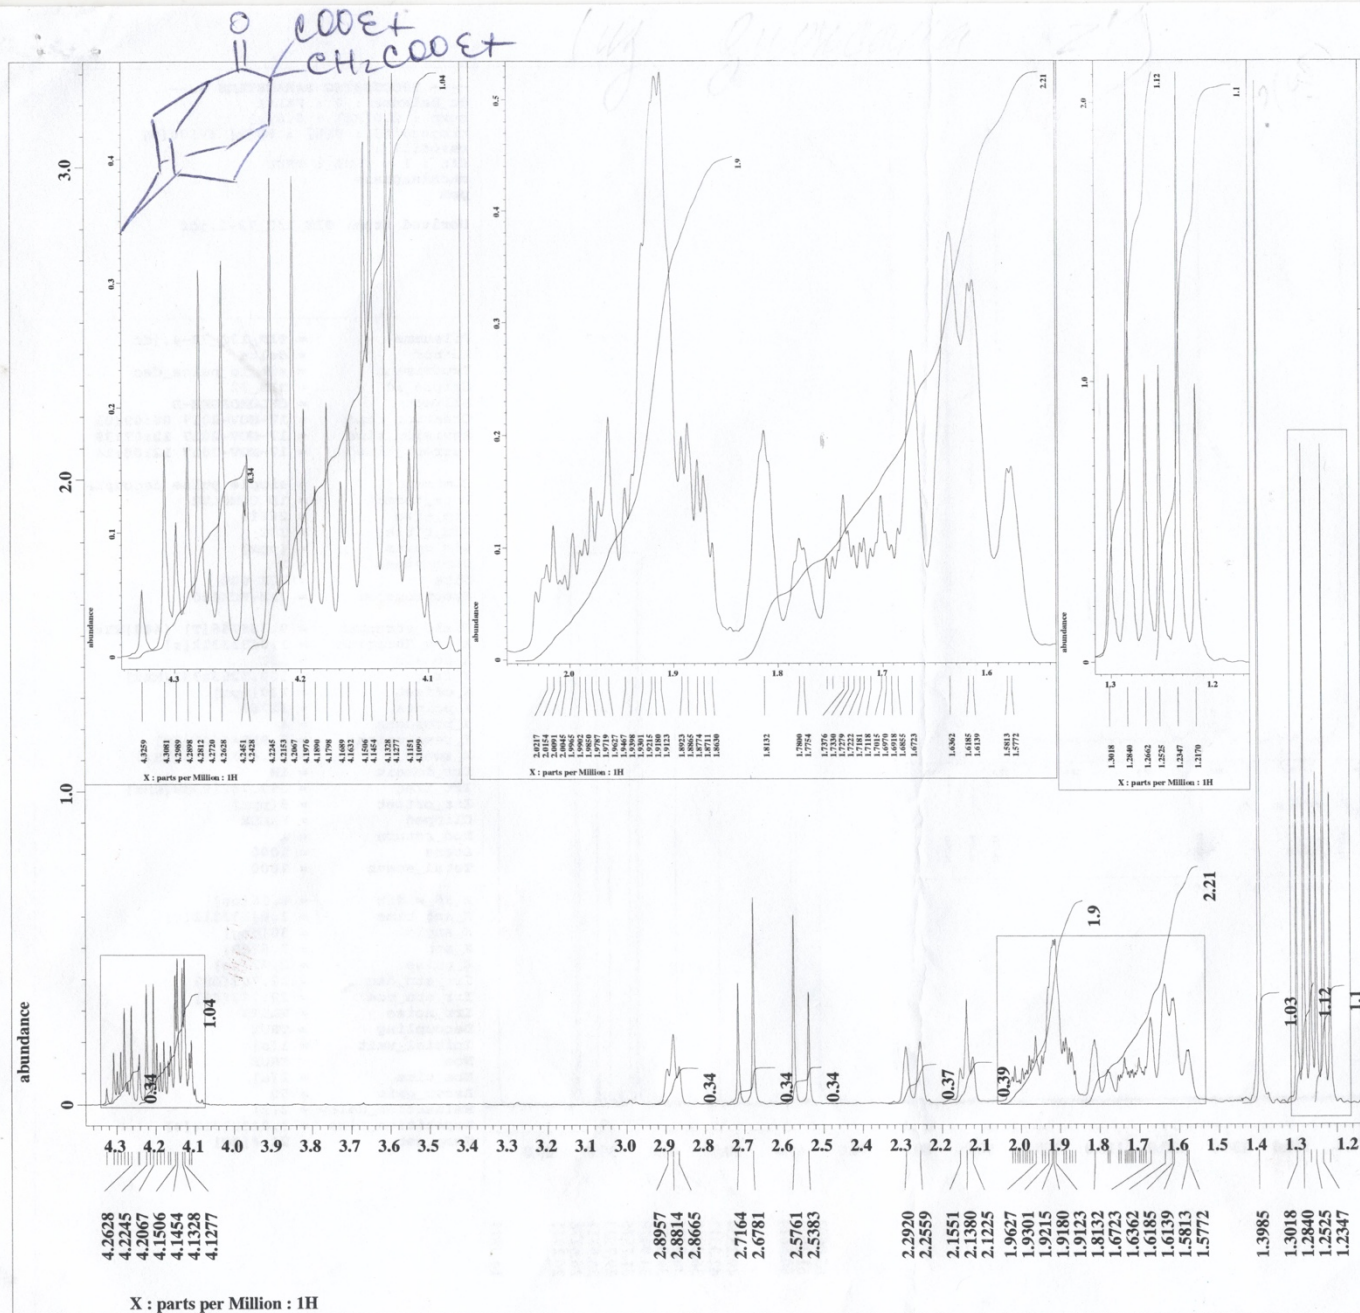

----- PROCESSING PARAMETERS -----  
 dc\_balance : 0 : FALSE  
 sexp : 0.2[Hz] : 0.0[s]  
 trapezoid3 : 0[%] : 80[%] : 100[%]  
 zerofill : 1  
 fft : 1 : TRUE : TRUE  
 machinephase  
 ppm

Derived from: TIM\_1H\_72-1.jdf

Filename = TIM\_1H\_72-4.jdf  
 Author = delta  
 Experiment = single\_pulse.ex2  
 Sample\_id = TIM\_72  
 Solvent = CHLOROFORM-D  
 Creation\_time = 17-NOV-2017 05:15:56  
 Revision\_time = 17-NOV-2017 12:07:06  
 Current\_time = 17-NOV-2017 12:07:30

Comment = single\_pulse  
 Data\_format = 1D COMPLEX  
 Dim\_size = 26214  
 Dim\_title = 1H  
 Dim\_units = [ppm]  
 Dimensions = X  
 Site = ECX 400  
 Spectrometer = JNM-ECX400

Field\_strength = 9.389766[T] (400[MHz])  
 X\_acq\_duration = 4.36731904[s]  
 X\_domain = 1H  
 X\_freq = 399.78219838[MHz]  
 X\_offset = 7[ppm]  
 X\_points = 32768  
 X\_prescans = 1  
 X\_resolution = 0.22897343[Hz]  
 X\_sweep = 7.5030012[kHz]  
 Irr\_domain = 1H  
 Irr\_freq = 399.78219838[MHz]  
 Irr\_offset = 5[ppm]  
 Tri\_domain = 1H  
 Tri\_freq = 399.78219838[MHz]  
 Tri\_offset = 5[ppm]  
 Clipped = FALSE  
 Mod\_return = 1  
 Scans = 8  
 Total\_scans = 8

X\_90\_width = 11.9[us]  
 X\_acq\_time = 4.36731904[s]  
 X\_angle = 45[deg]  
 X\_atn = 3[db]  
 X\_pulse = 5.95[us]  
 Irr\_mode = Off  
 Tri\_mode = Off  
 Dante\_preset = FALSE  
 Initial\_wait = 1[s]  
 Recvr\_gain = 30  
 Relaxation\_delay = 5[s]  
 Repetition\_time = 9.36731904[s]  
 Temp\_get = 28.4[dc]



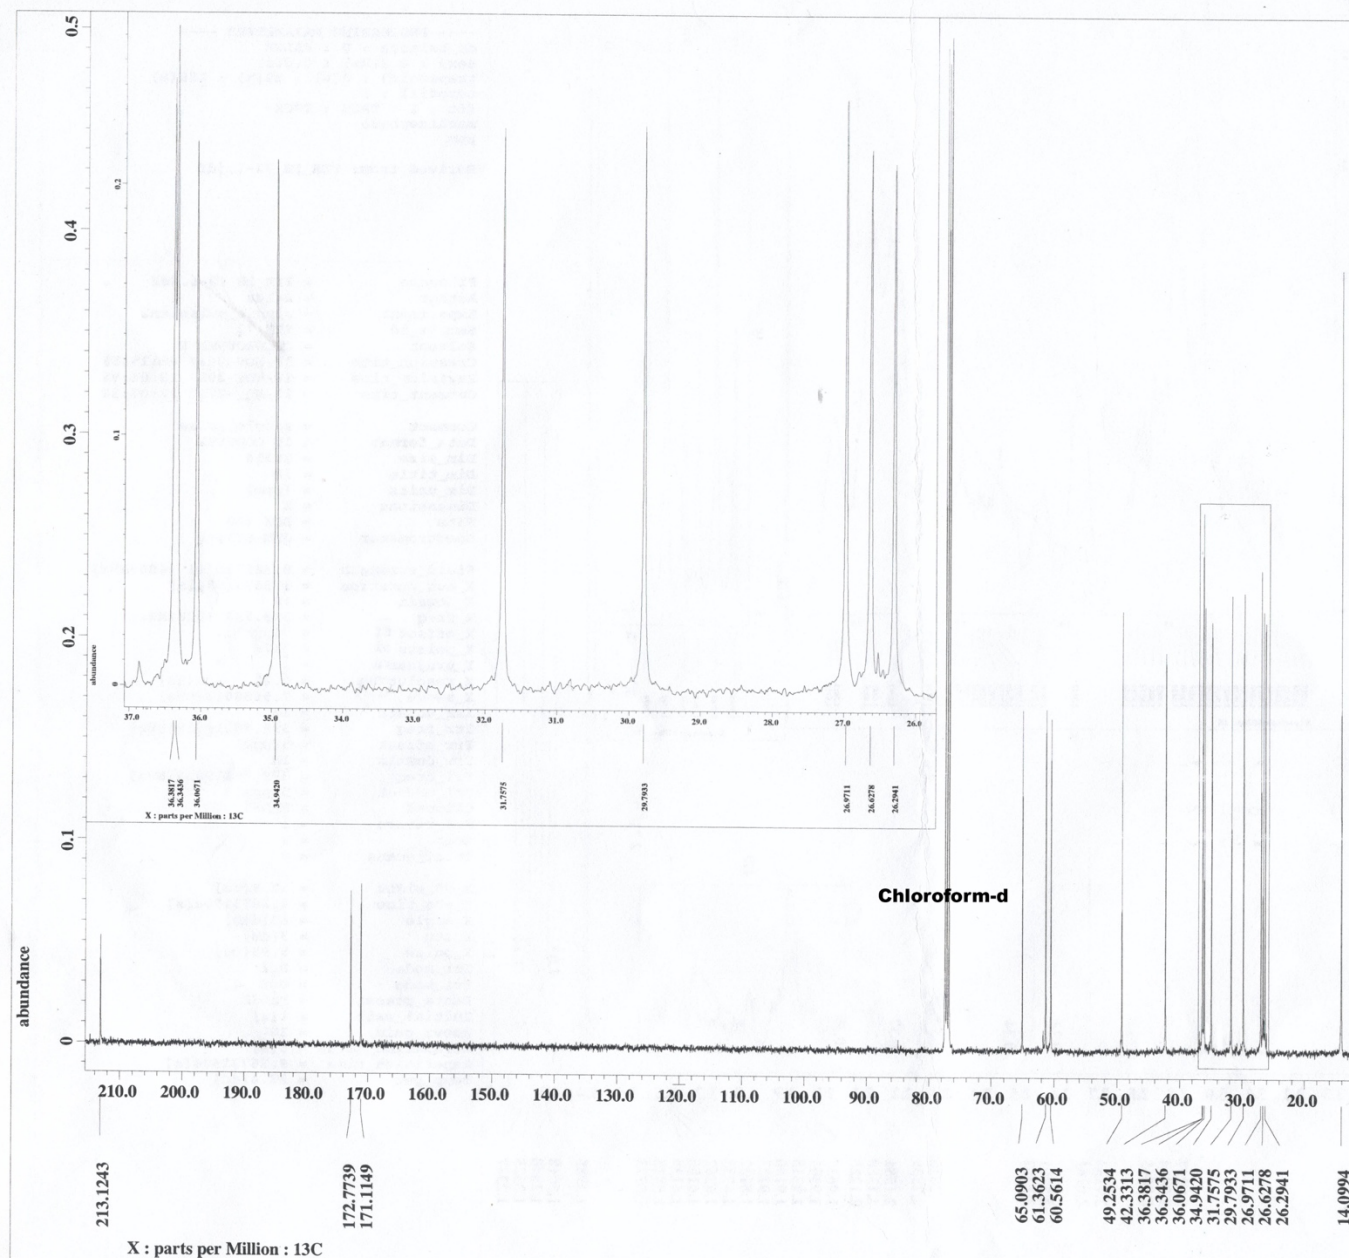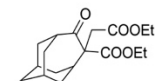

Filename = TIM\_13C\_72-4.jdf  
 Author = delta  
 Experiment = single\_pulse\_dec  
 Sample\_id = TIM\_72  
 Solvent = CHLOROFORM-D  
 Creation\_time = 17-NOV-2017 06:09:05  
 Revision\_time = 17-NOV-2017 12:07:39  
 Current\_time = 17-NOV-2017 12:08:14

Comment = single pulse decouple  
 Data\_format = 1D COMPLEX  
 Dim\_size = 26214  
 Dim\_title = 13C  
 Dim\_units = [ppm]  
 Dimensions = X  
 Site = ECX 400  
 Spectrometer = JNM-ECX400

Field\_strength = 9.389766[T] (400[MHz])  
 X\_acq\_duration = 1.04333312[s]  
 X\_domain = 13C  
 X\_freq = 100.52530333[MHz]  
 X\_offset = 120[ppm]  
 X\_points = 32768  
 X\_prescans = 4  
 X\_resolution = 0.95846665[Hz]  
 X\_sweep = 31.40703518[kHz]  
 Irr\_domain = 1H  
 Irr\_freq = 399.78219838[MHz]  
 Irr\_offset = 5[ppm]  
 Clipped = FALSE  
 Mod\_return = 1  
 Scans = 1000  
 Total\_scans = 1000

X\_90\_width = 8.16[us]  
 X\_acq\_time = 1.04333312[s]  
 X\_angle = 30[deg]  
 X\_atn = 7.8[dB]  
 X\_pulse = 2.72[us]  
 Irr\_atn\_dec = 22.703[dB]  
 Irr\_atn\_noe = 22.703[dB]  
 Irr\_noise = WALTZ  
 Decoupling = TRUE  
 Initial\_wait = 1[s]  
 Noe = TRUE  
 Noe\_time = 2[s]  
 Recvr\_gain = 50  
 Relaxation\_delay = 2[s]  
 Repetition\_time = 3.04333312[s]  
 Temp\_get = 24.4[dc]



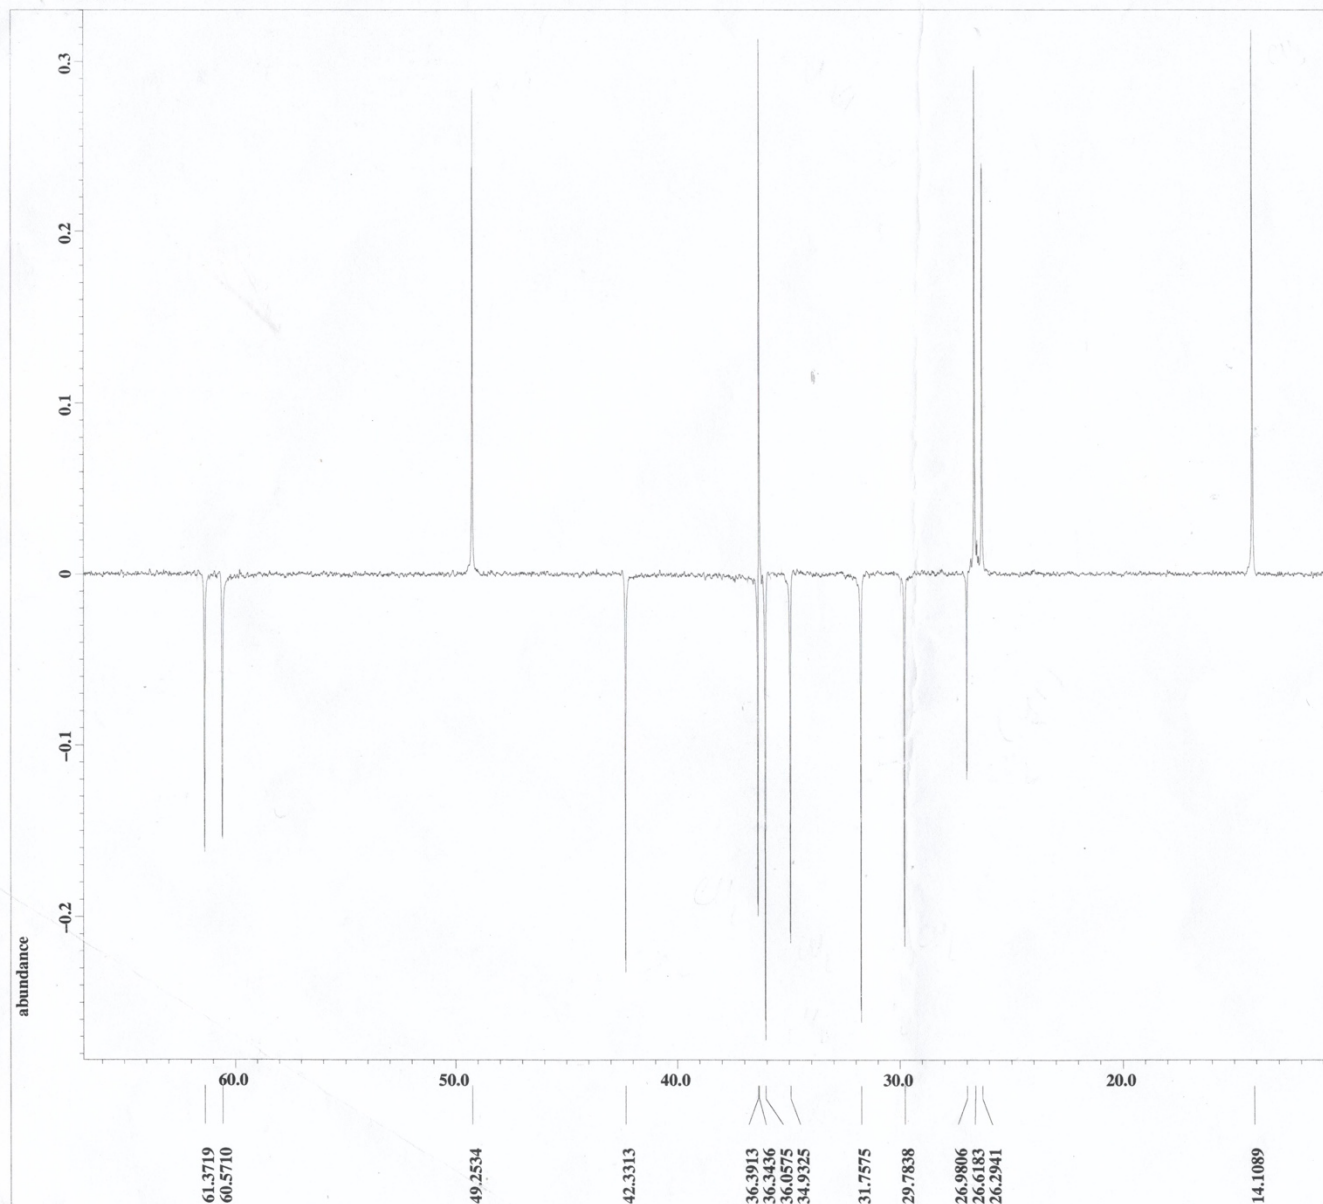

X : parts per Million : 13C

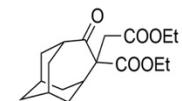

Filename = TIM\_DEPT135\_72-3.jdf  
 Author = delta  
 Experiment = dept.ex2  
 Sample\_id = TIM\_72  
 Solvent = CHLOROFORM-D  
 Creation\_time = 17-NOV-2017 06:35:00  
 Revision\_time = 17-NOV-2017 12:08:23  
 Current\_time = 17-NOV-2017 12:08:36

Comment = DEPT with decoupling  
 Data\_format = 1D COMPLEX  
 Dim\_size = 26214  
 Dim\_title = 13C  
 Dim\_units = [ppm]  
 Dimensions = X  
 Site = ECX 400  
 Spectrometer = JNM-ECX400

Field\_strength = 9.389766[T] (400 [MHz])  
 X\_acq\_duration = 1.04333312[s]  
 X\_domain = 13C  
 X\_freq = 100.52530333 [MHz]  
 X\_offset = 120 [ppm]  
 X\_points = 32768  
 X\_prescans = 4  
 X\_resolution = 0.95846665 [Hz]  
 X\_sweep = 31.40703518 [kHz]  
 Irr\_domain = 1H  
 Irr\_freq = 399.78219838 [MHz]  
 Irr\_offset = 5 [ppm]  
 Clipped = FALSE  
 Mod\_return = 1  
 Scans = 500  
 Total\_scans = 500

X\_acq\_time = 1.04333312[s]  
 X\_atn = 7.8 [dB]  
 X\_pulse = 8.16 [us]  
 Irr\_atn = 3 [dB]  
 Irr\_atn\_dec = 22.703 [dB]  
 Irr\_noise = WALTZ  
 Irr\_pulse = 11.9 [us]  
 Decoupling = TRUE  
 Initial\_wait = 1 [s]  
 J\_constant = 140 [Hz]  
 Recvr\_gain = 46  
 Relaxation\_delay = 2 [s]  
 Selection\_angle = 135 [deg]  
 Selection\_pulse = 17.85 [us]  
 Temp\_get = 23.8 [dC]

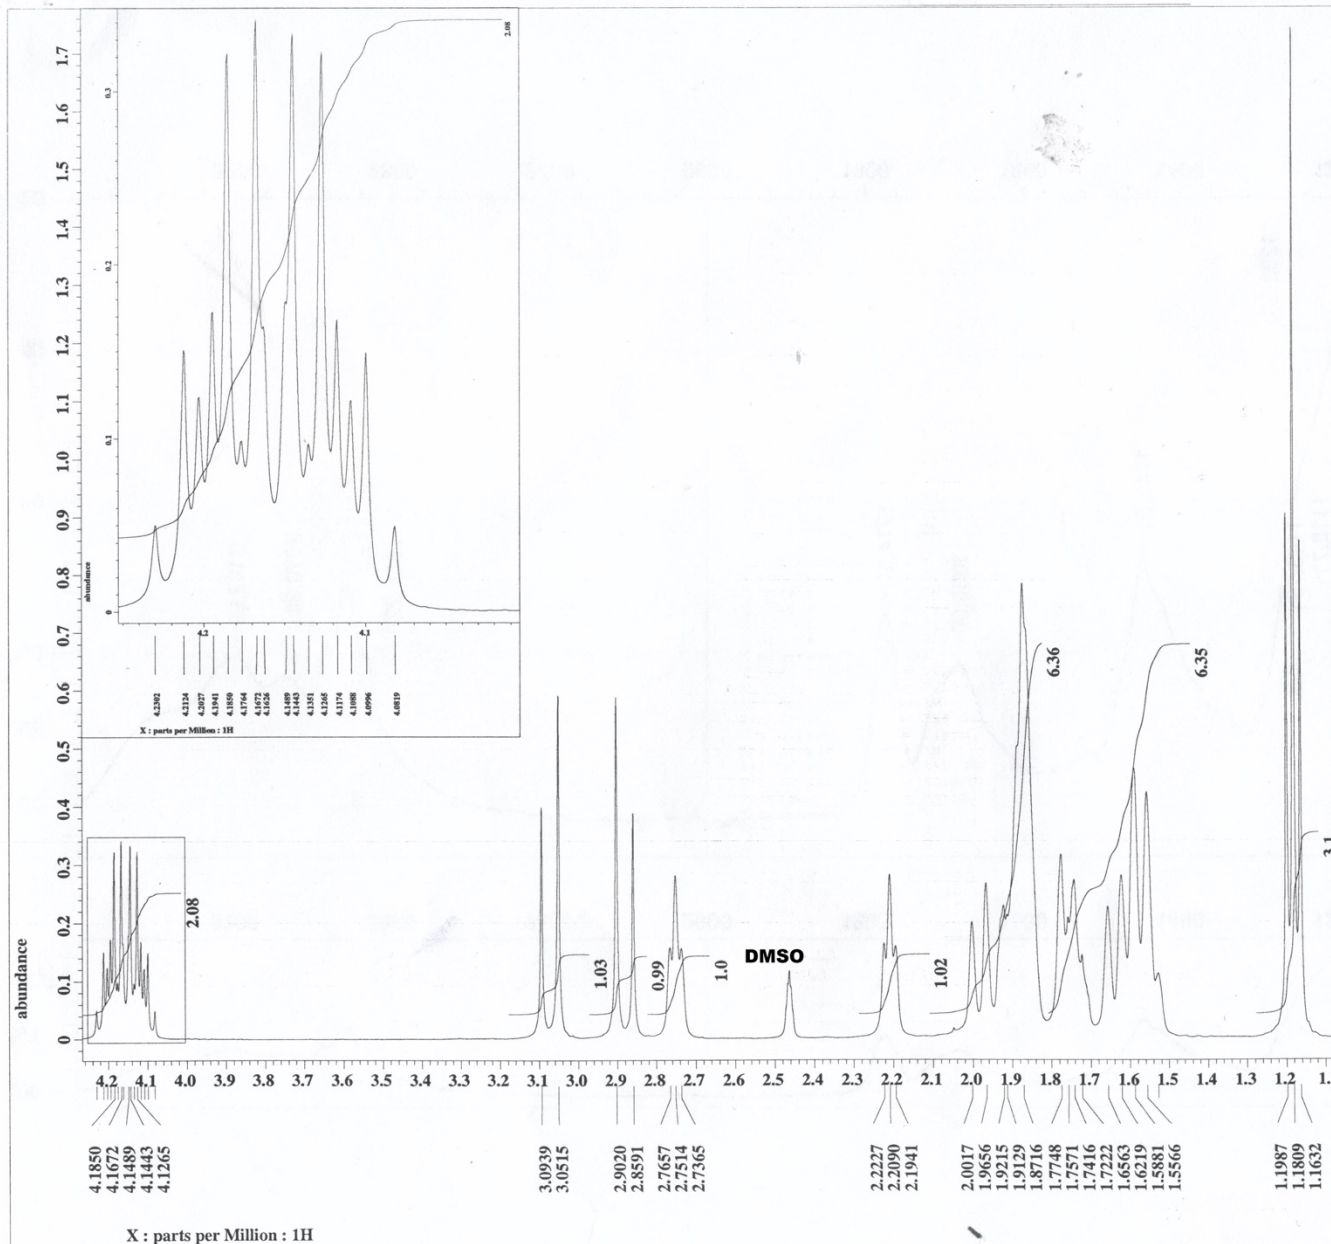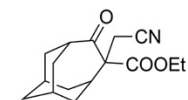

Filename = TIM\_1H\_146-4.jdf  
 Author = delta  
 Experiment = single\_pulse.ex2  
 Sample\_id = TIM\_146  
 Solvent = DMSO-D6  
 Creation\_time = 10-OCT-2018 14:22:41  
 Revision\_time = 10-OCT-2018 13:43:22  
 Current\_time = 10-OCT-2018 13:43:45

Comment = single\_pulse  
 Data\_format = 1D COMPLEX  
 Dim\_size = 26214  
 Dim\_title = 1H  
 Dim\_units = [ppm]  
 Dimensions = X  
 Site = ECX 400  
 Spectrometer = JNM-ECX400

Field\_strength = 9.389766[T] (400[MHz])  
 X\_acq\_duration = 4.36731904[s]  
 X\_domain = 1H  
 X\_freq = 399.78219838[MHz]  
 X\_offset = 7[ppm]  
 X\_points = 32768  
 X\_prescans = 1  
 X\_resolution = 0.22897343[Hz]  
 X\_sweep = 7.5030012[kHz]  
 Irr\_domain = 1H  
 Irr\_freq = 399.78219838[MHz]  
 Irr\_offset = 5[ppm]  
 Tri\_domain = 1H  
 Tri\_freq = 399.78219838[MHz]  
 Tri\_offset = 5[ppm]  
 Clipped = FALSE  
 Mod\_return = 1  
 Scans = 8  
 Total\_scans = 8

X\_90\_width = 11.9[us]  
 X\_acq\_time = 4.36731904[s]  
 X\_angle = 45[deg]  
 X\_atn = 3[db]  
 X\_pulse = 5.95[us]  
 Irr\_mode = Off  
 Tri\_mode = Off  
 Dante\_presat = FALSE  
 Initial\_wait = 1[s]  
 Recvr\_gain = 24  
 Relaxation\_delay = 5[s]  
 Repetition\_time = 9.36731904[s]  
 Temp\_get = 21.6[dc]



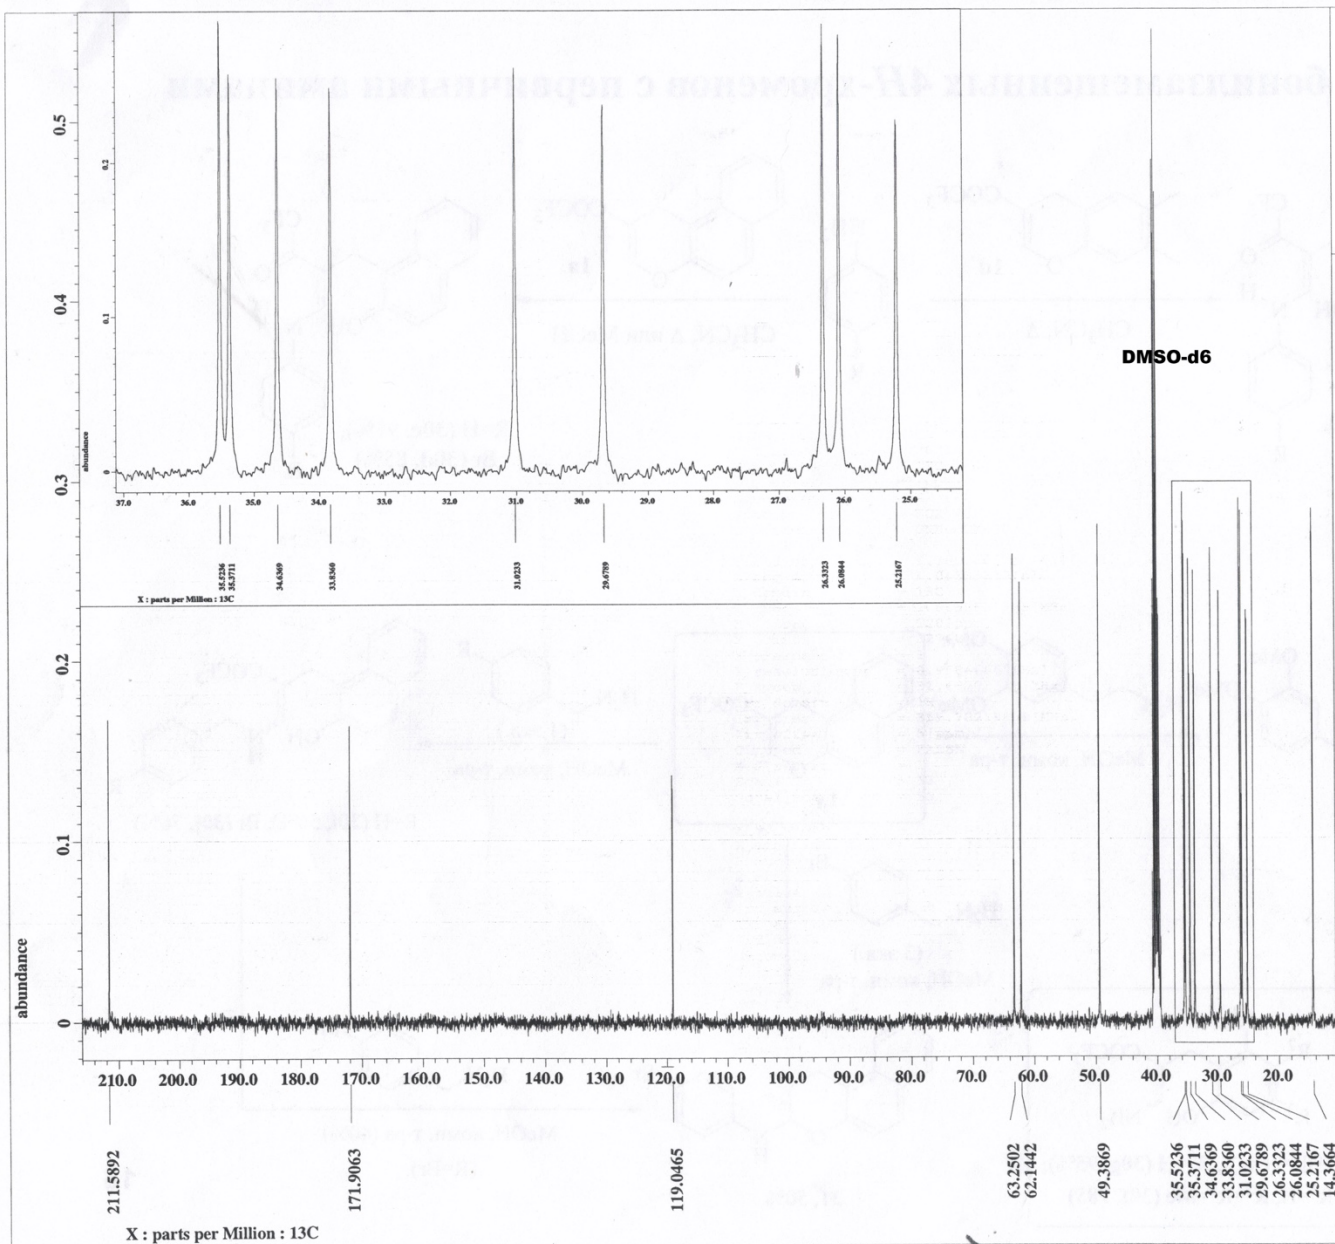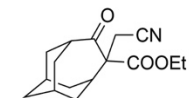

Filename = TIM\_13C\_146-3.jdf  
 Author = delta  
 Experiment = single\_pulse\_dec  
 Sample\_id = TIM\_146  
 Solvent = DMSO-D6  
 Creation\_time = 10-OCT-2018 14:37:40  
 Revision\_time = 10-OCT-2018 13:56:03  
 Current\_time = 10-OCT-2018 13:56:33

Comment = single pulse decouple  
 Data\_format = 1D COMPLEX  
 Dim\_size = 26214  
 Dim\_title = 13C  
 Dim\_units = [ppm]  
 Dimensions = X  
 Site = ECK 400  
 Spectrometer = JNM-ECK400

Field\_strength = 9.389766[T] (400[MHz])  
 X\_acq\_duration = 1.04333312[s]  
 X\_domain = 13C  
 X\_freq = 100.52530333[MHz]  
 X\_offset = 120[ppm]  
 X\_points = 32768  
 X\_prescans = 1  
 X\_resolution = 0.95846665[Hz]  
 X\_sweep = 31.40703518[kHz]  
 Irr\_domain = 1H  
 Irr\_freq = 399.78219838[MHz]  
 Irr\_offset = 5[ppm]  
 Clipped = FALSE  
 Mod\_return = 1  
 Scans = 53  
 Total\_scans = 53

X\_90\_width = 8.16[us]  
 X\_acq\_time = 1.04333312[s]  
 X\_angle = 30[deg]  
 X\_atn = 7.8[dB]  
 X\_pulse = 2.72[us]  
 Irr\_atn\_dec = 22.703[dB]  
 Irr\_atn\_noe = 22.703[dB]  
 Irr\_noise = WALTZ  
 Decoupling = TRUE  
 Initial\_wait = 1[s]  
 Noe = TRUE  
 Noe\_time = 2[s]  
 Recvr\_gain = 46  
 Relaxation\_delay = 2[s]  
 Repetition\_time = 3.04333312[s]  
 Temp\_get = 21.6[dc]

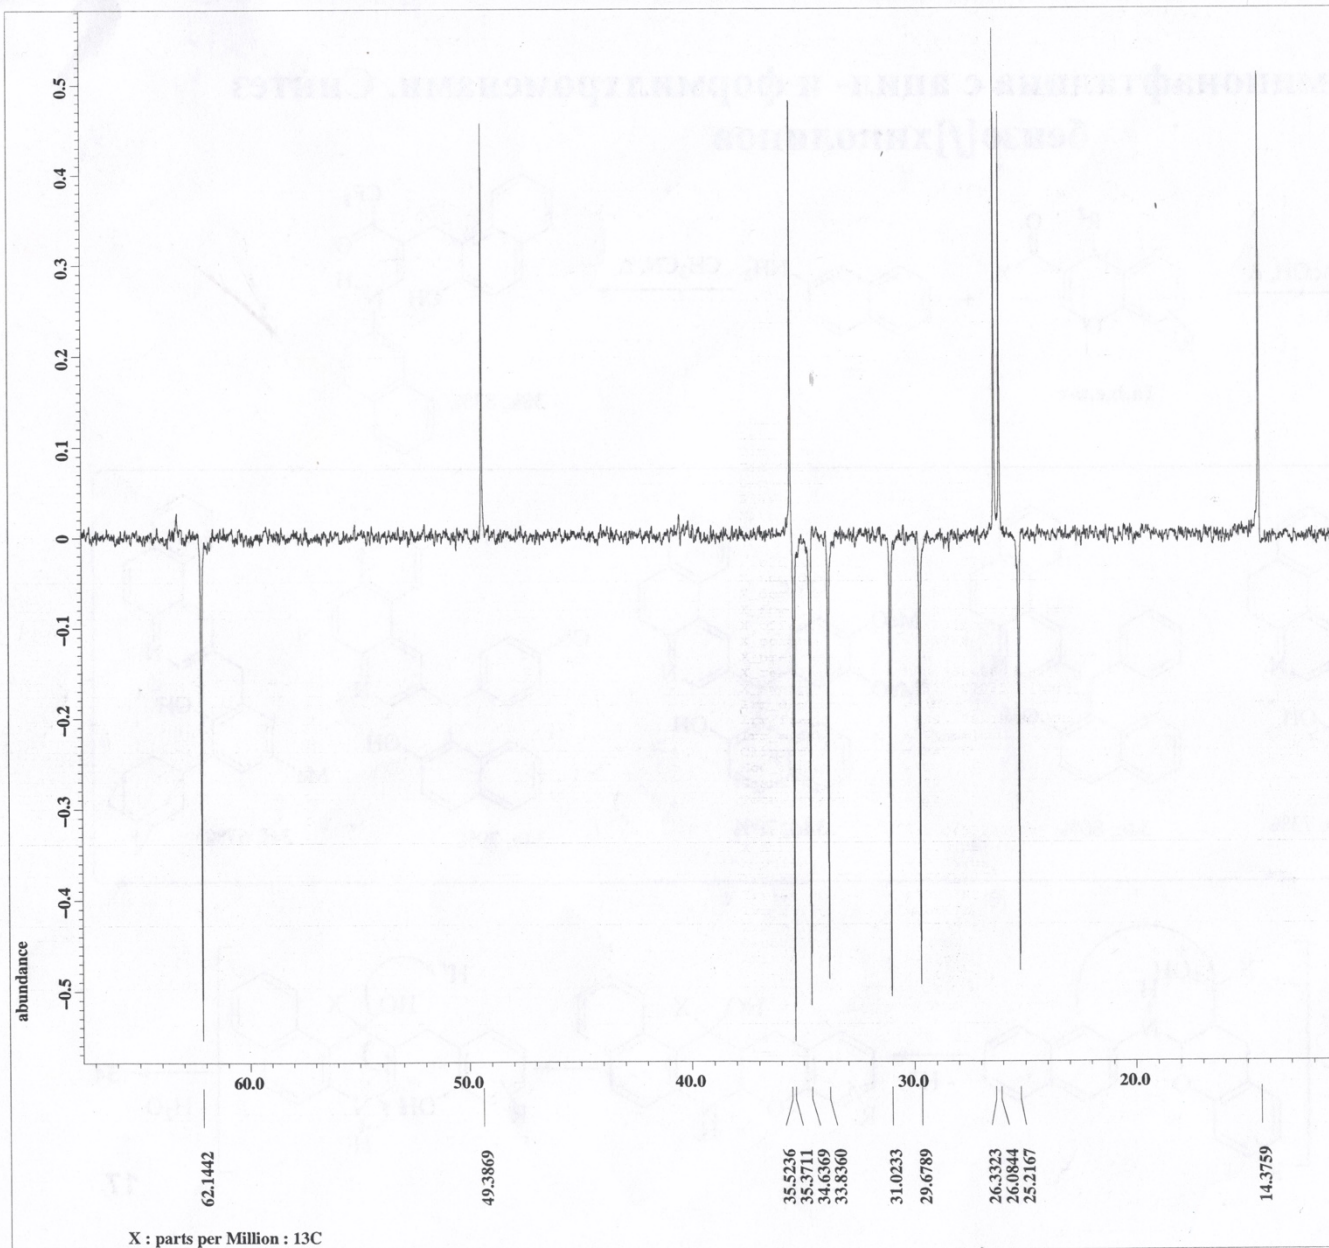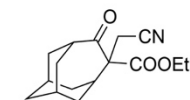

Filename = TIM\_DEPT135\_146-4.jdf  
 Author = delta  
 Experiment = dept.ex2  
 Sample\_id = TIM\_146  
 Solvent = DMSO-D6  
 Creation\_time = 10-OCT-2018 14:38:34  
 Revision\_time = 10-OCT-2018 13:57:10  
 Current\_time = 10-OCT-2018 13:57:17

Comment = DEPT with decoupling  
 Data\_format = 1D COMPLEX  
 Dim\_size = 26214  
 Dim\_title =  $^{13}\text{C}$   
 Dim\_units = [ppm]  
 Dimensions = X  
 Site = ECX 400  
 Spectrometer = JNM-ECX400

Field\_strength = 9.389766[T] (400[MHz])  
 X\_acq\_duration = 1.04333312[s]  
 X\_domain =  $^{13}\text{C}$   
 X\_freq = 100.52530333[MHz]  
 X\_offset = 120[ppm]  
 X\_points = 32768  
 X\_prescans = 4  
 X\_resolution = 0.95846665[Hz]  
 X\_sweep = 31.40703518[kHz]  
 Irr\_domain = 1H  
 Irr\_freq = 399.78219838[MHz]  
 Irr\_offset = 5[ppm]  
 Clipped = FALSE  
 Mod\_return = 1  
 Scans = 11  
 Total\_scans = 11

X\_acq\_time = 1.04333312[s]  
 X\_atn = 7.8[dB]  
 X\_pulse = 8.16[us]  
 Irr\_atn = 3[dB]  
 Irr\_atn\_dec = 22.703[dB]  
 Irr\_noise = WALTZ  
 Irr\_pulse = 11.9[us]  
 Decoupling = TRUE  
 Initial\_wait = 1[s]  
 J\_constant = 140[Hz]  
 Recvr\_gain = 46  
 Relaxation\_delay = 2[s]  
 Selection\_angle = 135[deg]  
 Selection\_pulse = 17.85[us]  
 Temp\_get = 21.6[ $^{\circ}\text{C}$ ]



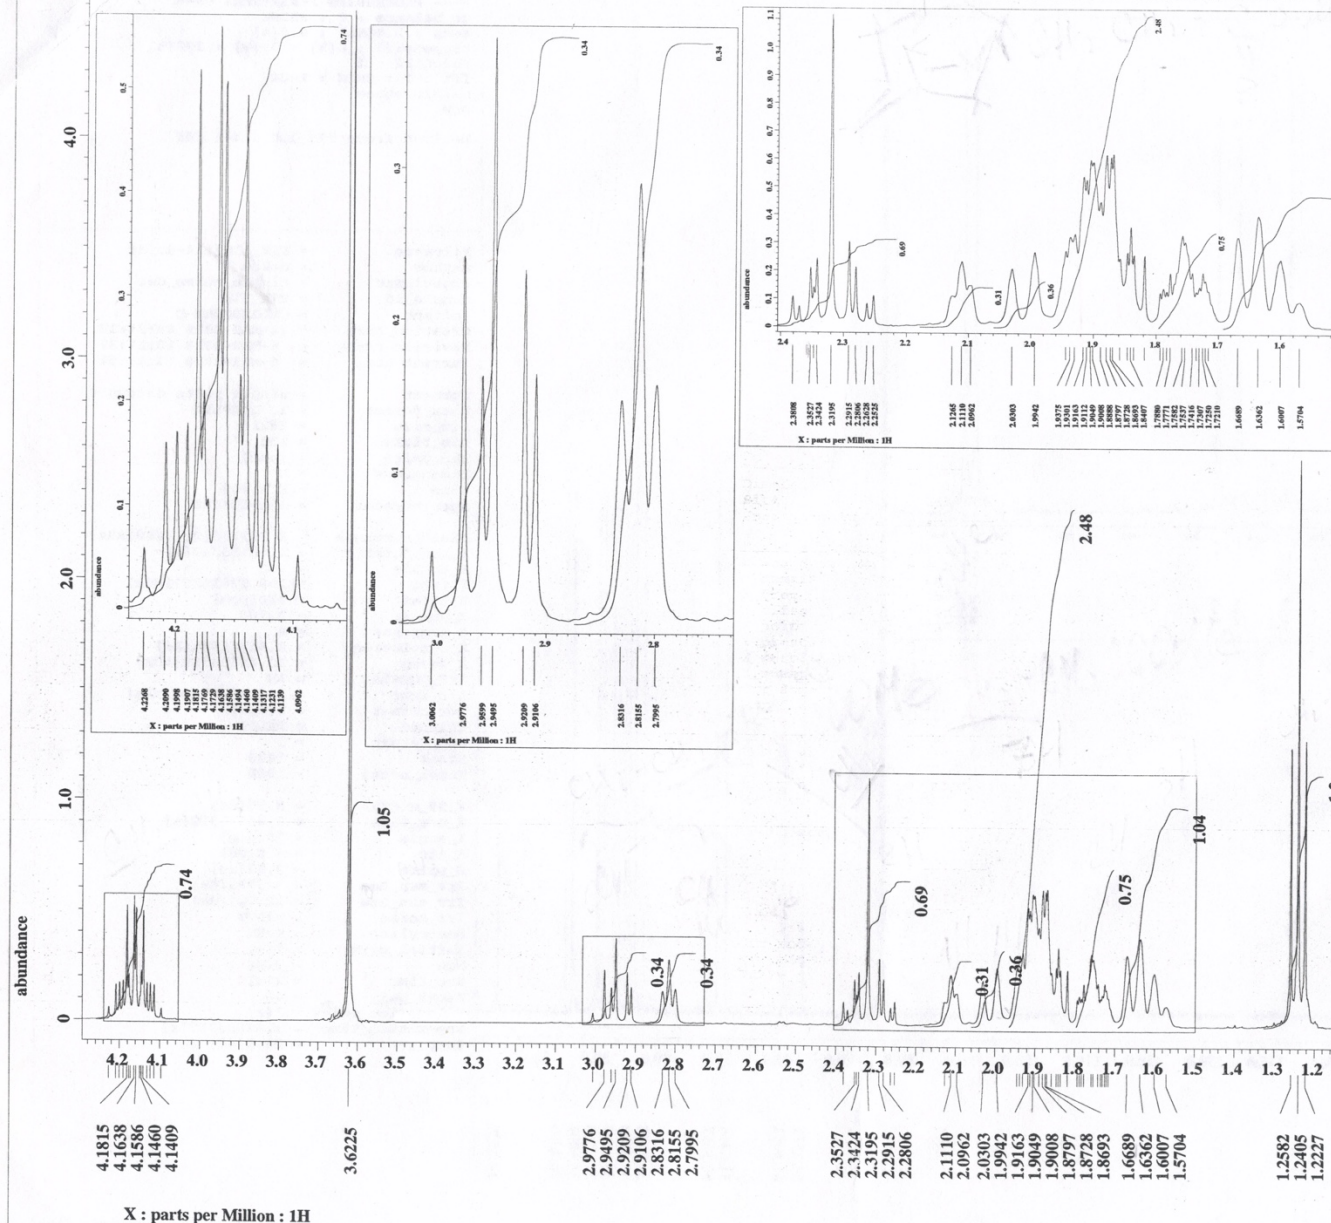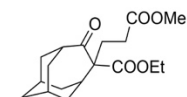

Filename = TIM\_1H\_114-4.jdf  
 Author = delta  
 Experiment = single\_pulse.ex2  
 Sample\_id = TIM\_114  
 Solvent = CHLOROFORM-D  
 Creation\_time = 6-MAR-2018 08:38:57  
 Revision\_time = 6-MAR-2018 13:10:45  
 Current\_time = 6-MAR-2018 13:11:24

Comment = single\_pulse  
 Data\_format = 1D COMPLEX  
 Dim\_size = 26214  
 Dim\_title = 1H  
 Dim\_units = [ppm]  
 Dimensions = X  
 Site = ECX 400  
 Spectrometer = JNM-ECX400

Field\_strength = 9.389766[T] (400[MHz])  
 X\_acq\_duration = 4.36731904[s]  
 X\_domain = 1H  
 X\_freq = 399.78219838[MHz]  
 X\_offset = 7[ppm]  
 X\_points = 32768  
 X\_prescans = 1  
 X\_resolution = 0.22897343[Hz]  
 X\_sweep = 7.5030012[kHz]  
 Irr\_domain = 1H  
 Irr\_freq = 399.78219838[MHz]  
 Irr\_offset = 5[ppm]  
 Tri\_domain = 1H  
 Tri\_freq = 399.78219838[MHz]  
 Tri\_offset = 5[ppm]  
 Clipped = FALSE  
 Mod\_return = 1  
 Scans = 8  
 Total\_scans = 8  
 X\_90\_width = 11.9[us]  
 X\_acq\_time = 4.36731904[s]  
 X\_angle = 45[deg]  
 X\_atn = 3[db]  
 X\_pulse = 5.95[us]  
 Irr\_mode = Off  
 Tri\_mode = Off  
 Dante\_presat = FALSE  
 Initial\_wait = 1[s]  
 Recvr\_gain = 30  
 Relaxation\_delay = 5[s]  
 Repetition\_time = 9.36731904[s]  
 Temp\_get = 20.3[dc]



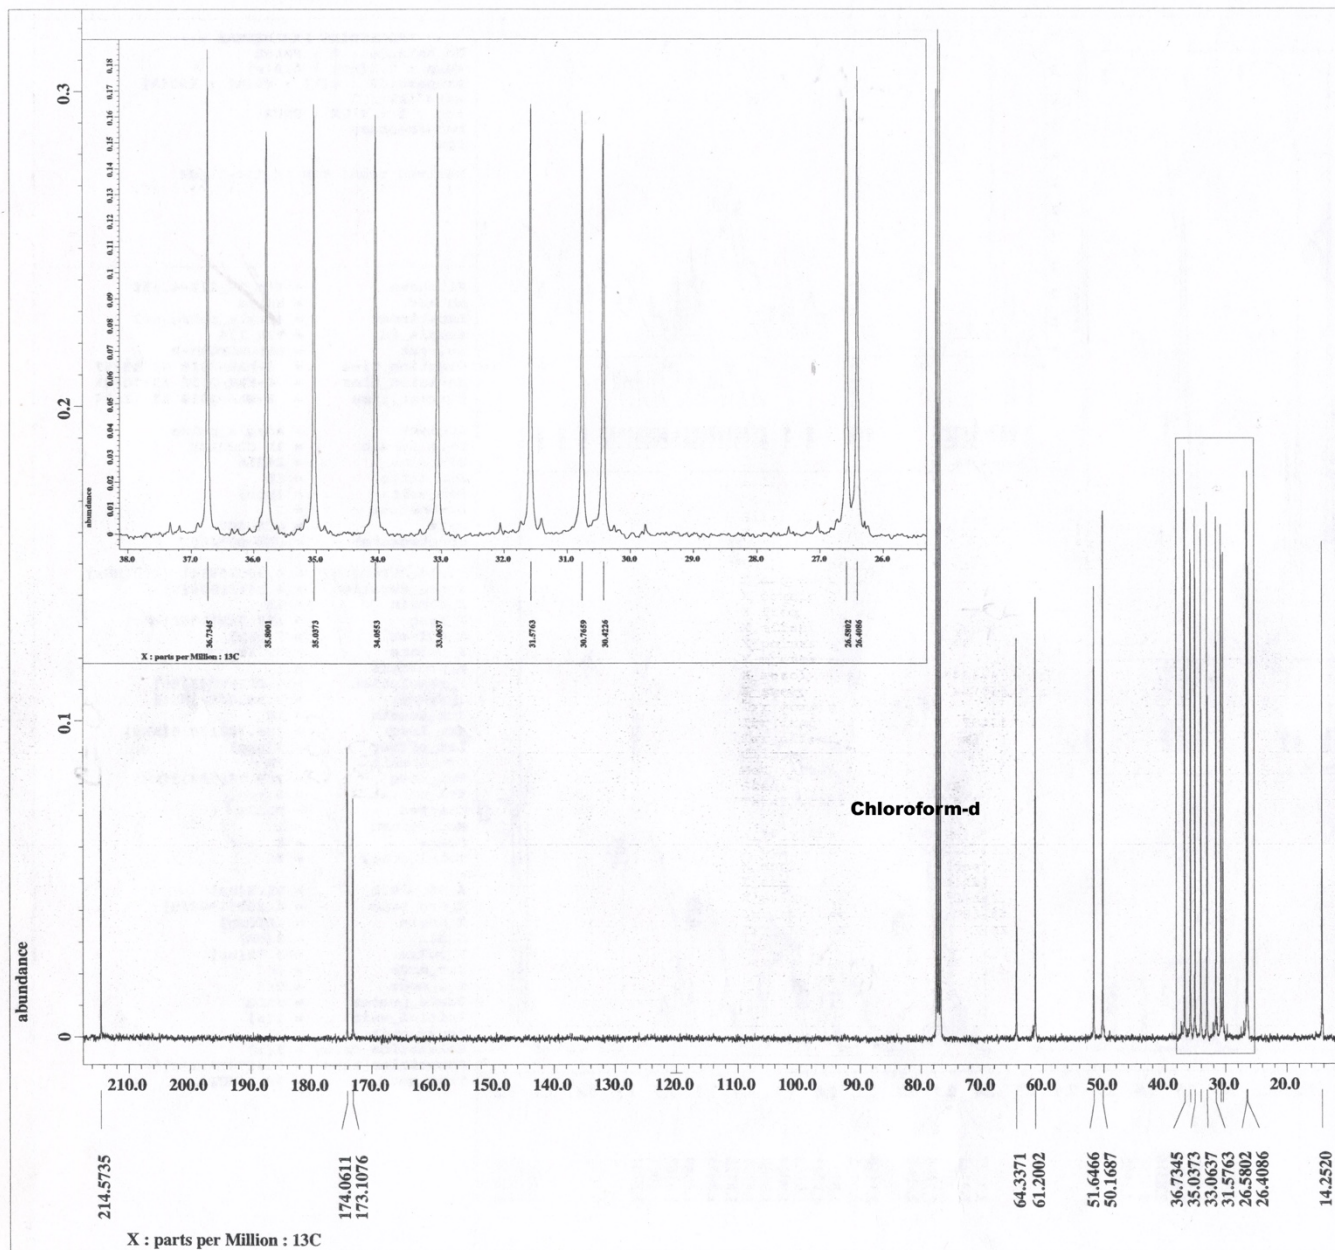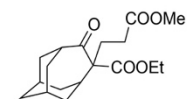

Filename = TIM\_13C\_114-4.jdf  
 Author = delta  
 Experiment = single\_pulse\_dec  
 Sample\_id = TIM\_114  
 Solvent = CHLOROFORM-D  
 Creation\_time = 6-MAR-2018 09:32:12  
 Revision\_time = 6-MAR-2018 13:11:37  
 Current\_time = 6-MAR-2018 13:11:50

Comment = single pulse decouple  
 Data\_format = 1D COMPLEX  
 Dim\_size = 26214  
 Dim\_title = 13C  
 Dim\_units = [ppm]  
 Dimensions = X  
 Site = ECX 400  
 Spectrometer = JNM-ECX400

Field\_strength = 9.389766[T] (400[MHz])  
 X\_acq\_duration = 1.04333312[s]  
 X\_domain = 13C  
 X\_freq = 100.52530333[MHz]  
 X\_offset = 120[ppm]  
 X\_points = 32768  
 X\_prescans = 4  
 X\_resolution = 0.95846665[Hz]  
 X\_sweep = 31.40703518[kHz]  
 Irr\_domain = 1H  
 Irr\_freq = 399.78219838[MHz]  
 Irr\_offset = 5[ppm]  
 Clipped = FALSE  
 Mod\_return = 1  
 Scans = 1000  
 Total\_scans = 1000

X\_90\_width = 8.16[us]  
 X\_acq\_time = 1.04333312[s]  
 X\_angle = 30[deg]  
 X\_atn = 7.8[db]  
 X\_pulse = 2.72[us]  
 Irr\_atn\_dec = 22.703[db]  
 Irr\_atn\_noe = 22.703[db]  
 Irr\_noise = WALTZ  
 Decoupling = TRUE  
 Initial\_wait = 1[s]  
 Noe = TRUE  
 Noe\_time = 2[s]  
 Recvr\_gain = 46  
 Relaxation\_delay = 2[s]  
 Repetition\_time = 3.04333312[s]  
 Temp\_get = 20.2[dc]



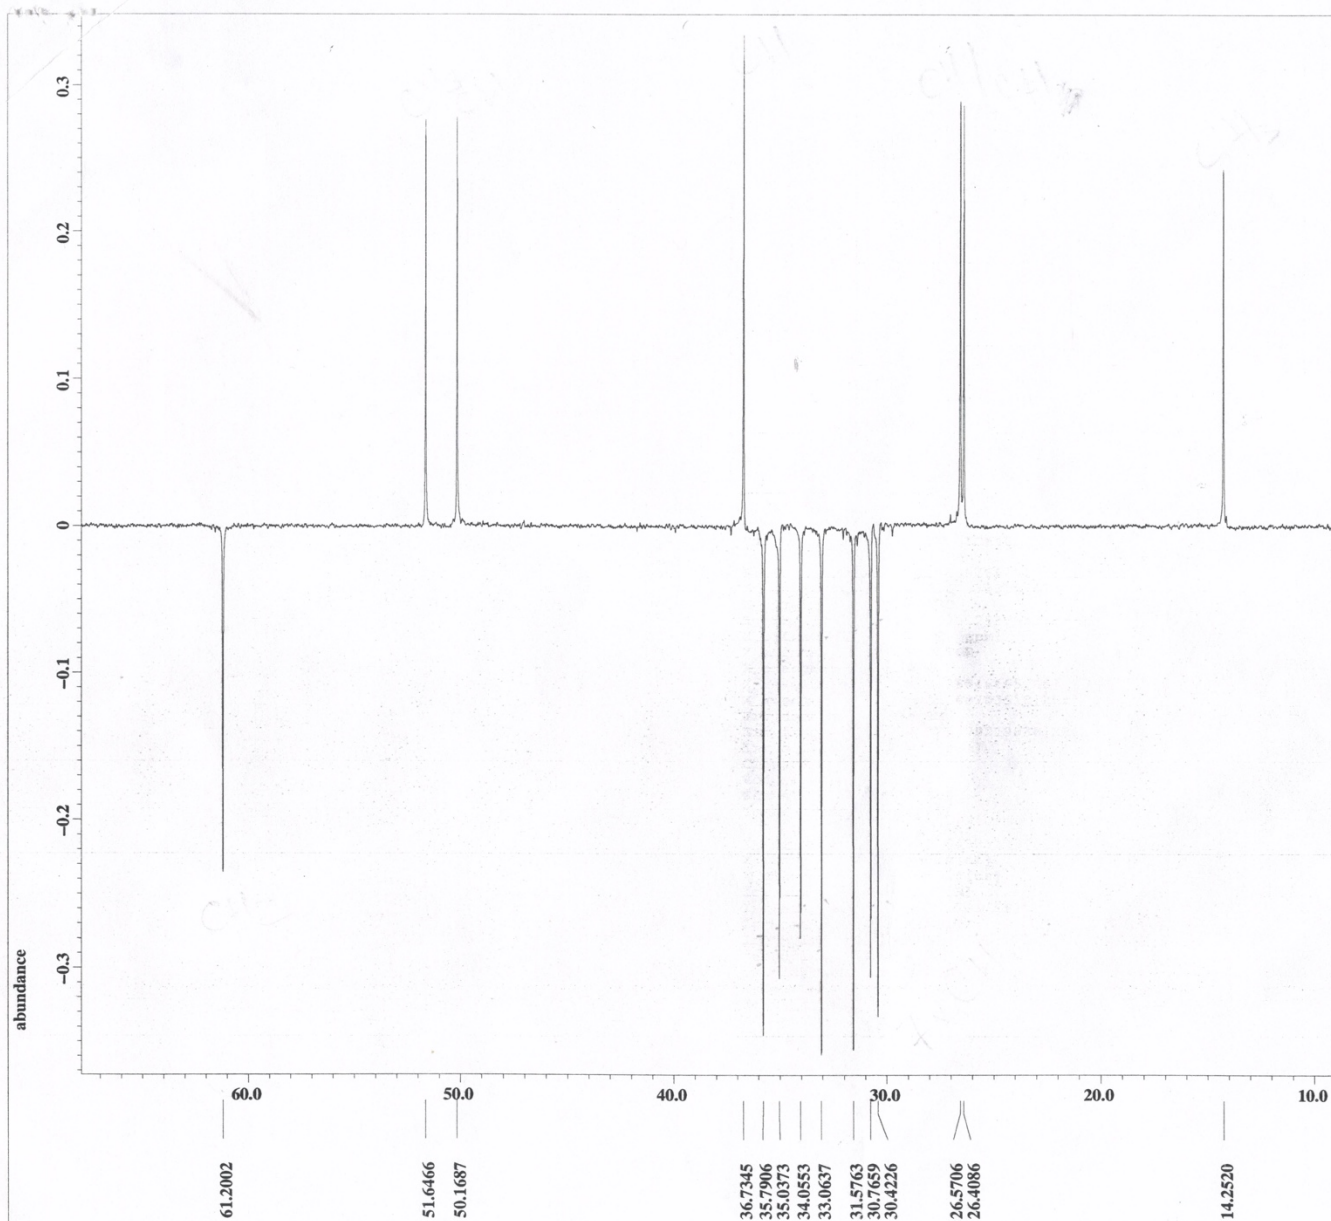

X : parts per Million : 13C

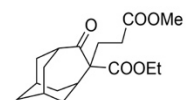

Filename = TIM\_DEPT135\_114-4.jdf  
 Author = delta  
 Experiment = dept.ex2  
 Sample\_id = TIM\_114  
 Solvent = CHLOROFORM-D  
 Creation\_time = 6-MAR-2018 09:58:04  
 Revision\_time = 6-MAR-2018 13:12:00  
 Current\_time = 6-MAR-2018 13:12:04

Comment = DEPT with decoupling  
 Data\_format = 1D COMPLEX  
 Dim\_size = 26214  
 Dim\_title = 13C  
 Dim\_units = [ppm]  
 Dimensions = X  
 Site = ECX 400  
 Spectrometer = JNM-ECX400

Field\_strength = 9.389766[T] (400[MHz])  
 X\_acq\_duration = 1.0433312[s]  
 X\_domain = 13C  
 X\_freq = 100.52530333[MHz]  
 X\_offset = 120[ppm]  
 X\_points = 32768  
 X\_prescans = 4  
 X\_resolution = 0.95846665[Hz]  
 X\_sweep = 31.40703518[kHz]  
 Irr\_domain = 1H  
 Irr\_freq = 399.78219838[MHz]  
 Irr\_offset = 5[ppm]  
 Clipped = FALSE  
 Mod\_return = 1  
 Scans = 500  
 Total\_scans = 500

X\_acq\_time = 1.0433312[s]  
 X\_atn = 7.8[db]  
 X\_pulse = 8.16[us]  
 Irr\_atn = 3[db]  
 Irr\_atn\_dec = 22.703[db]  
 Irr\_noise = WALTZ  
 Irr\_pulse = 11.9[us]  
 Decoupling = TRUE  
 Initial\_wait = 1[s]  
 J\_constant = 140[Hz]  
 Recvr\_gain = 46  
 Relaxation\_delay = 2[s]  
 Selection\_angle = 135[deg]  
 Selection\_pulse = 17.85[us]  
 Temp\_get = 20[dc]



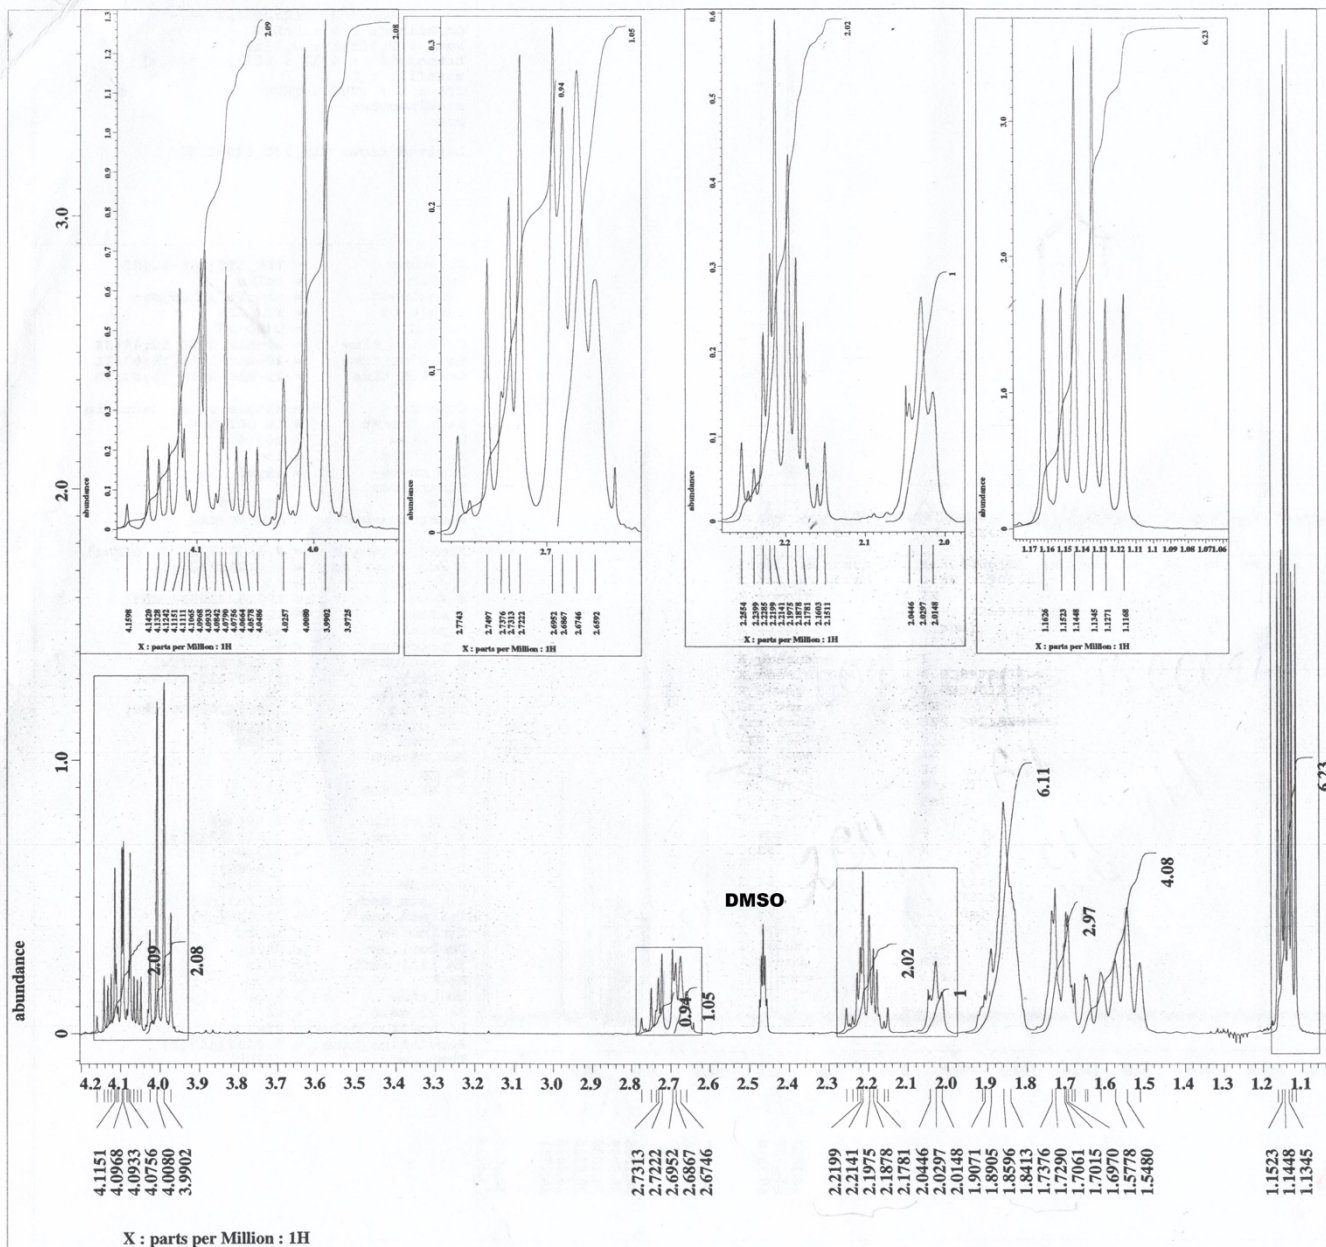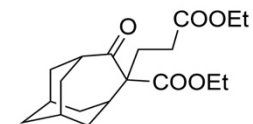

Filename = TIM\_1H\_125-4.jdf  
 Author = delta  
 Experiment = single\_pulse.ex2  
 Sample\_id = TIM\_125  
 Solvent = DMSO-D6  
 Creation\_time = 29-MAR-2018 15:42:37  
 Revision\_time = 29-MAR-2018 18:01:23  
 Current\_time = 29-MAR-2018 18:02:54  
 Comment = single\_pulse  
 Data\_format = 1D\_COMPLEX  
 Dim\_size = 26214  
 Dim\_title = 1H  
 Dim\_units = [ppm]  
 Dimensions = X  
 Site = ECX 400  
 Spectrometer = JNM-ECX400  
 Field\_strength = 9.389766[T] (400[MHz])  
 X\_acq\_duration = 4.36731904[s]  
 X\_domain = 1H  
 X\_freq = 399.78219838[MHz]  
 X\_offset = 7[ppm]  
 X\_points = 32768  
 X\_prescans = 1  
 X\_resolution = 0.22897343[Hz]  
 X\_sweep = 7.5030012[kHz]  
 Irr\_domain = 1H  
 Irr\_freq = 399.78219838[MHz]  
 Irr\_offset = 5[ppm]  
 Tri\_domain = 1H  
 Tri\_freq = 399.78219838[MHz]  
 Tri\_offset = 5[ppm]  
 Clipped = FALSE  
 Mod\_return = 1  
 Scans = 8  
 Total\_scans = 8  
 X\_90\_width = 11.9[us]  
 X\_acq\_time = 4.36731904[s]  
 X\_angle = 45[deg]  
 X\_atn = 3[db]  
 X\_pulse = 5.95[us]  
 Irr\_mode = Off  
 Tri\_mode = Off  
 Dante\_presat = FALSE  
 Initial\_wait = 1[s]  
 Recvr\_gain = 30  
 Relaxation\_delay = 5[s]  
 Repetition\_time = 9.36731904[s]  
 Temp\_get = 19.9[dc]



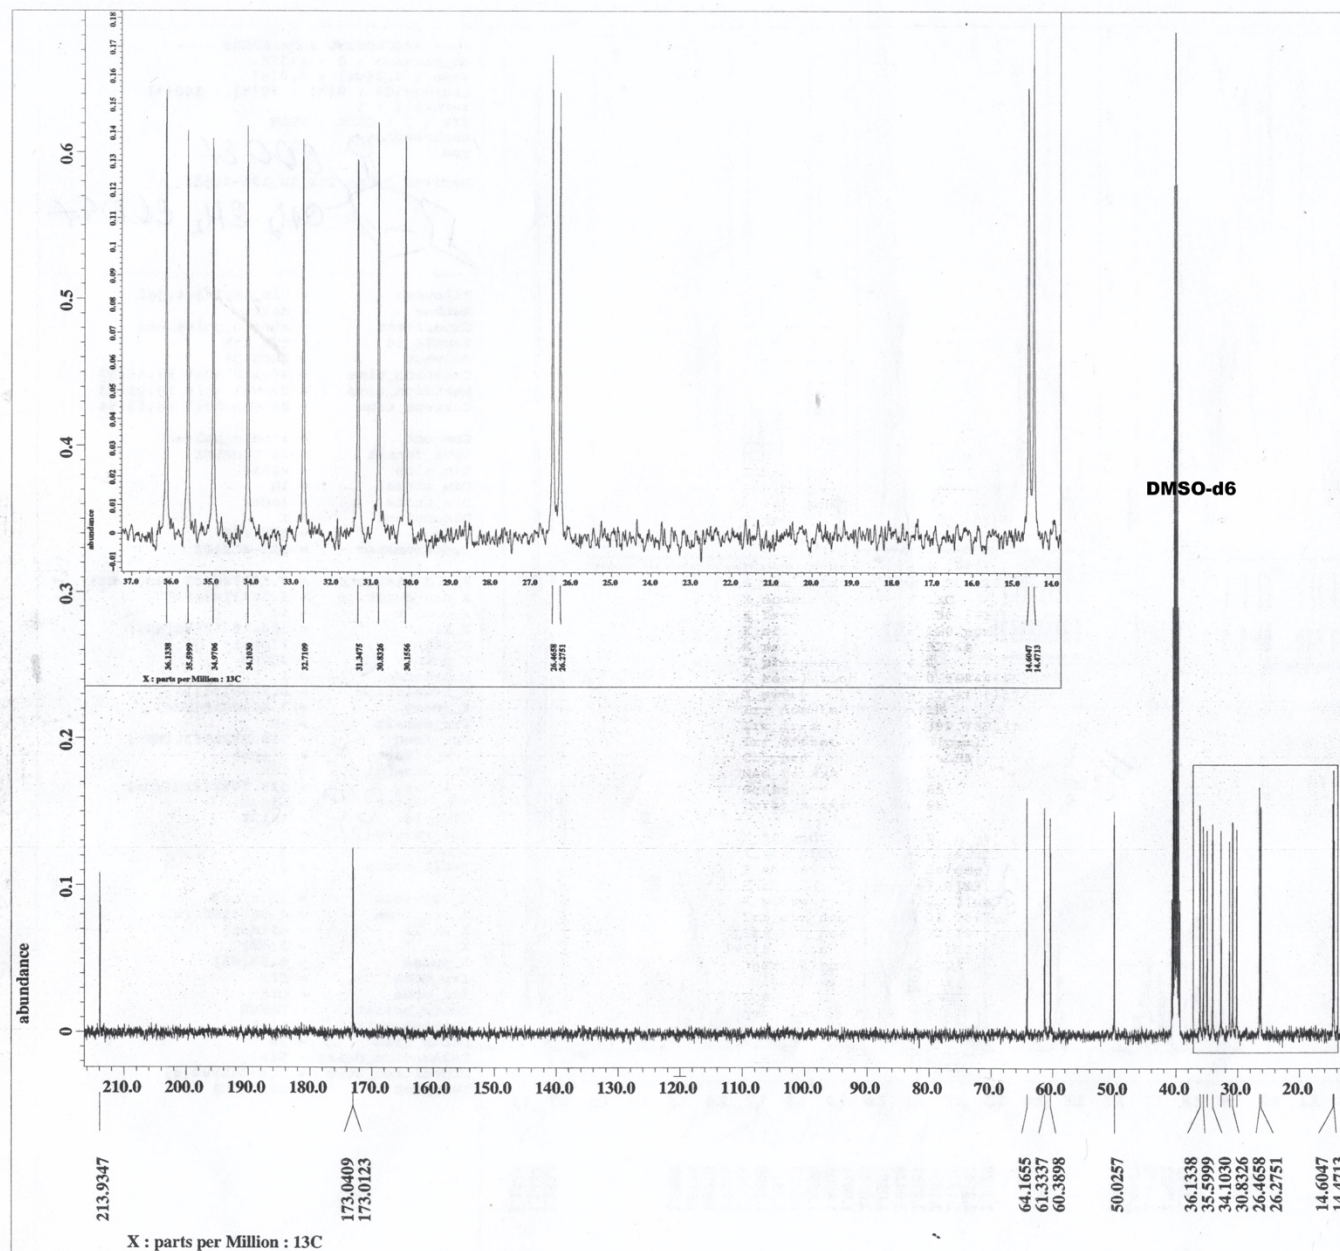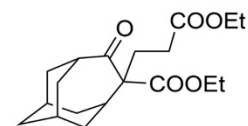

Filename = TIM\_13C\_125-4.jdf  
 Author = delta  
 Experiment = single\_pulse\_dec  
 Sample\_id = TIM\_125  
 Solvent = DMSO-D6  
 Creation\_time = 29-MAR-2018 15:48:24  
 Revision\_time = 29-MAR-2018 18:03:11  
 Current\_time = 29-MAR-2018 18:03:28  
 Comment = single pulse decouple  
 Data\_format = 1D COMPLEX  
 Dim\_size = 26214  
 Dim\_title = 13C  
 Dim\_units = [ppm]  
 Dimensions = X  
 Site = ECX 400  
 Spectrometer = JNM-ECK400  
 Field\_strength = 9.389766[T] (400 [MHz])  
 X\_acq\_duration = 1.04333312[s]  
 X\_domain = 13C  
 X\_freq = 100.52530333 [MHz]  
 X\_offset = 120 [ppm]  
 X\_points = 32768  
 X\_prescans = 4  
 X\_resolution = 0.95846665 [Hz]  
 X\_sweep = 31.40703518 [kHz]  
 Irr\_domain = 1H  
 Irr\_freq = 399.78219838 [MHz]  
 Irr\_offset = 5 [ppm]  
 Clipped = FALSE  
 Mod\_return = 1  
 Scans = 65  
 Total\_scans = 65  
 X\_90\_width = 8.16 [us]  
 X\_acq\_time = 1.04333312 [s]  
 X\_angle = 30 [deg]  
 X\_atn = 7.8 [dB]  
 X\_pulse = 2.72 [us]  
 Irr\_atn\_dec = 22.703 [dB]  
 Irr\_atn\_noe = 22.703 [dB]  
 Irr\_noise = WALTZ  
 Decoupling = TRUE  
 Initial\_wait = 1 [s]  
 Noe = TRUE  
 Noe\_time = 2 [s]  
 Recvr\_gain = 46  
 Relaxation\_delay = 2 [s]  
 Repetition\_time = 3.04333312 [s]  
 Temp\_get = 20 [dC]



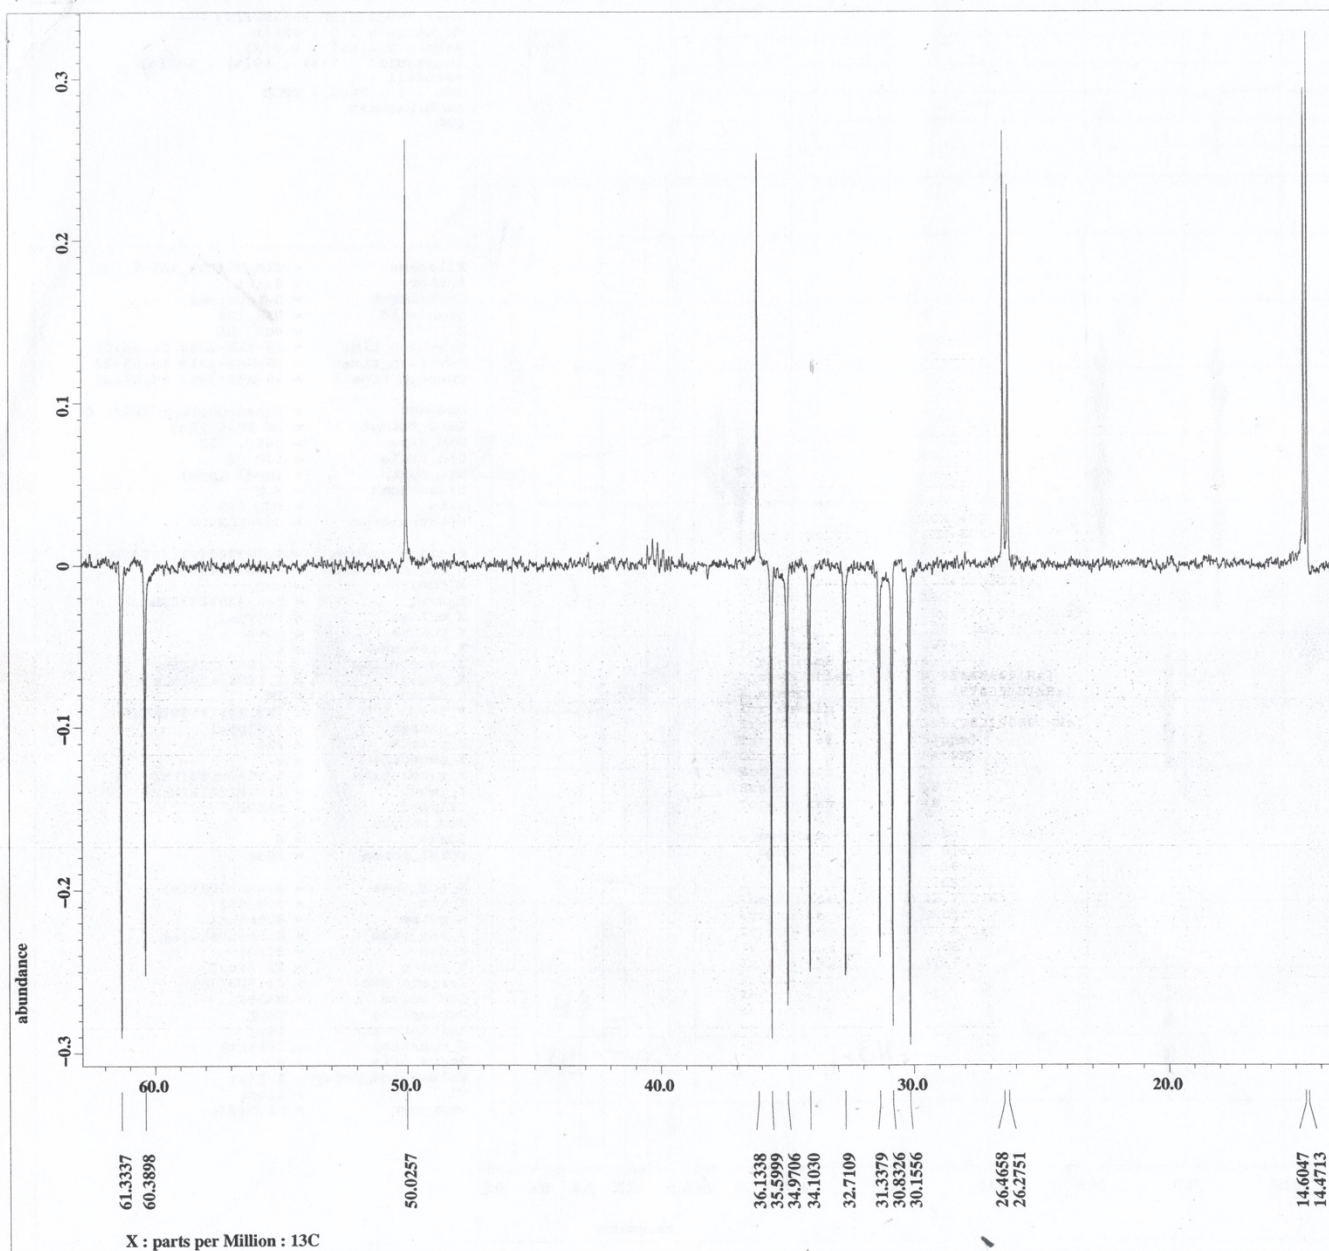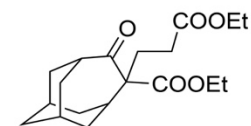

Filename = TIM\_DEPT135\_125-4.jdf  
 Author = delta  
 Experiment = dept.ex2  
 Sample\_id = TIM\_125  
 Solvent = DMSO-D6  
 Creation\_time = 29-MAR-2018 15:52:13  
 Revision\_time = 29-MAR-2018 15:01:26  
 Current\_time = 29-MAR-2018 18:03:44

Comment = DEPT with decoupling  
 Data\_format = 1D COMPLEX  
 Dim\_size = 26214  
 Dim\_title = 13C  
 Dim\_units = [ppm]  
 Dimensions = X  
 Site = ECX 400  
 Spectrometer = JNM-ECX400

Field\_strength = 9.389766[T] (400[MHz])  
 X\_acq\_duration = 1.04333312[s]  
 X\_domain = 13C  
 X\_freq = 100.52530333[MHz]  
 X\_offset = 120[ppm]  
 X\_points = 32768  
 X\_prescans = 4  
 X\_resolution = 0.95846665[Hz]  
 X\_sweep = 31.40703518[kHz]  
 Irr\_domain = 1H  
 Irr\_freq = 399.78219838[MHz]  
 Irr\_offset = 5[ppm]  
 Clipped = FALSE  
 Mod\_return = 1  
 Scans = 68  
 Total\_scans = 68

X\_acq\_time = 1.04333312[s]  
 X\_atn = 7.8[db]  
 X\_pulse = 8.16[us]  
 Irr\_atn = 3[db]  
 Irr\_atn\_dec = 22.703[db]  
 Irr\_noise = WALTZ  
 Irr\_pulse = 11.9[us]  
 Decoupling = TRUE  
 Initial\_wait = 1[s]  
 J\_constant = 140[Hz]  
 Recvr\_gain = 46  
 Relaxation\_delay = 2[s]  
 Selection\_angle = 135[deg]  
 Selection\_pulse = 17.85[us]  
 Temp\_get = 19.9[dc]



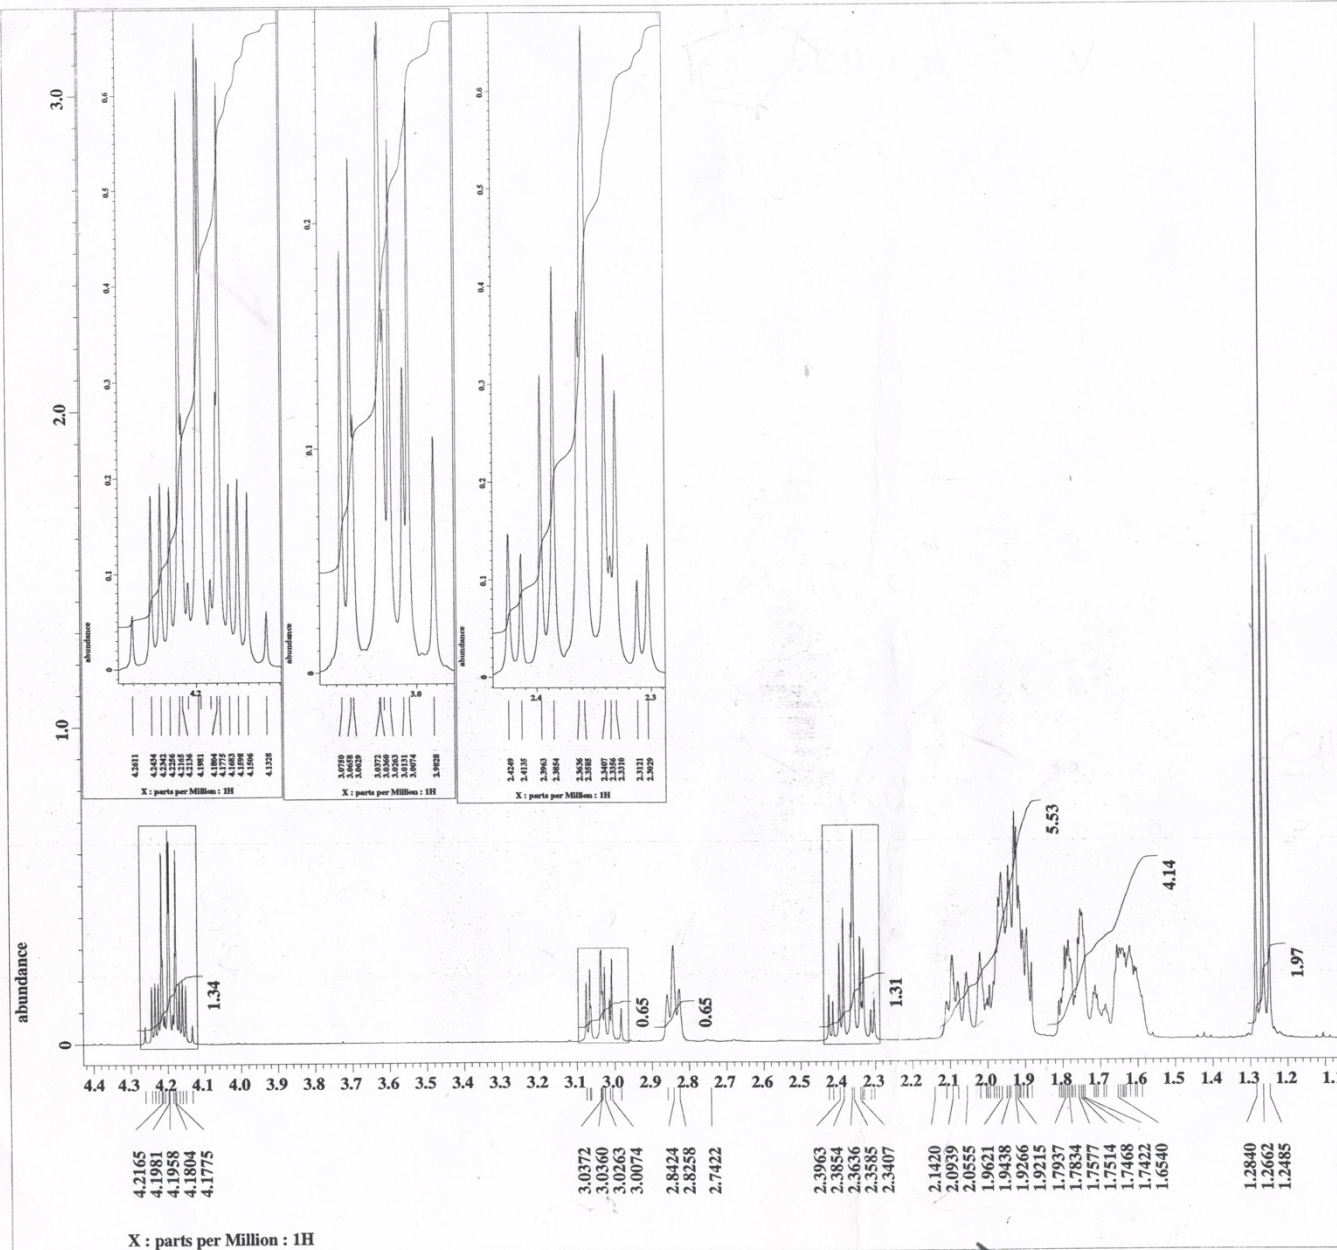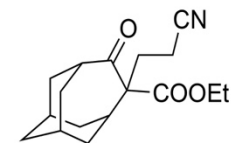

Filename = TIM\_1H\_106-4.jdf  
 Author = delta  
 Experiment = single\_pulse.ex2  
 Sample\_id = TIM\_106  
 Solvent = CHLOROFORM-D  
 Creation\_time = 16-FEB-2018 04:37:01  
 Revision\_time = 16-FEB-2018 10:49:31  
 Current\_time = 16-FEB-2018 10:51:11

Comment = single pulse  
 Data\_format = 1D COMPLEX  
 Dim\_size = 26214  
 Dim\_title = 1H  
 Dim\_units = [ppm]  
 Dimensions = X  
 Site = ECK 400  
 Spectrometer = JNM-ECK400

Field\_strength = 9.389766[T] (400[MHz])  
 X\_acq\_duration = 4.36731904[s]  
 X\_domain = 1H  
 X\_freq = 399.78219838[MHz]  
 X\_offset = 7[ppm]  
 X\_points = 32768  
 X\_prescans = 1  
 X\_resolution = 0.22897343[Hz]  
 X\_sweep = 7.5030012[kHz]  
 Irr\_domain = 1H  
 Irr\_freq = 399.78219838[MHz]  
 Irr\_offset = 5[ppm]  
 Tri\_domain = 1H  
 Tri\_freq = 399.78219838[MHz]  
 Tri\_offset = 5[ppm]  
 Clipped = FALSE  
 Mod\_return = 1  
 Scans = 8  
 Total\_scans = 8

X\_90\_width = 11.9[us]  
 X\_acq\_time = 4.36731904[s]  
 X\_angle = 45[deg]  
 X\_atn = 3[db]  
 X\_pulse = 5.95[us]  
 Irr\_mode = Off  
 Tri\_mode = Off  
 Dante\_presat = FALSE  
 Initial\_wait = 1[s]  
 Recvr\_gain = 30  
 Relaxation\_delay = 5[s]  
 Repetition\_time = 9.36731904[s]  
 Temp\_get = 19.7[dc]



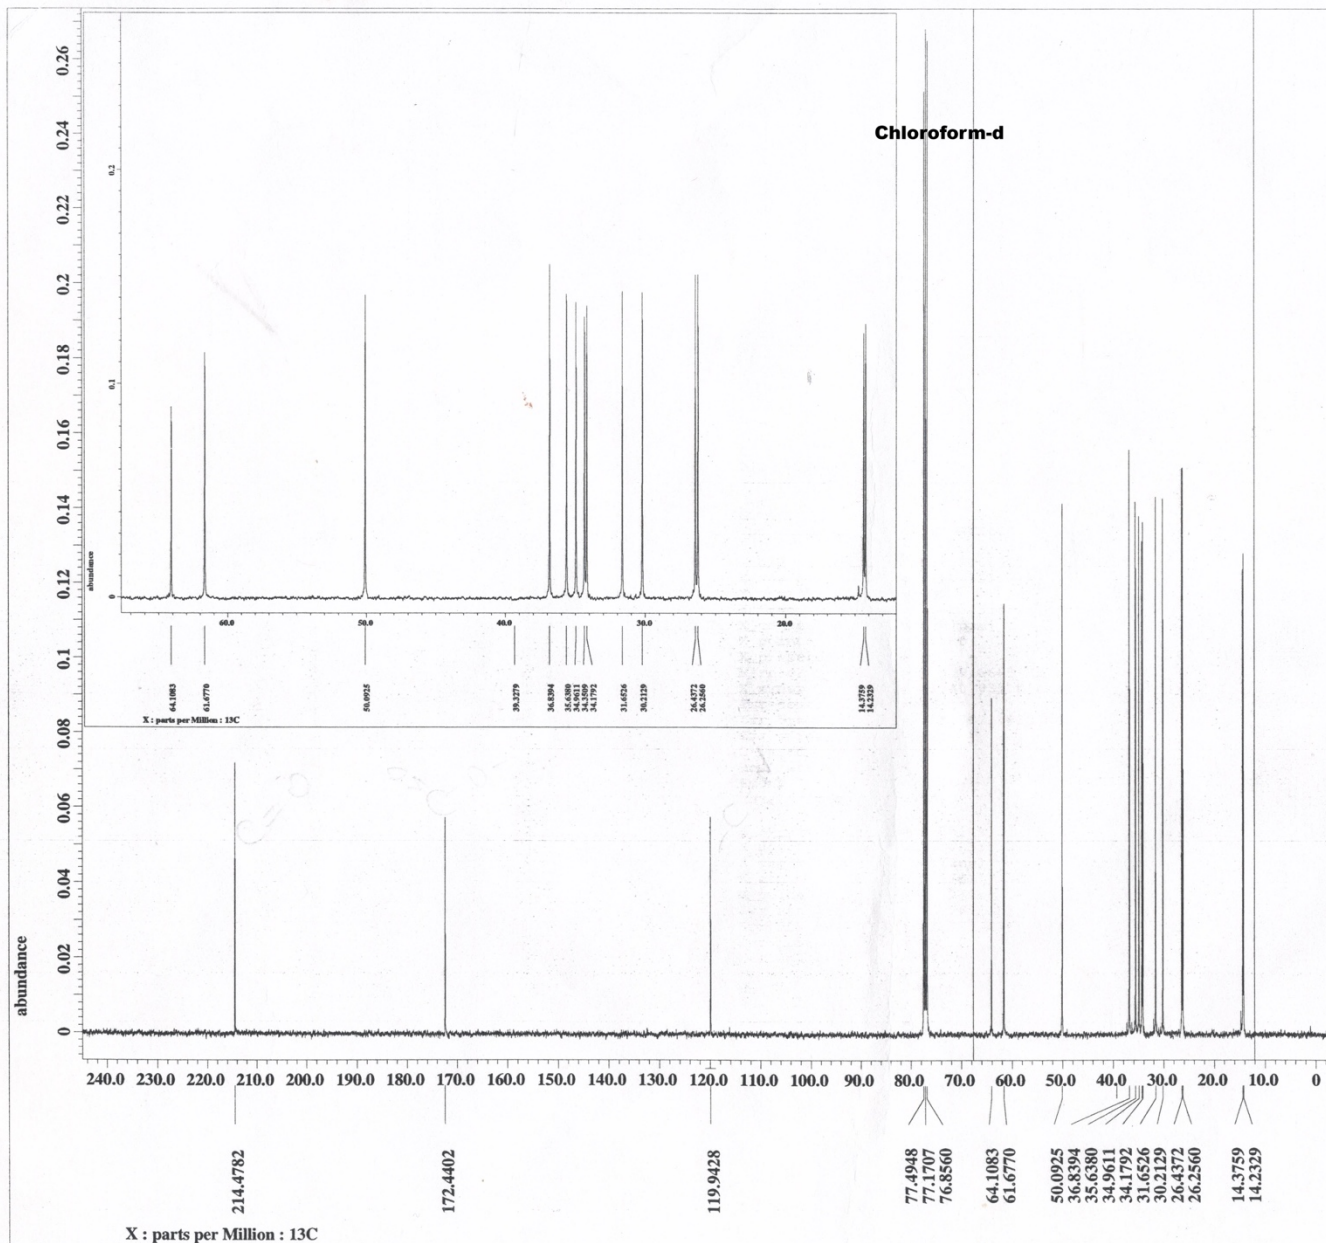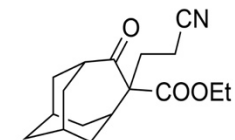

```

Filename      = TIM_13C_106-3.jdf
Author       = delta
Experiment    = single_pulse_dec
Sample_id     = TIM_106
Solvent       = CHLOROFORM-D
Creation_time = 16-FEB-2018 05:31:33
Revision_time = 16-FEB-2018 10:51:35
Current_time  = 16-FEB-2018 10:51:55

Comment      = single pulse decouple
Data_format   = 1D COMPLEX
Dim_size      = 26214
Dim_title     = 13C
Dim_units     = [ppm]
Dimensions    = X
Site          = ECX 400
Spectrometer  = JNM-ECX400

Field_strength = 9.389766[T] (400 [MHz])
X_acq_duration = 1.04333312[s]
X_domain       = 13C
X_freq         = 100.52530333 [MHz]
X_offset       = 120 [ppm]
X_points       = 32768
X_prescans     = 4
X_resolution   = 0.95846665 [Hz]
X_sweep        = 31.40703518 [kHz]
Irr_domain     = 1H
Irr_freq       = 399.78219838 [MHz]
Irr_offset     = 5 [ppm]
Clipped        = FALSE
Mod_return     = 1
Scans          = 1000
Total_scans    = 1000

X_90_width     = 8.16 [us]
X_acq_time     = 1.04333312 [s]
X_angle        = 30 [deg]
X_atn          = 7.8 [dB]
X_pulse        = 2.72 [us]
Irr_atn_dec    = 22.703 [dB]
Irr_atn_noe    = 22.703 [dB]
Irr_noise      = WALTZ
Decoupling     = TRUE
Initial_wait   = 1 [s]
Noe            = TRUE
Noe_time       = 2 [s]
Recvr_gain     = 44
Relaxation_delay = 2 [s]
Repetition_time = 3.04333312 [s]
Temp_get       = 20 [dc]
  
```



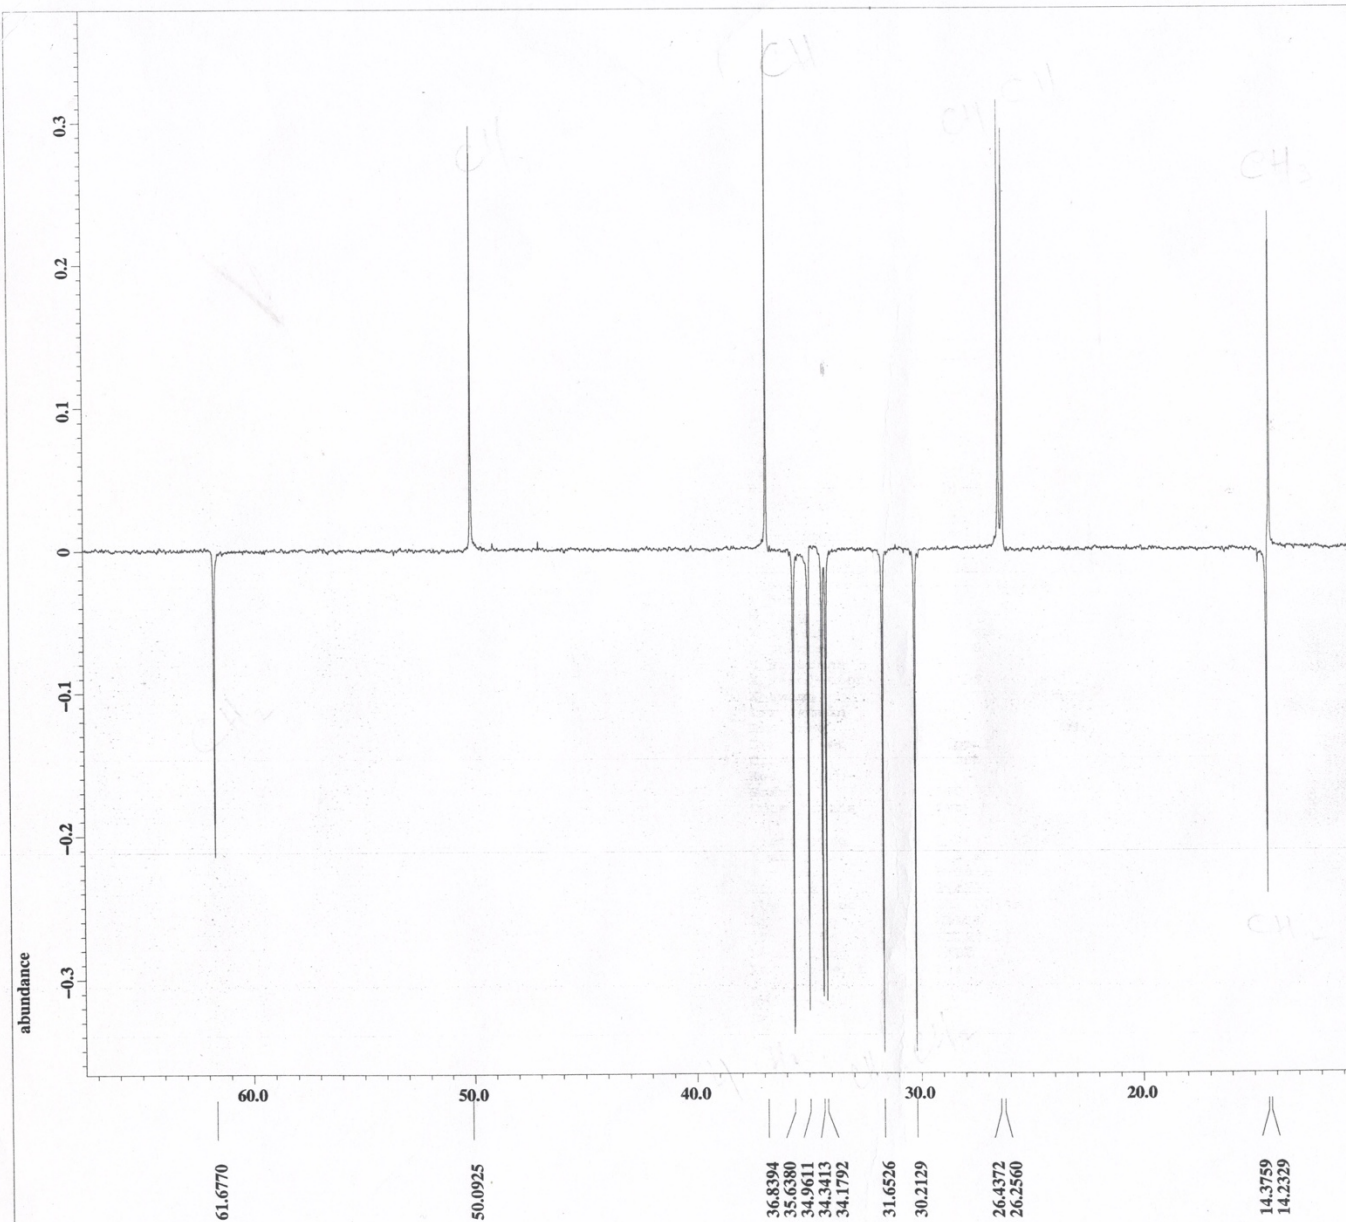

X : parts per Million : 13C

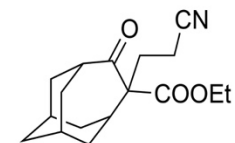

Filename = TIM\_DEPT135\_106-3.jdf  
 Author = delta  
 Experiment = dept.ex2  
 Sample\_id = TIM\_106  
 Solvent = CHLOROFORM-D  
 Creation\_time = 16-FEB-2018 05:57:23  
 Revision\_time = 16-FEB-2018 10:52:15  
 Current\_time = 16-FEB-2018 10:52:23

Comment = DEPT with decoupling  
 Data\_format = 1D COMPLEX  
 Dim\_size = 26214  
 Dim\_title = 13C  
 Dim\_units = [ppm]  
 Dimensions = X  
 Site = ECK 400  
 Spectrometer = JNM-ECX400

Field\_strength = 9.389766[T] (400[MHz])  
 X\_acq\_duration = 1.04333312[s]  
 X\_domain = 13C  
 X\_freq = 100.52530333[MHz]  
 X\_offset = 120[ppm]  
 X\_points = 32768  
 X\_prescans = 4  
 X\_resolution = 0.95846665[Hz]  
 X\_sweep = 31.40703518[kHz]  
 Irr\_domain = 1H  
 Irr\_freq = 399.78219838[MHz]  
 Irr\_offset = 5[ppm]  
 Clipped = FALSE  
 Mod\_return = 1  
 Scans = 500  
 Total\_scans = 500

X\_acq\_time = 1.04333312[s]  
 X\_atn = 7.8[dB]  
 X\_pulse = 8.16[us]  
 Irr\_atn = 3[dB]  
 Irr\_atn\_dec = 22.703[dB]  
 Irr\_noise = WALTZ  
 Irr\_pulse = 11.9[us]  
 Decoupling = TRUE  
 Initial\_wait = 1[s]  
 J\_constant = 140[Hz]  
 Recvr\_gain = 46  
 Relaxation\_delay = 2[s]  
 Selection\_angle = 135[deg]  
 Selection\_pulse = 17.85[us]  
 Temp\_get = 19.9[dc]





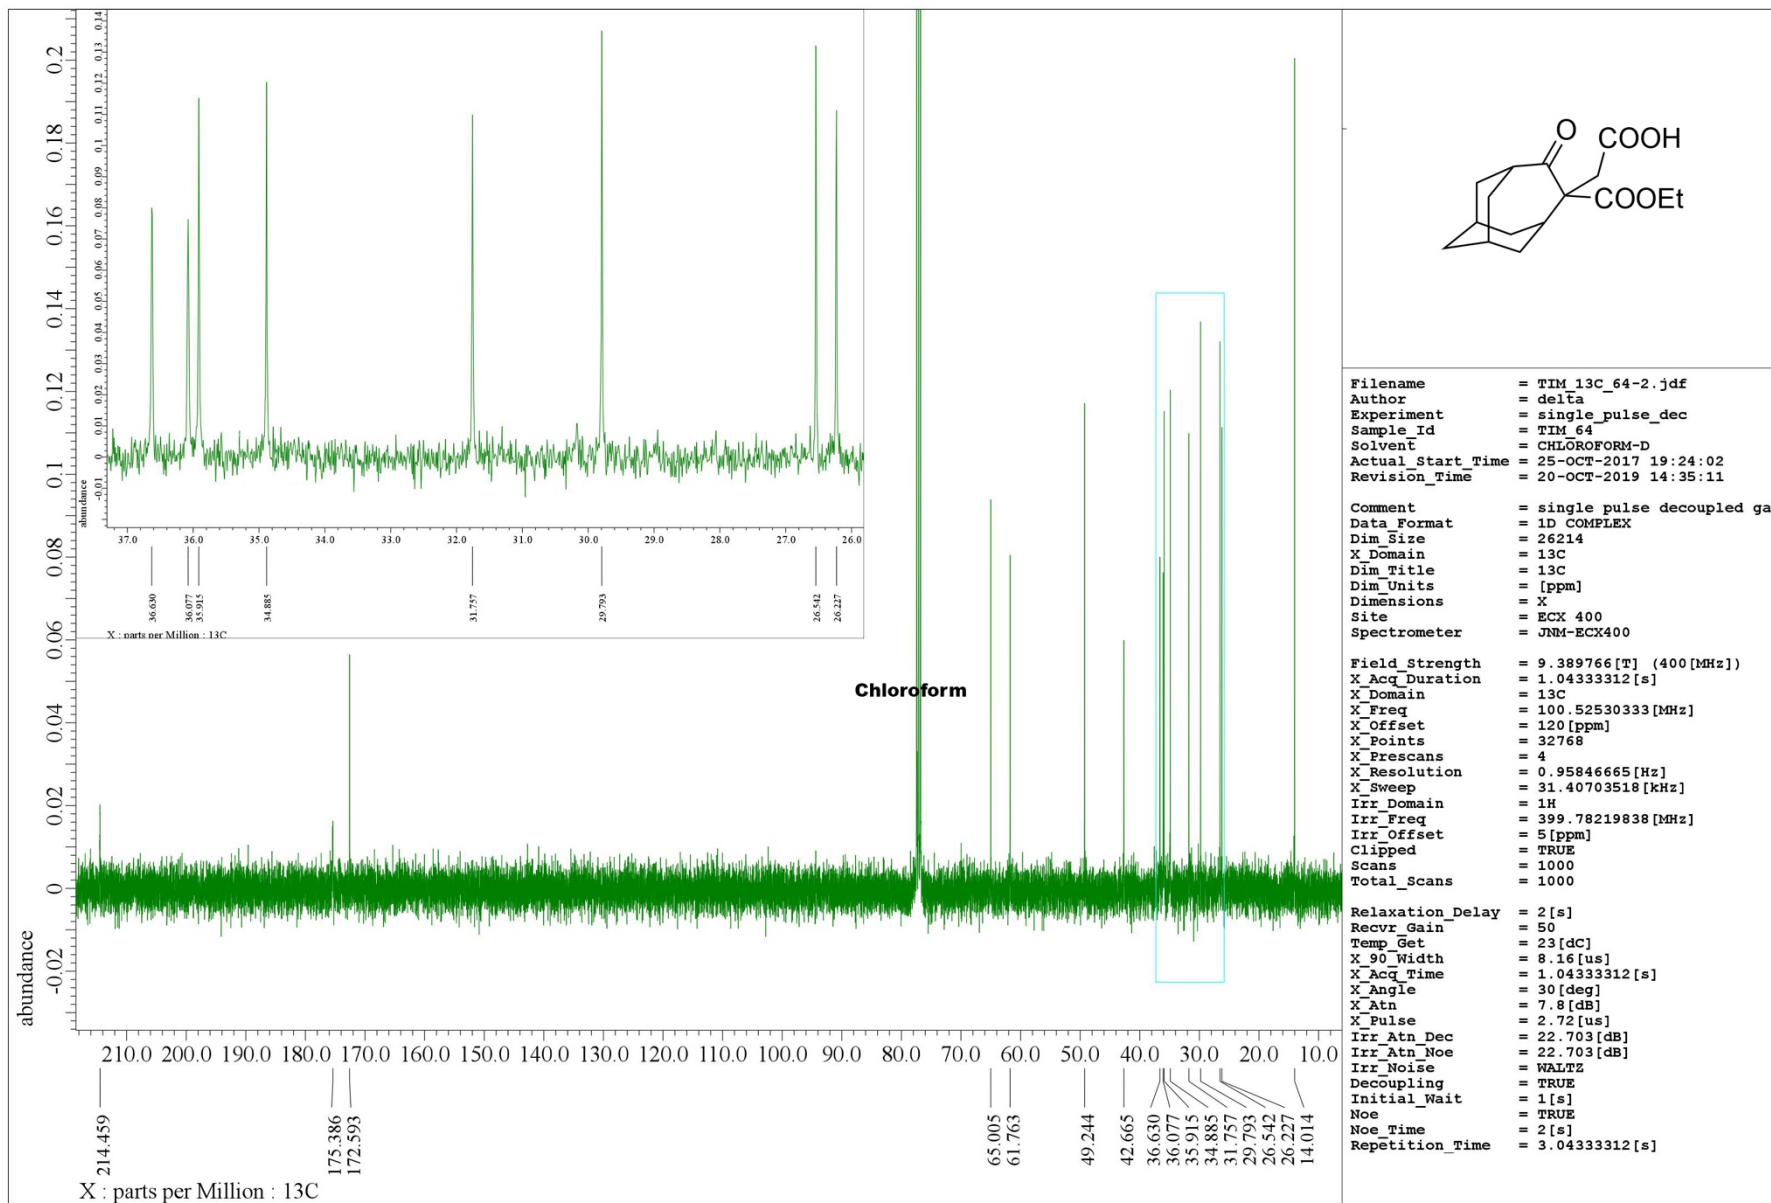

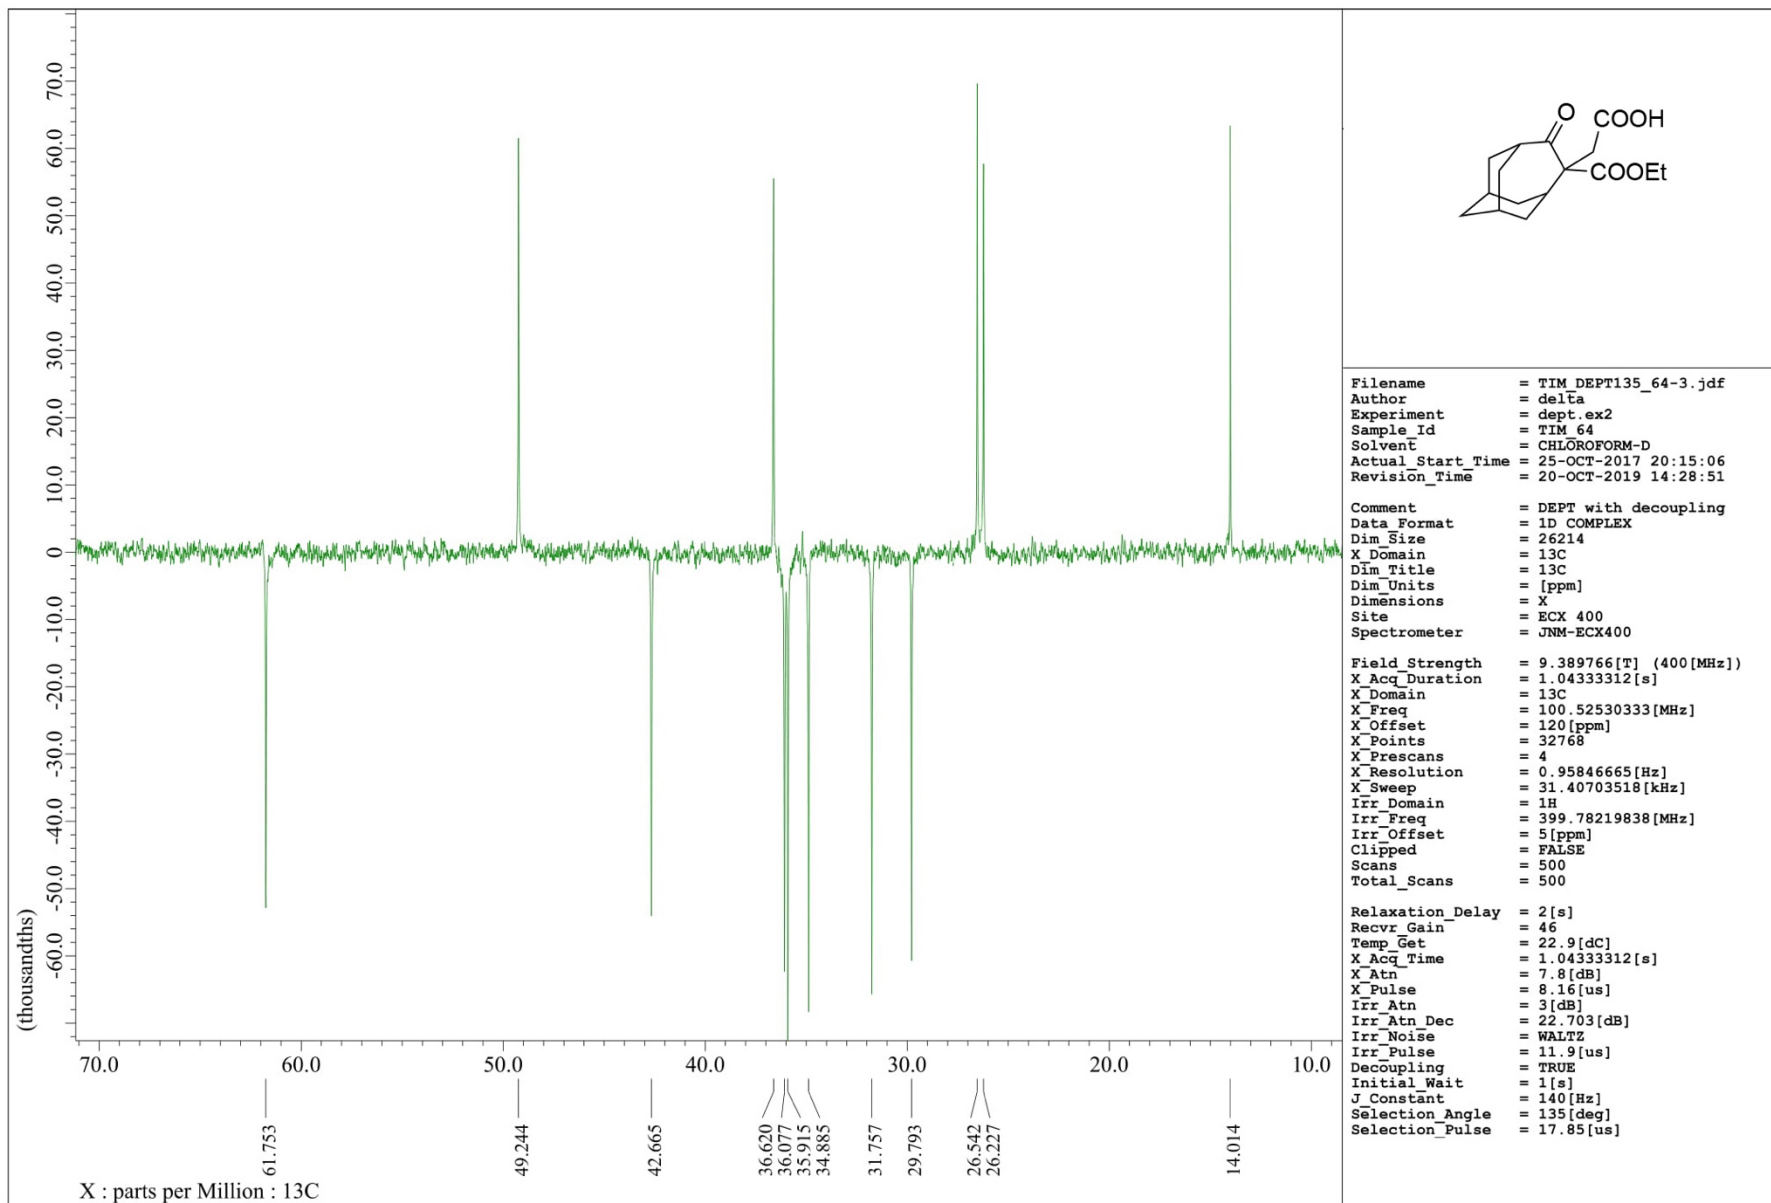



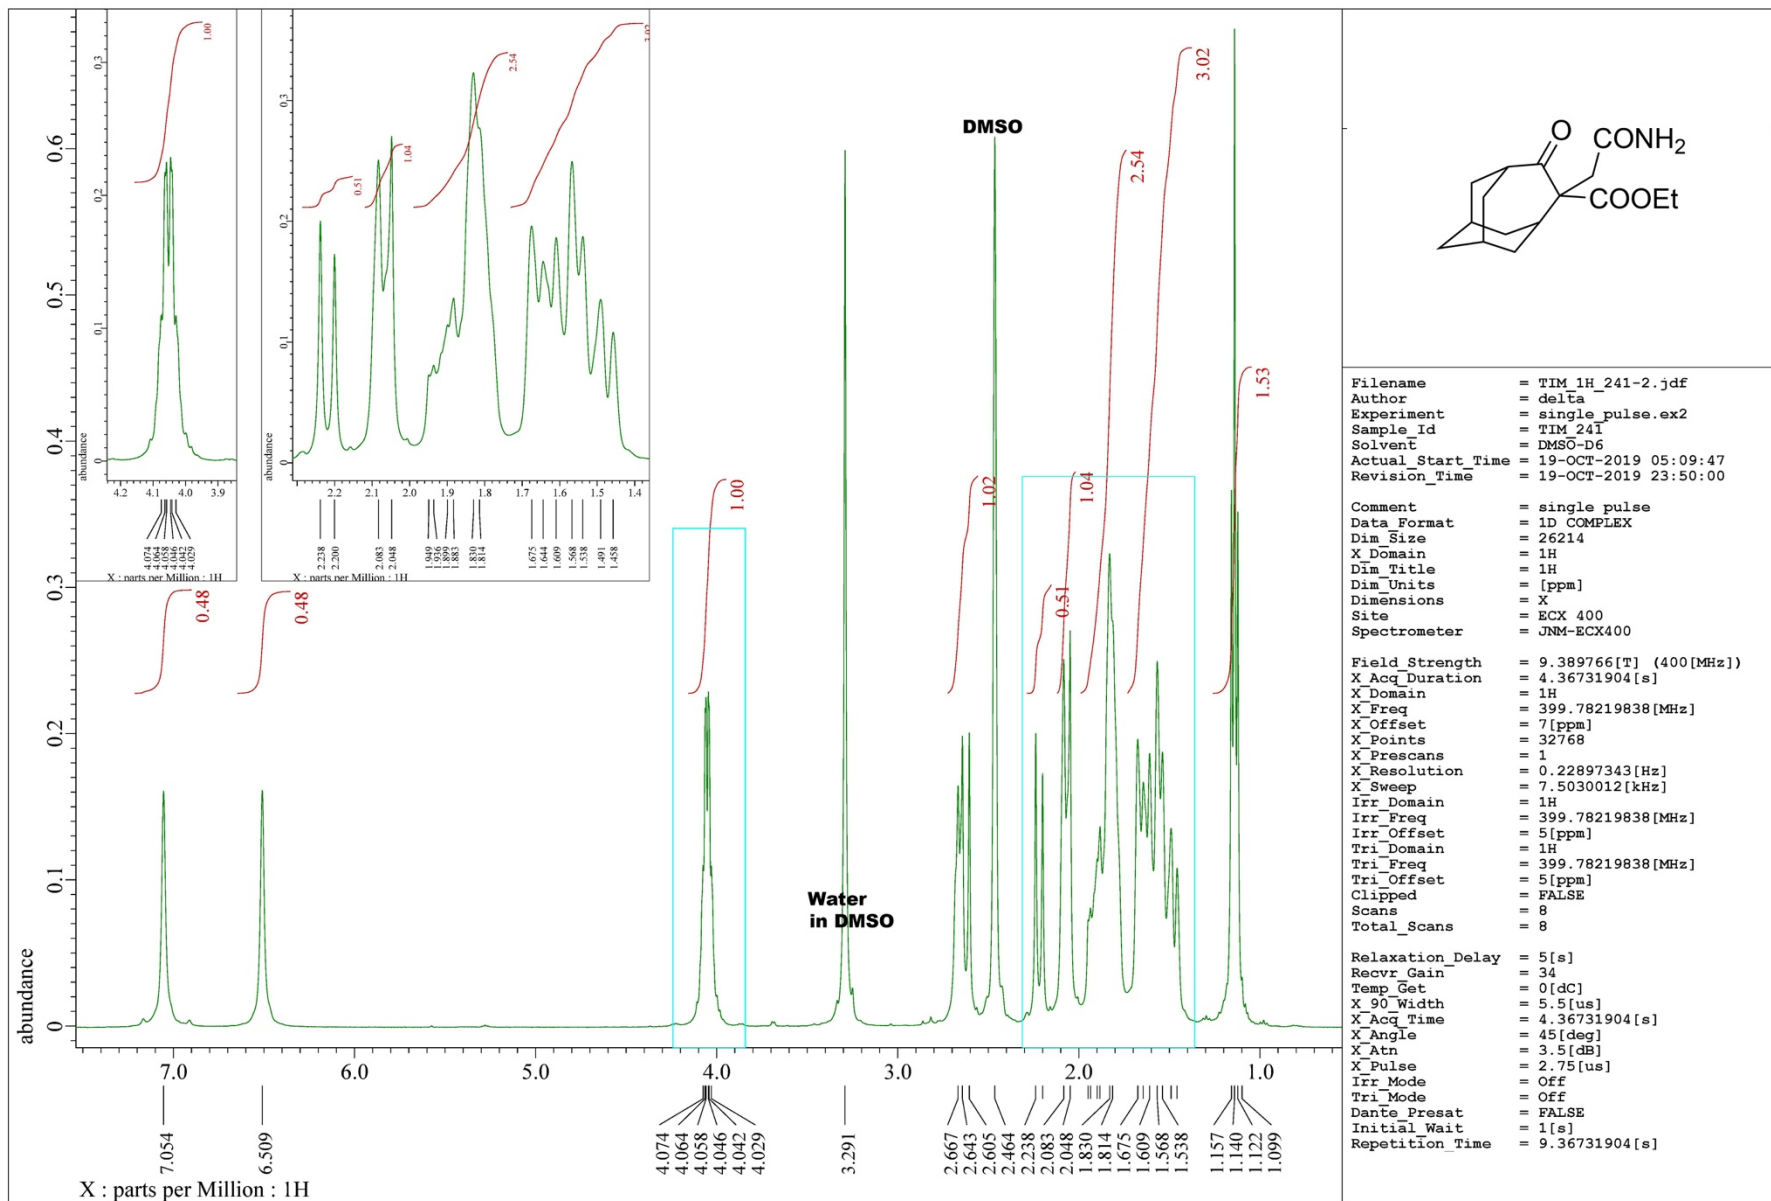

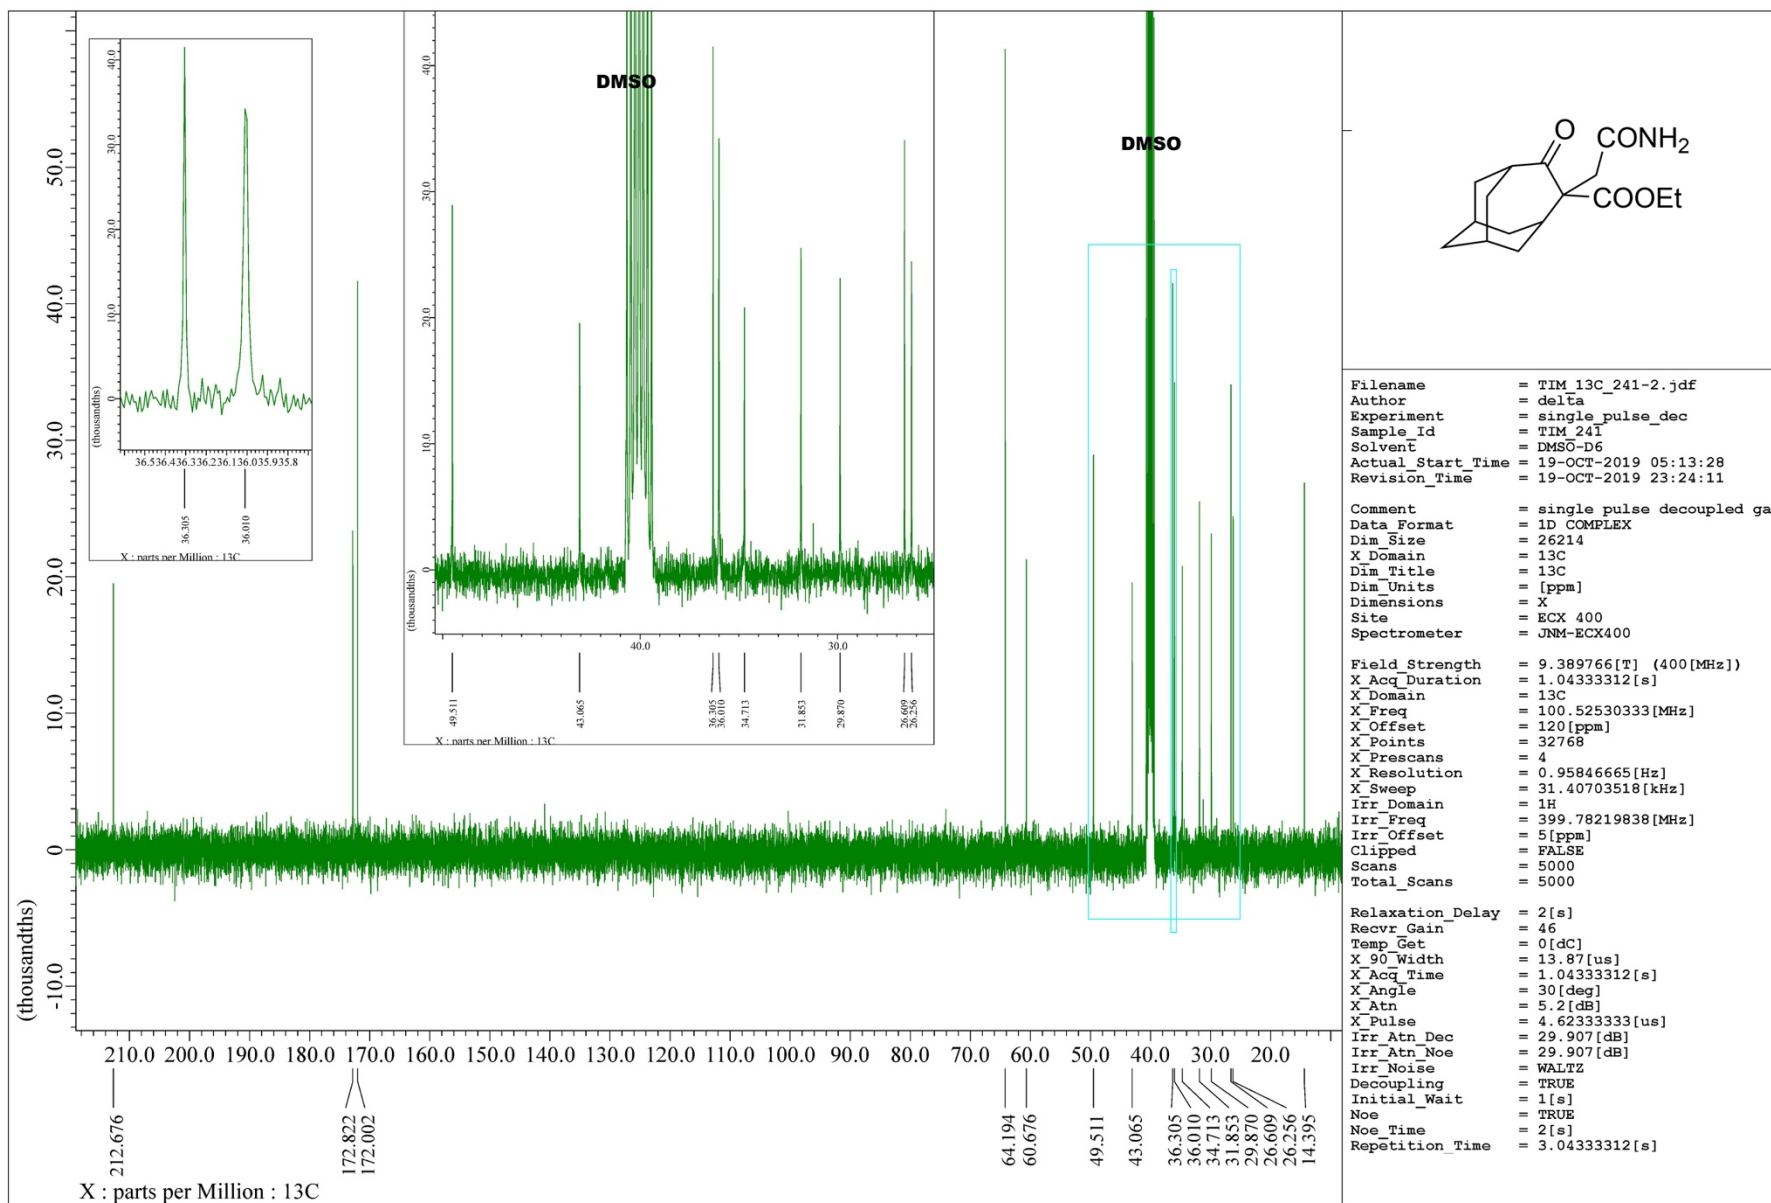



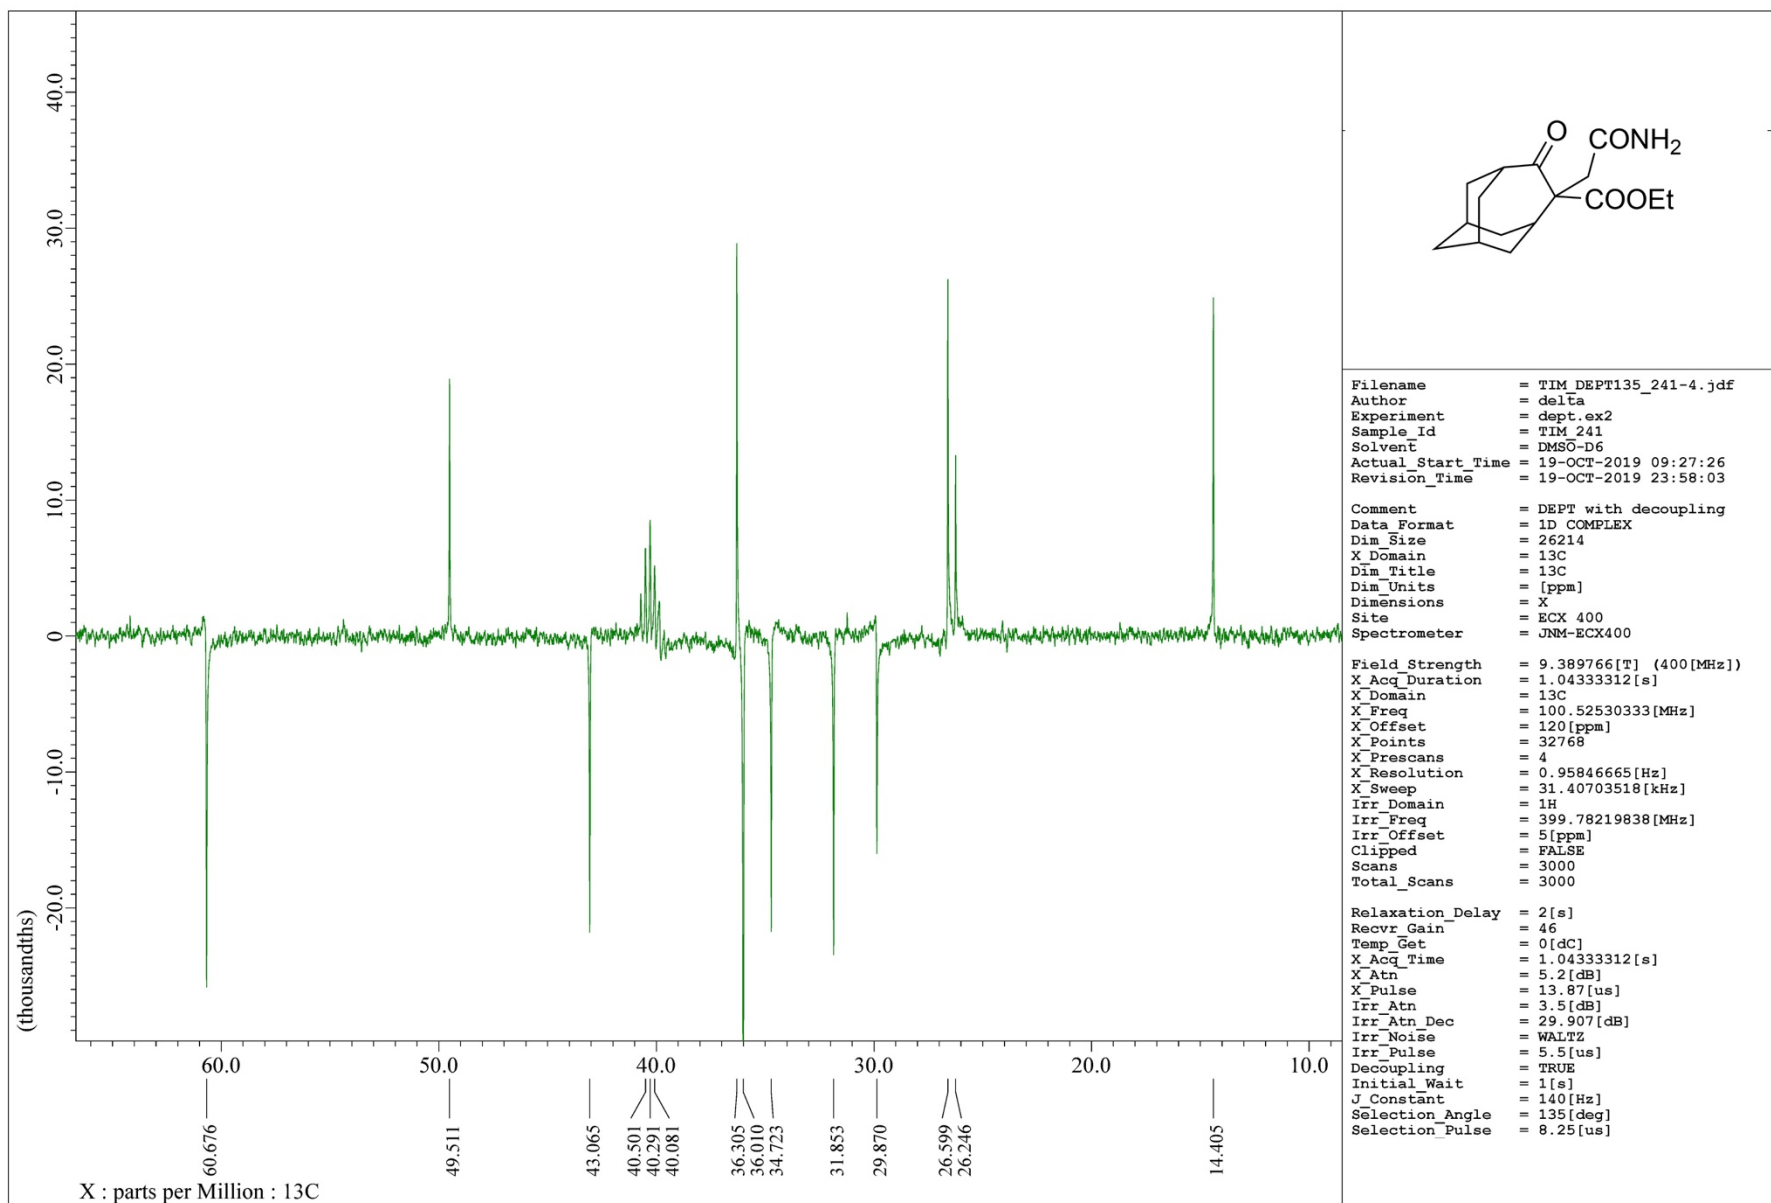

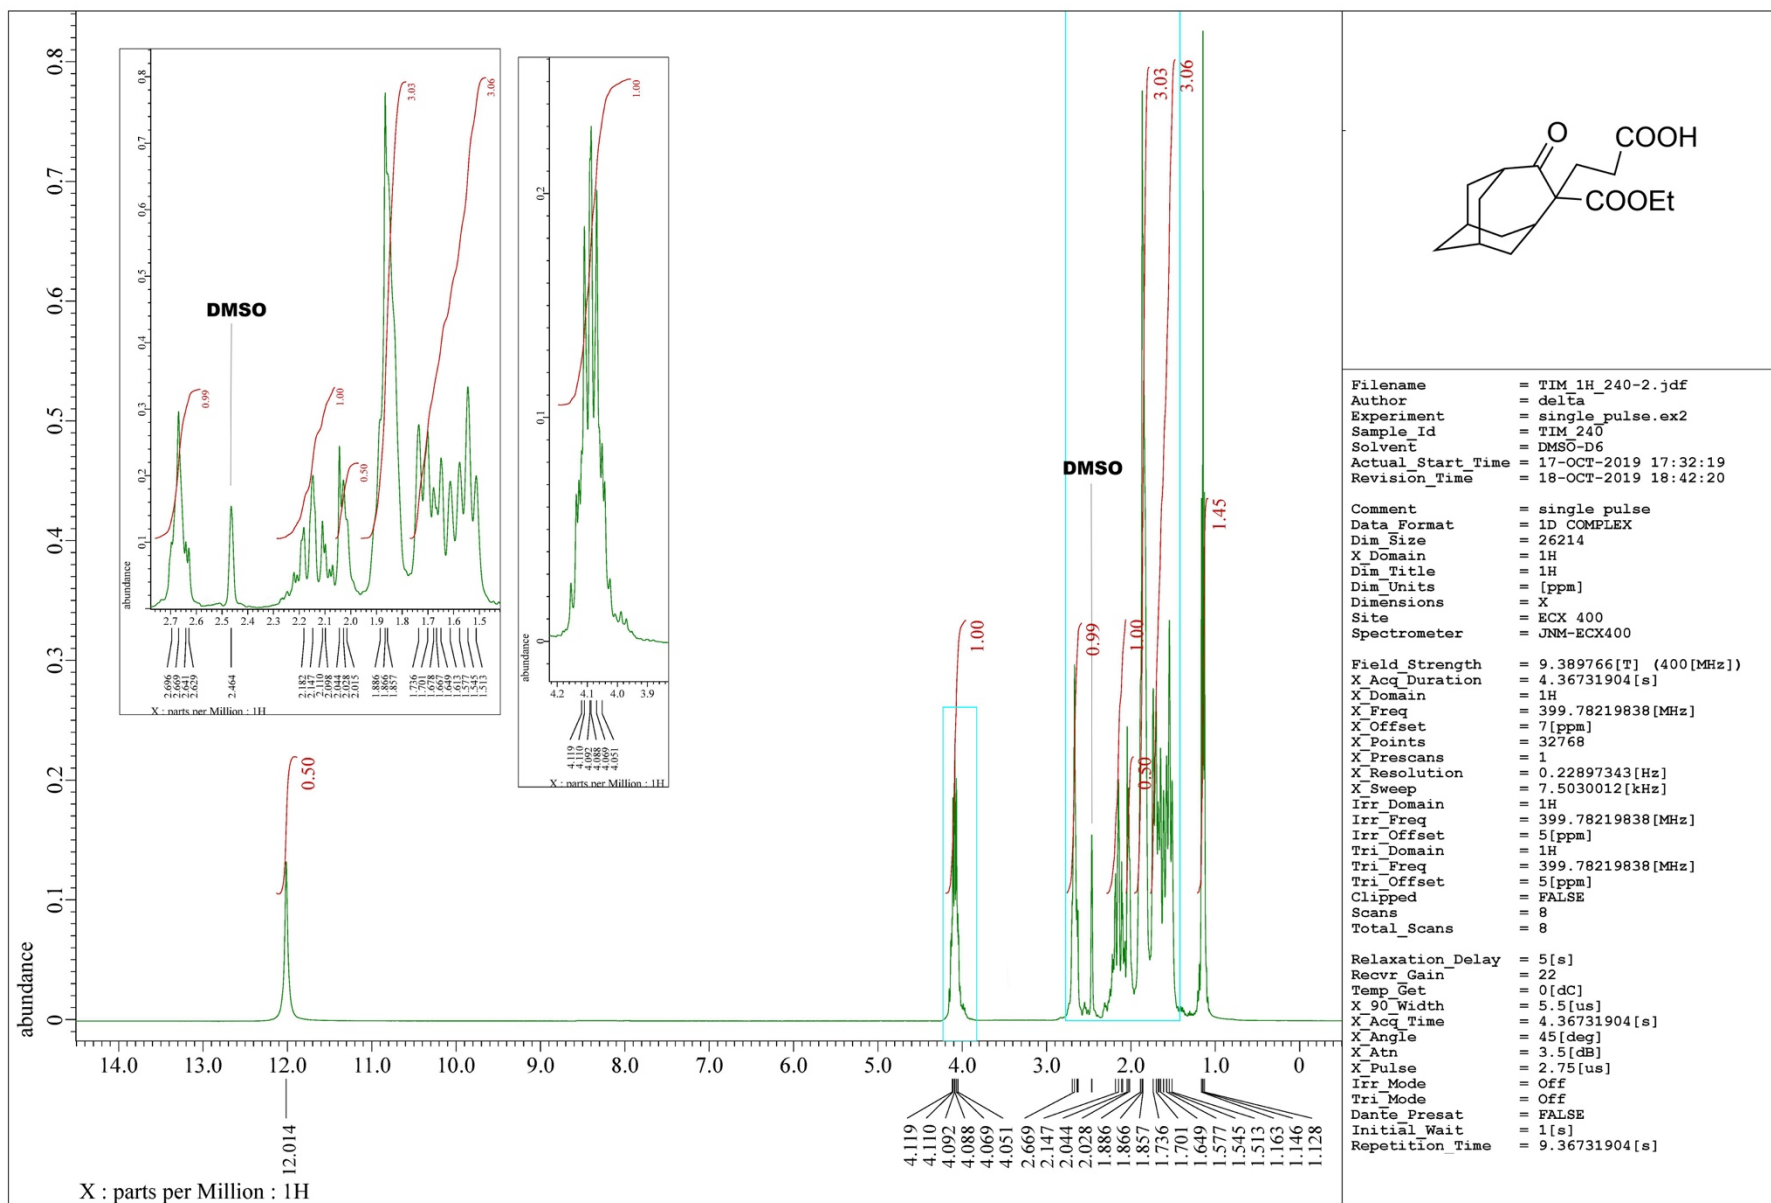



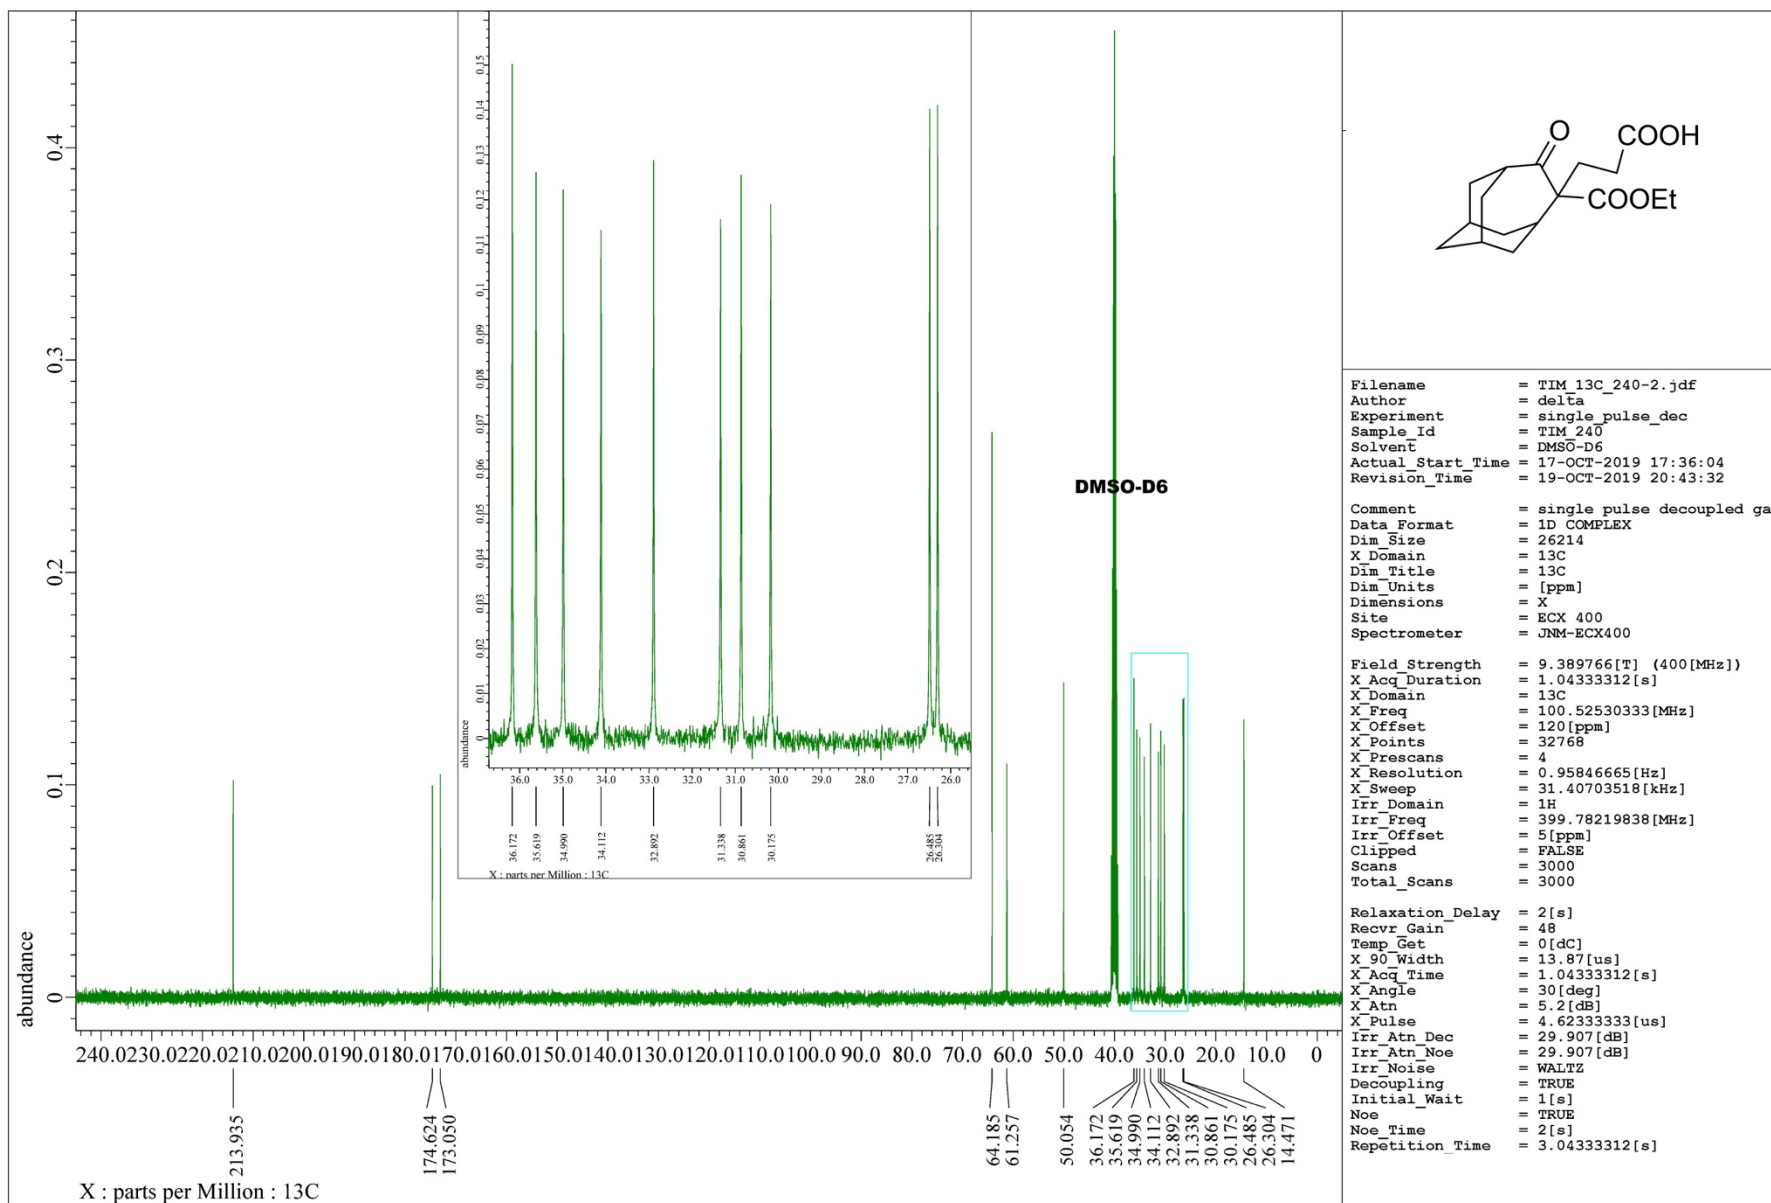

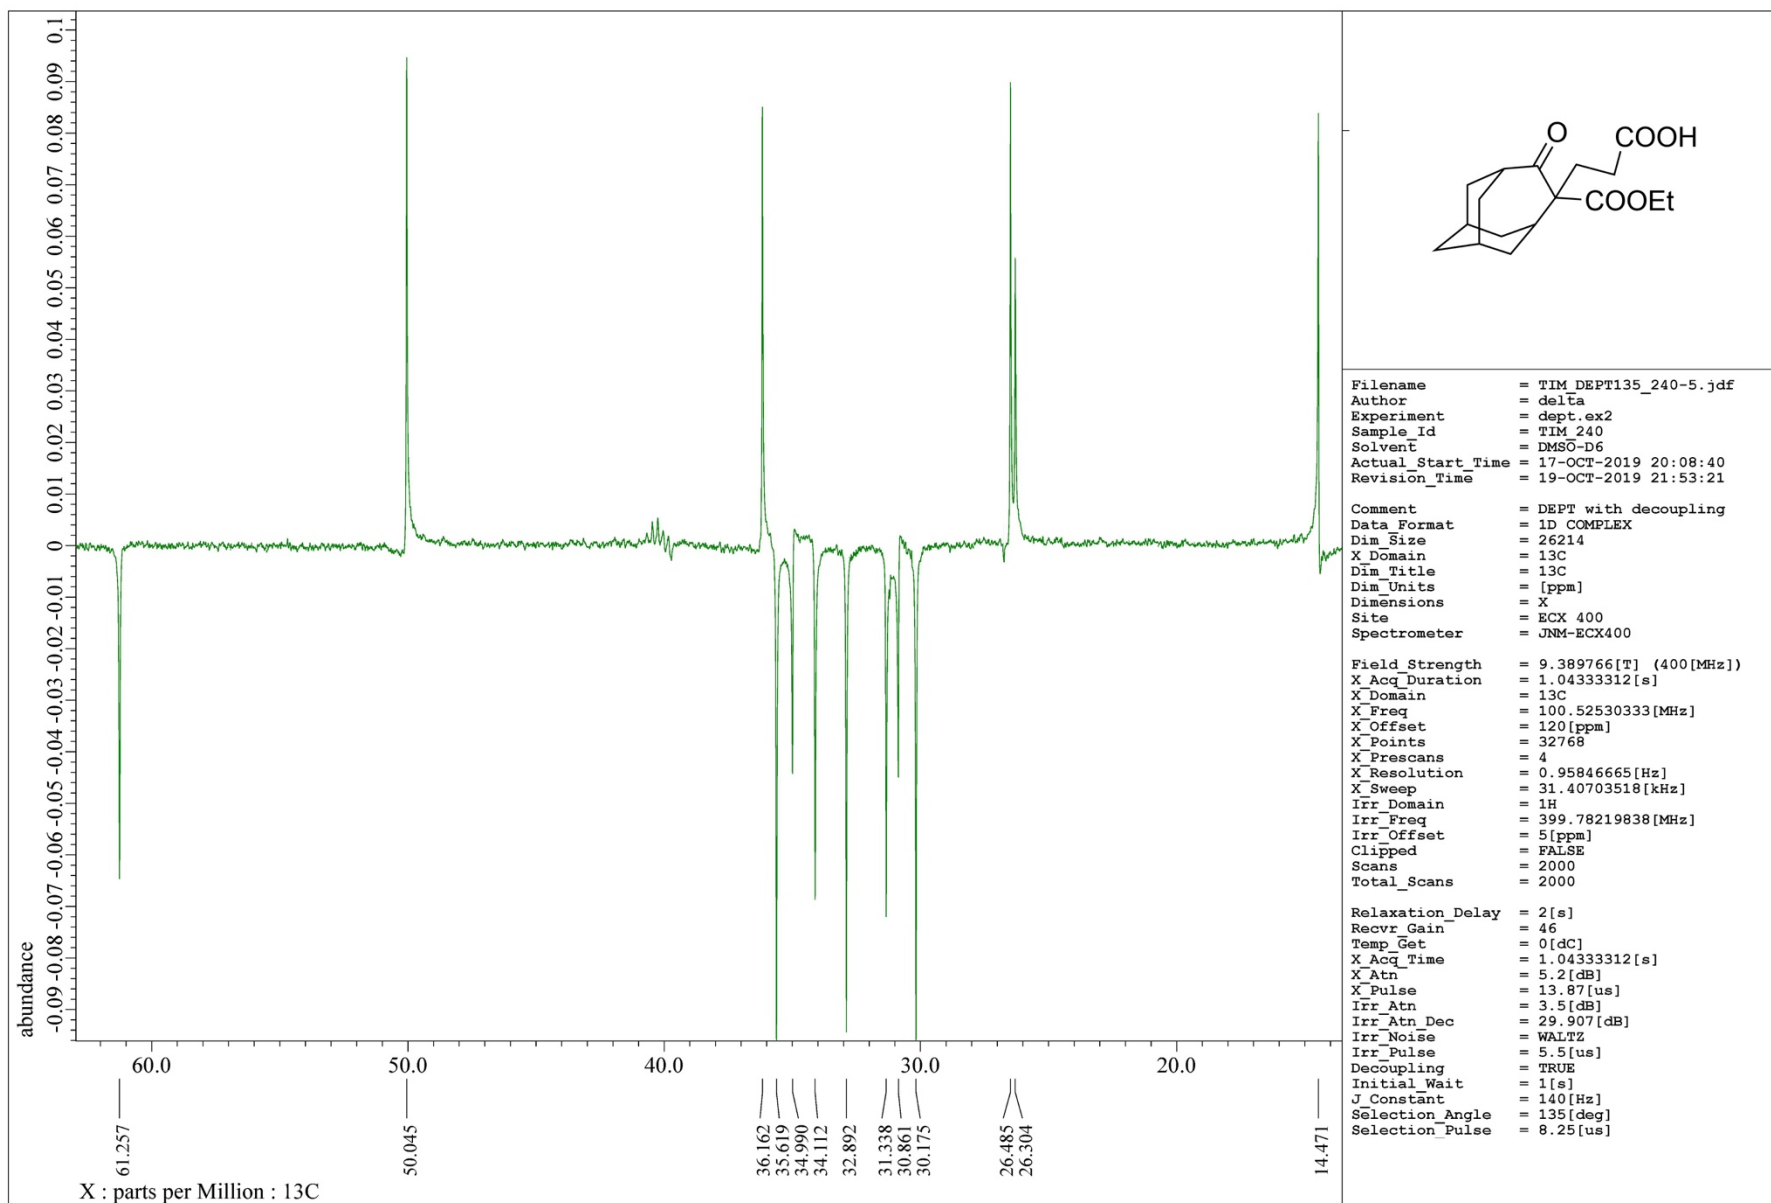



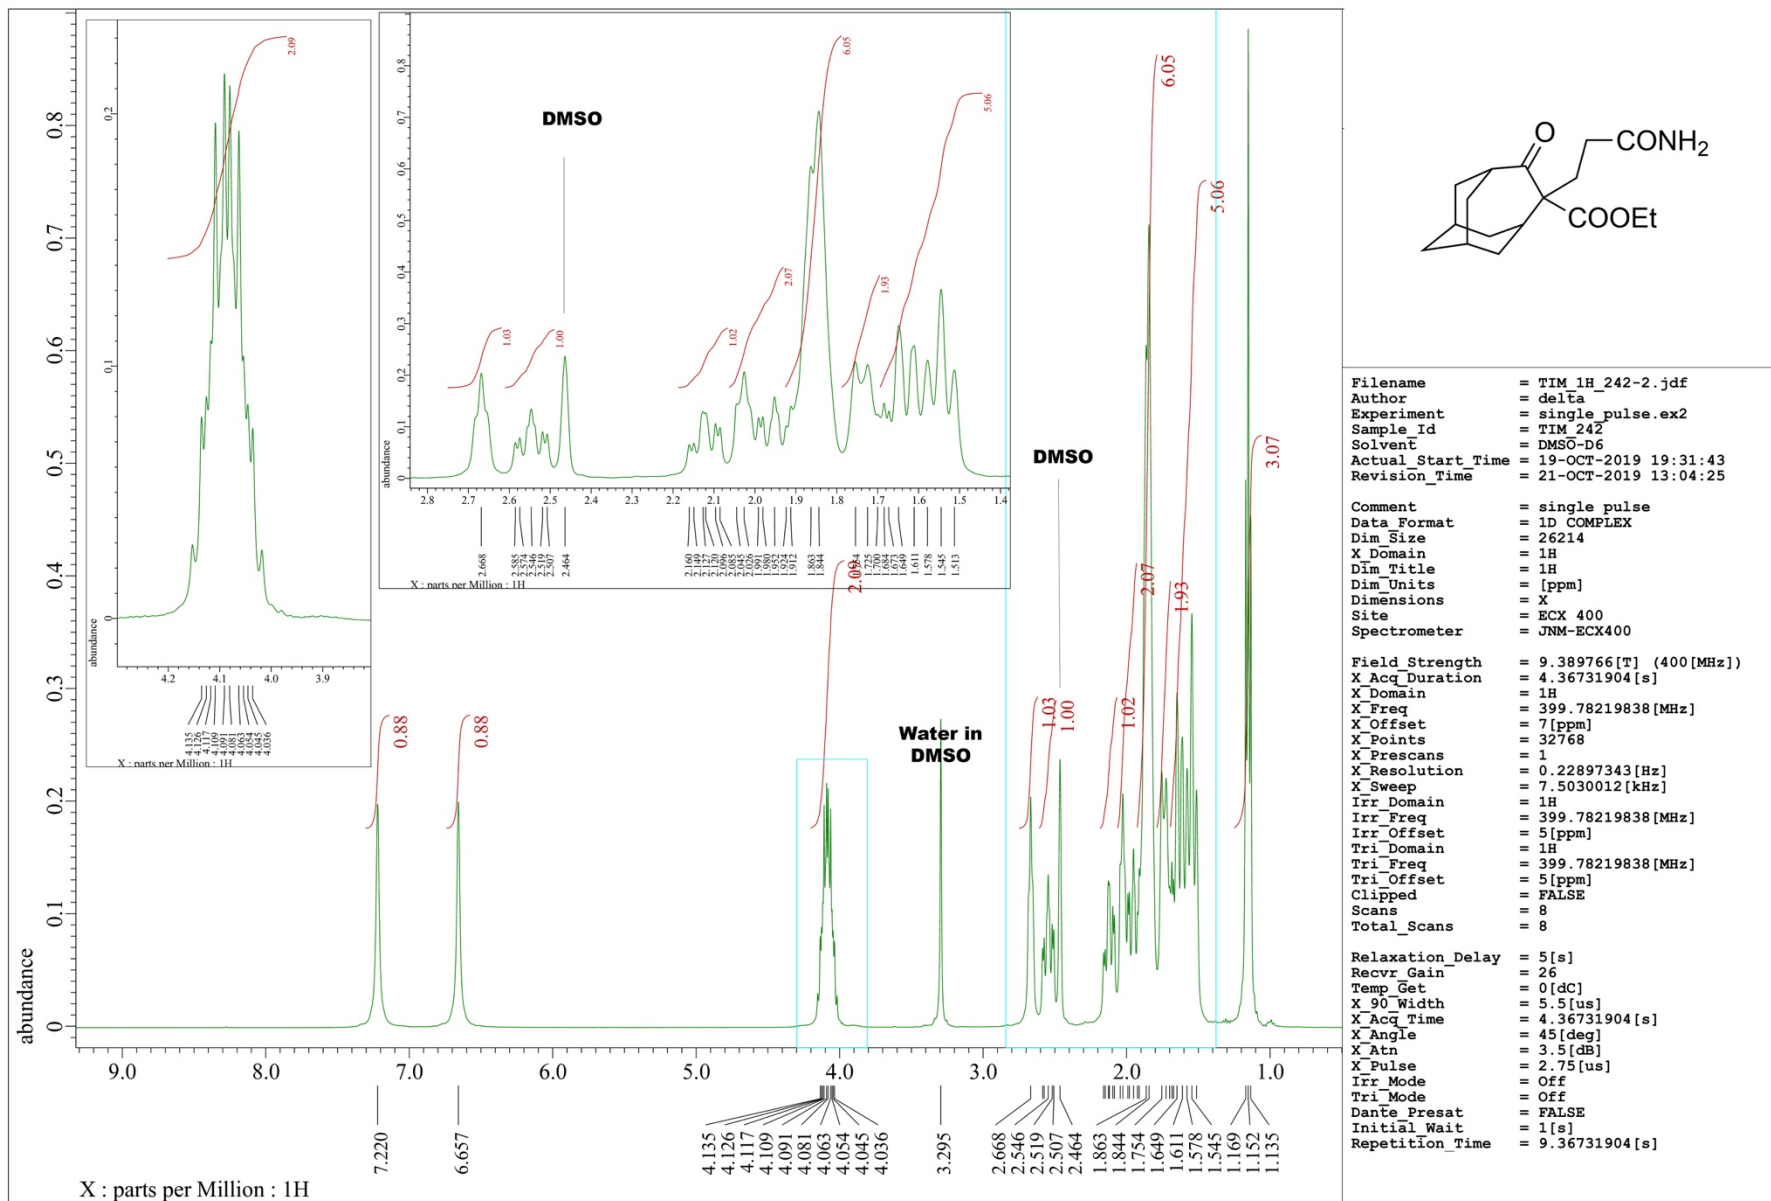

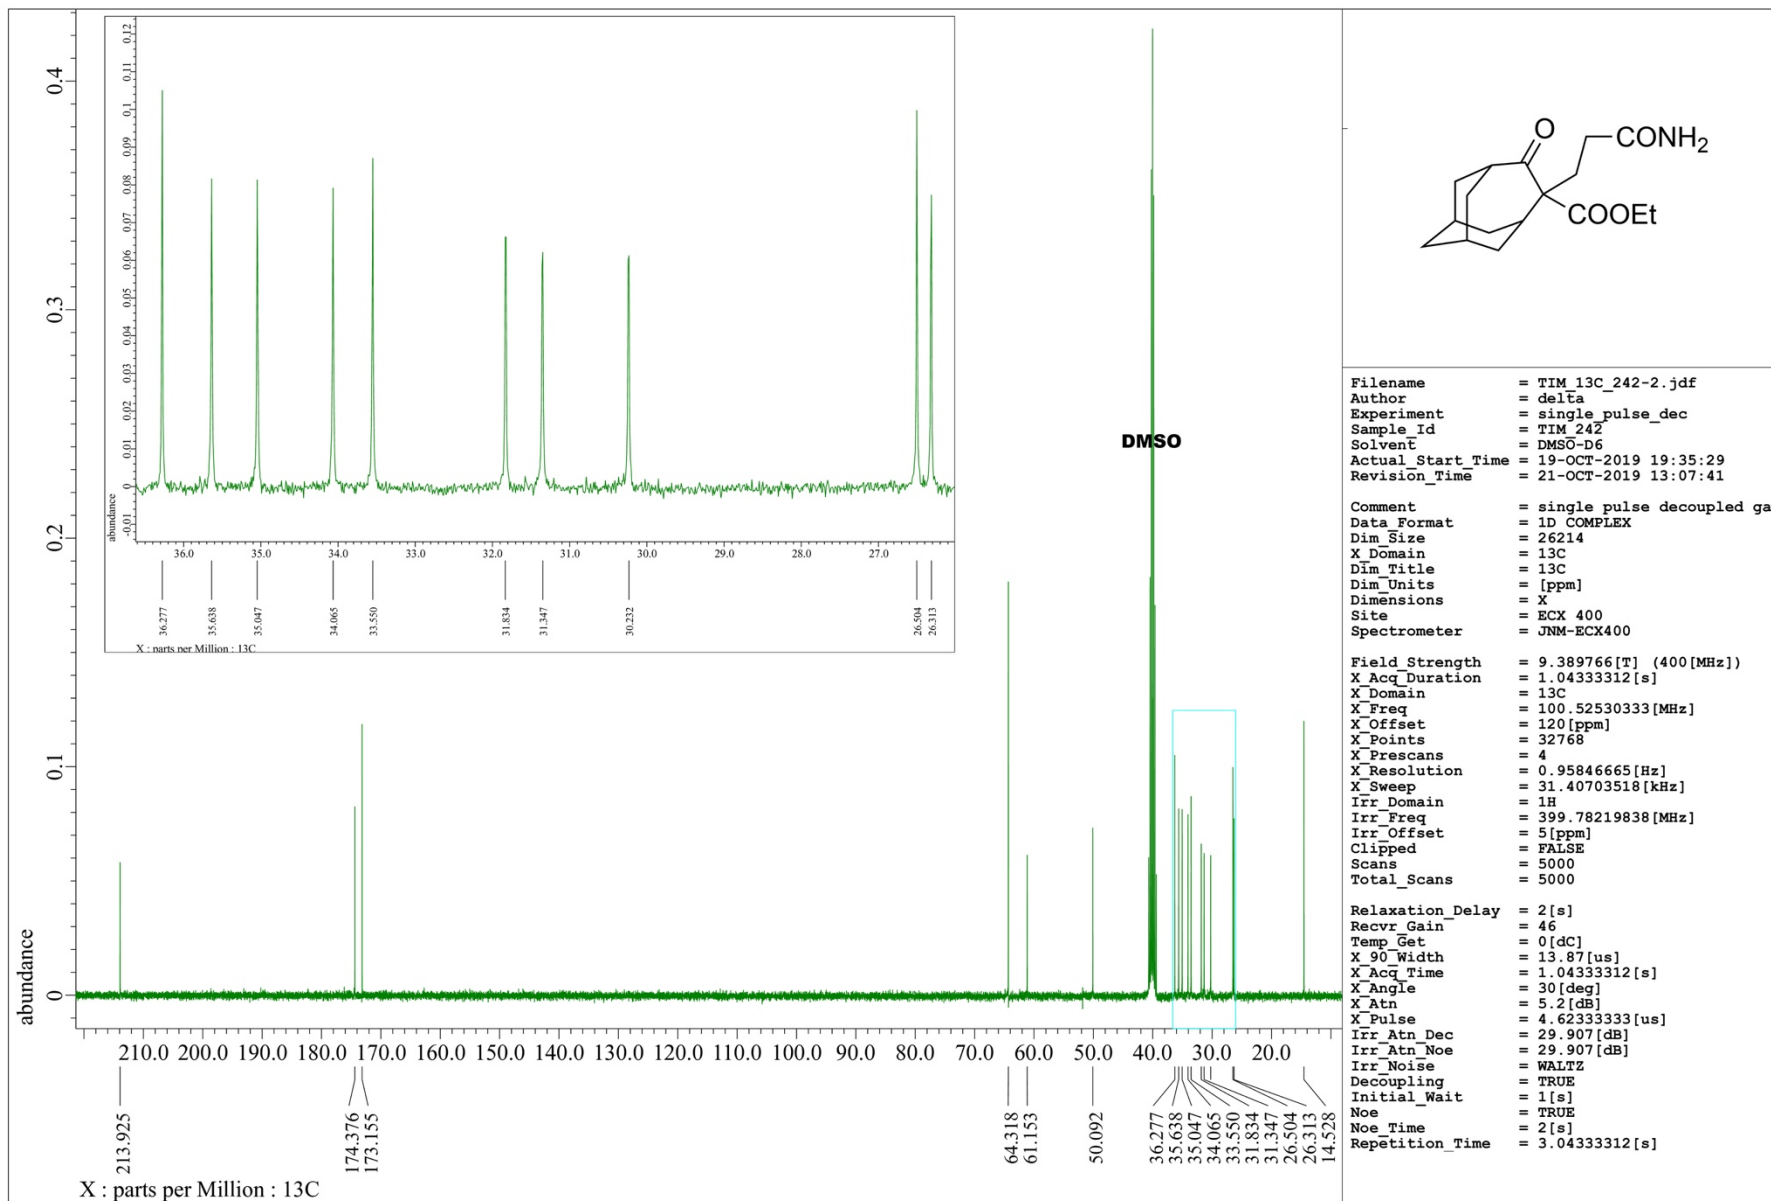



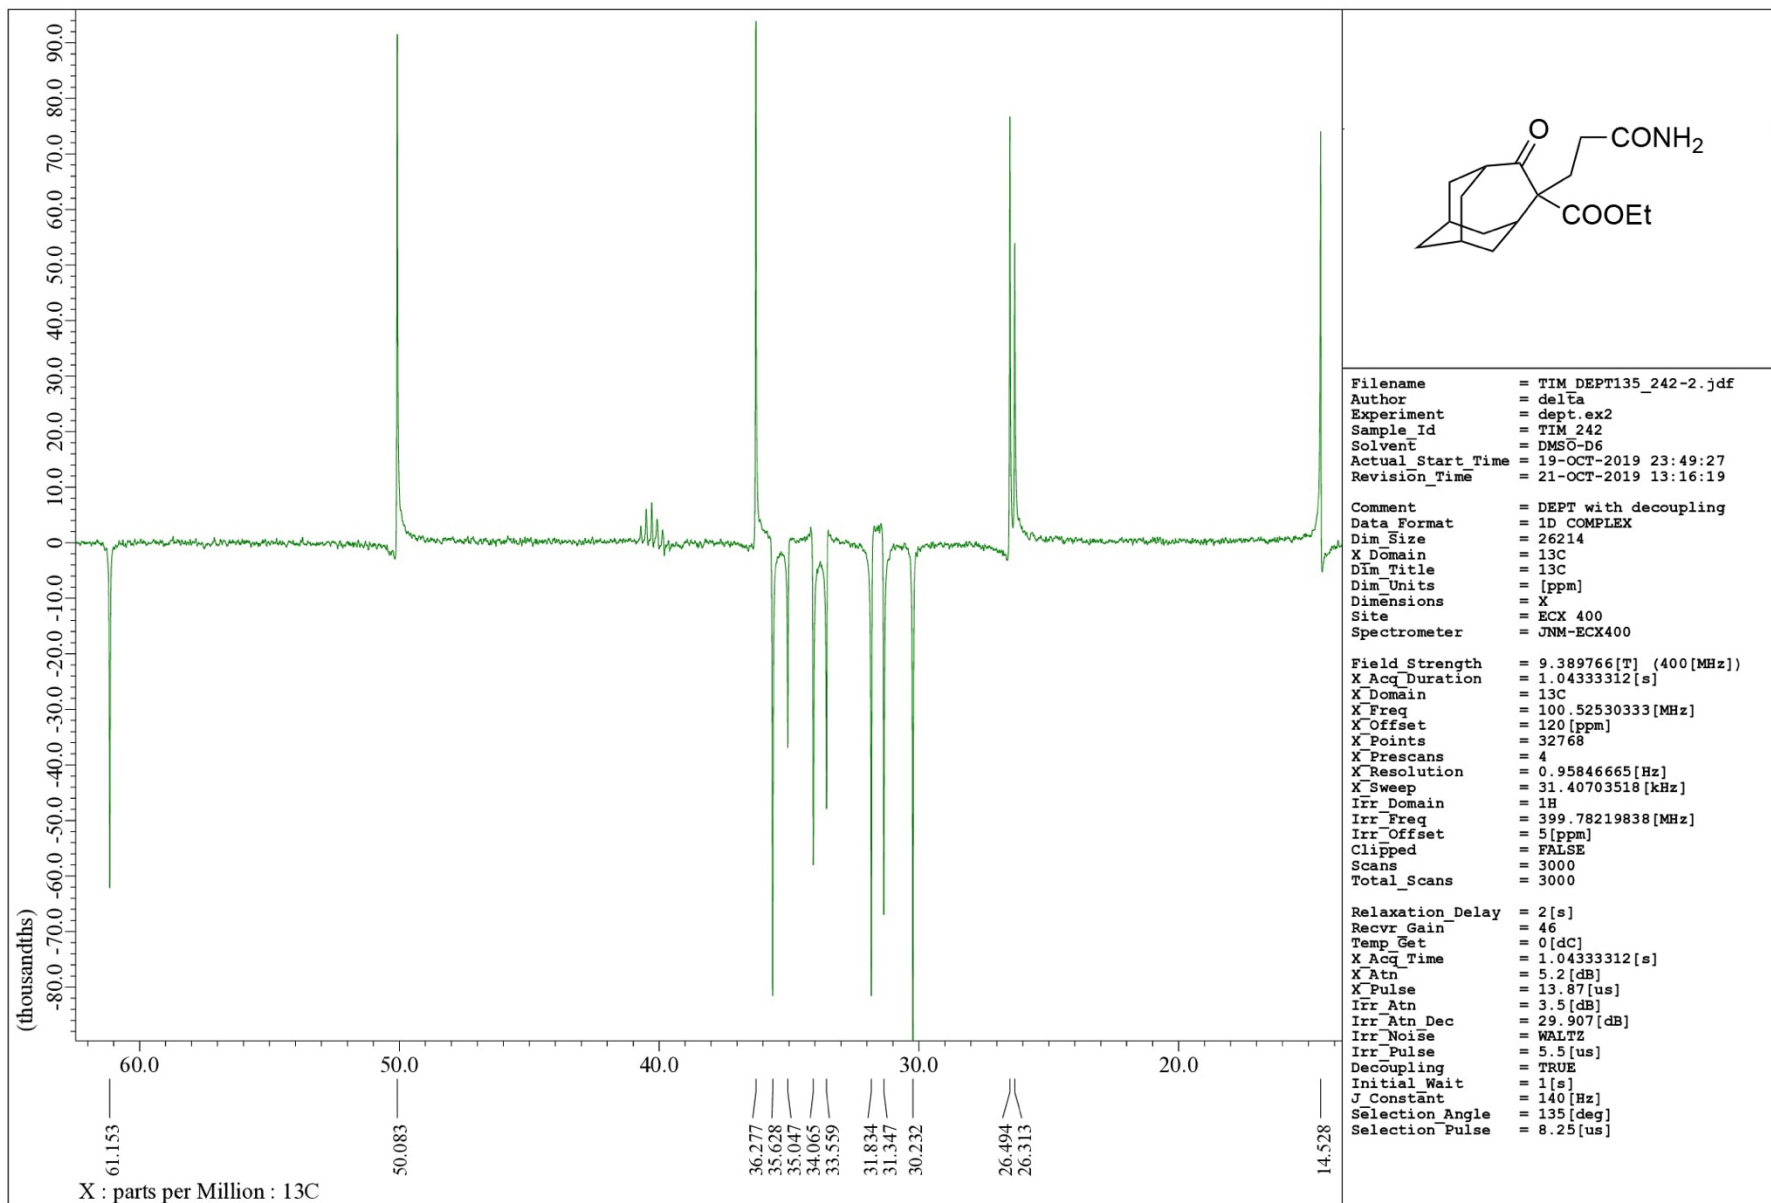

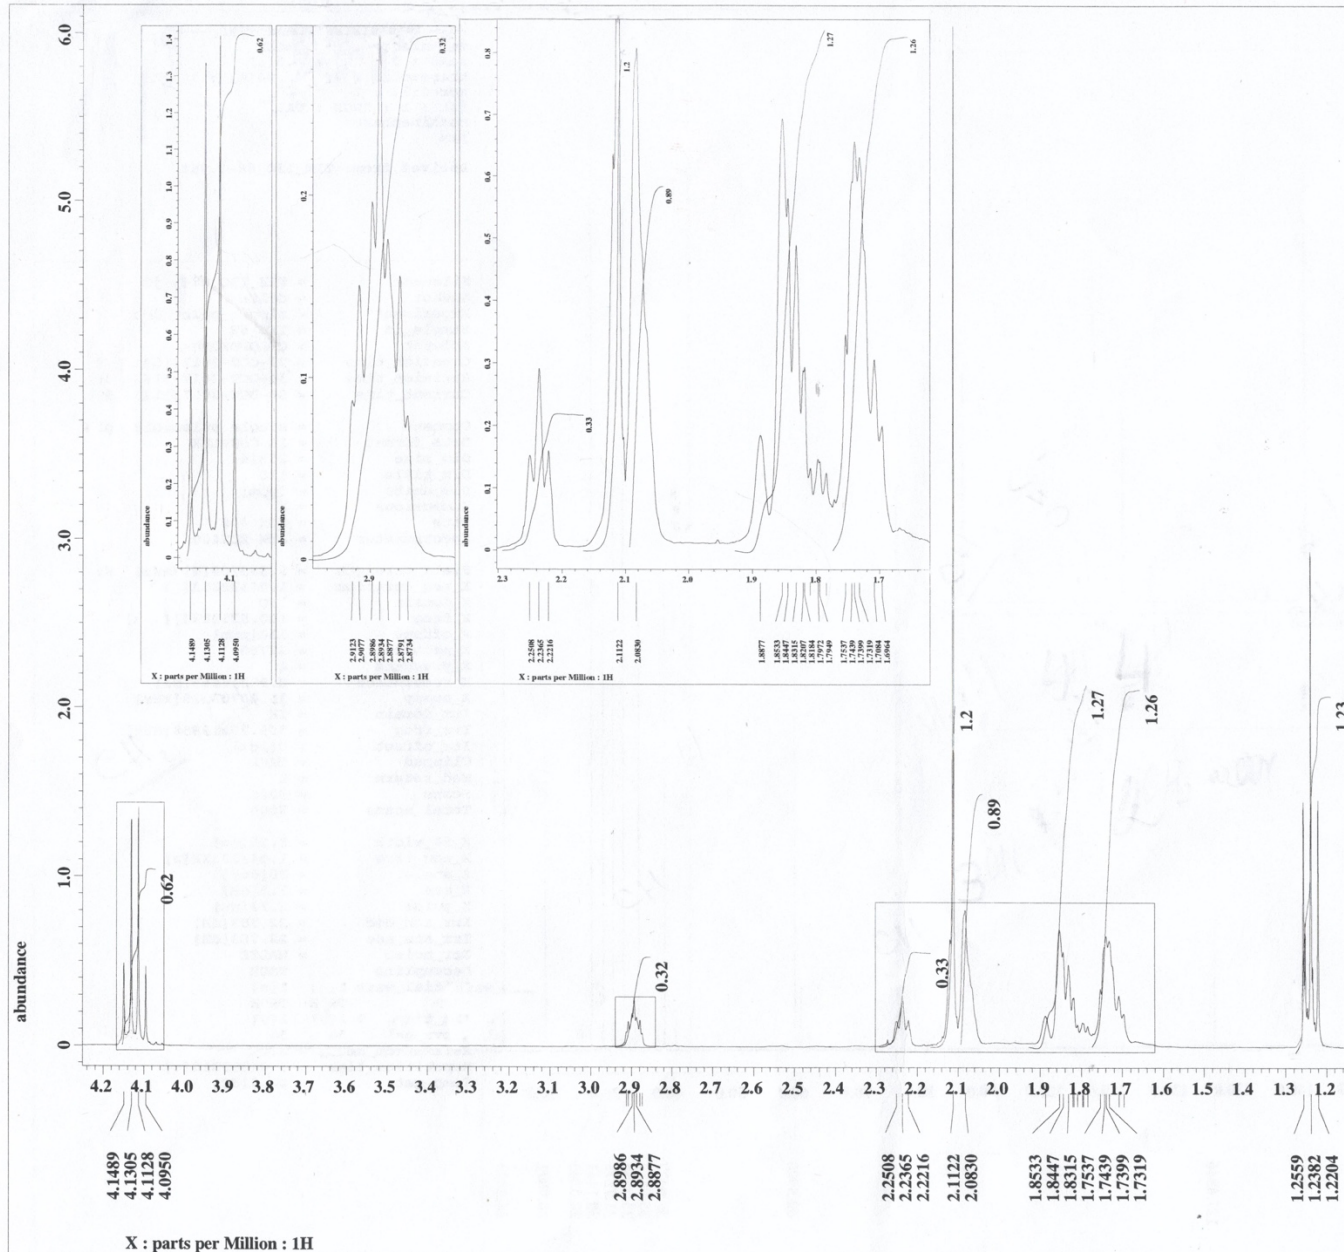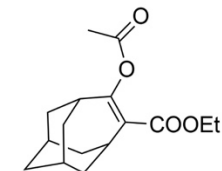

Filename = TIM\_1H\_68-4.jdf  
 Author = delta  
 Experiment = single\_pulse.ex2  
 Sample\_id = TIM\_68  
 Solvent = CHLOROFORM-D  
 Creation\_time = 29-OCT-2017 13:40:47  
 Revision\_time = 30-OCT-2017 11:38:30  
 Current\_time = 30-OCT-2017 11:39:17

Comment = single\_pulse  
 Data\_format = 1D COMPLEX  
 Dim\_size = 26214  
 Dim\_title = 1H  
 Dim\_units = [ppm]  
 Dimensions = X  
 Site = ECX 400  
 Spectrometer = JNM-ECX400

Field\_strength = 9.389766[T] (400[MHz])  
 X\_acq\_duration = 4.36731904[s]  
 X\_domain = 1H  
 X\_freq = 399.78219838[MHz]  
 X\_offset = 7[ppm]  
 X\_points = 32768  
 X\_prescans = 1  
 X\_resolution = 0.22897343[kHz]  
 X\_sweep = 7.5030012[kHz]  
 Irr\_domain = 1H  
 Irr\_freq = 399.78219838[MHz]  
 Irr\_offset = 5[ppm]  
 Tri\_domain = 1H  
 Tri\_freq = 399.78219838[MHz]  
 Tri\_offset = 5[ppm]  
 Clipped = FALSE  
 Mod\_return = 1  
 Scans = 8  
 Total\_scans = 8

X\_90\_width = 11.9[us]  
 X\_acq\_time = 4.36731904[s]  
 X\_angle = 45[deg]  
 X\_atn = 3[db]  
 X\_pulse = 5.95[us]  
 Irr\_mode = Off  
 Tri\_mode = Off  
 Dante\_preset = FALSE  
 Initial\_wait = 1[s]  
 Recvr\_gain = 28  
 Relaxation\_delay = 5[s]  
 Repetition\_time = 9.36731904[s]  
 Temp\_get = 22.7[dc]



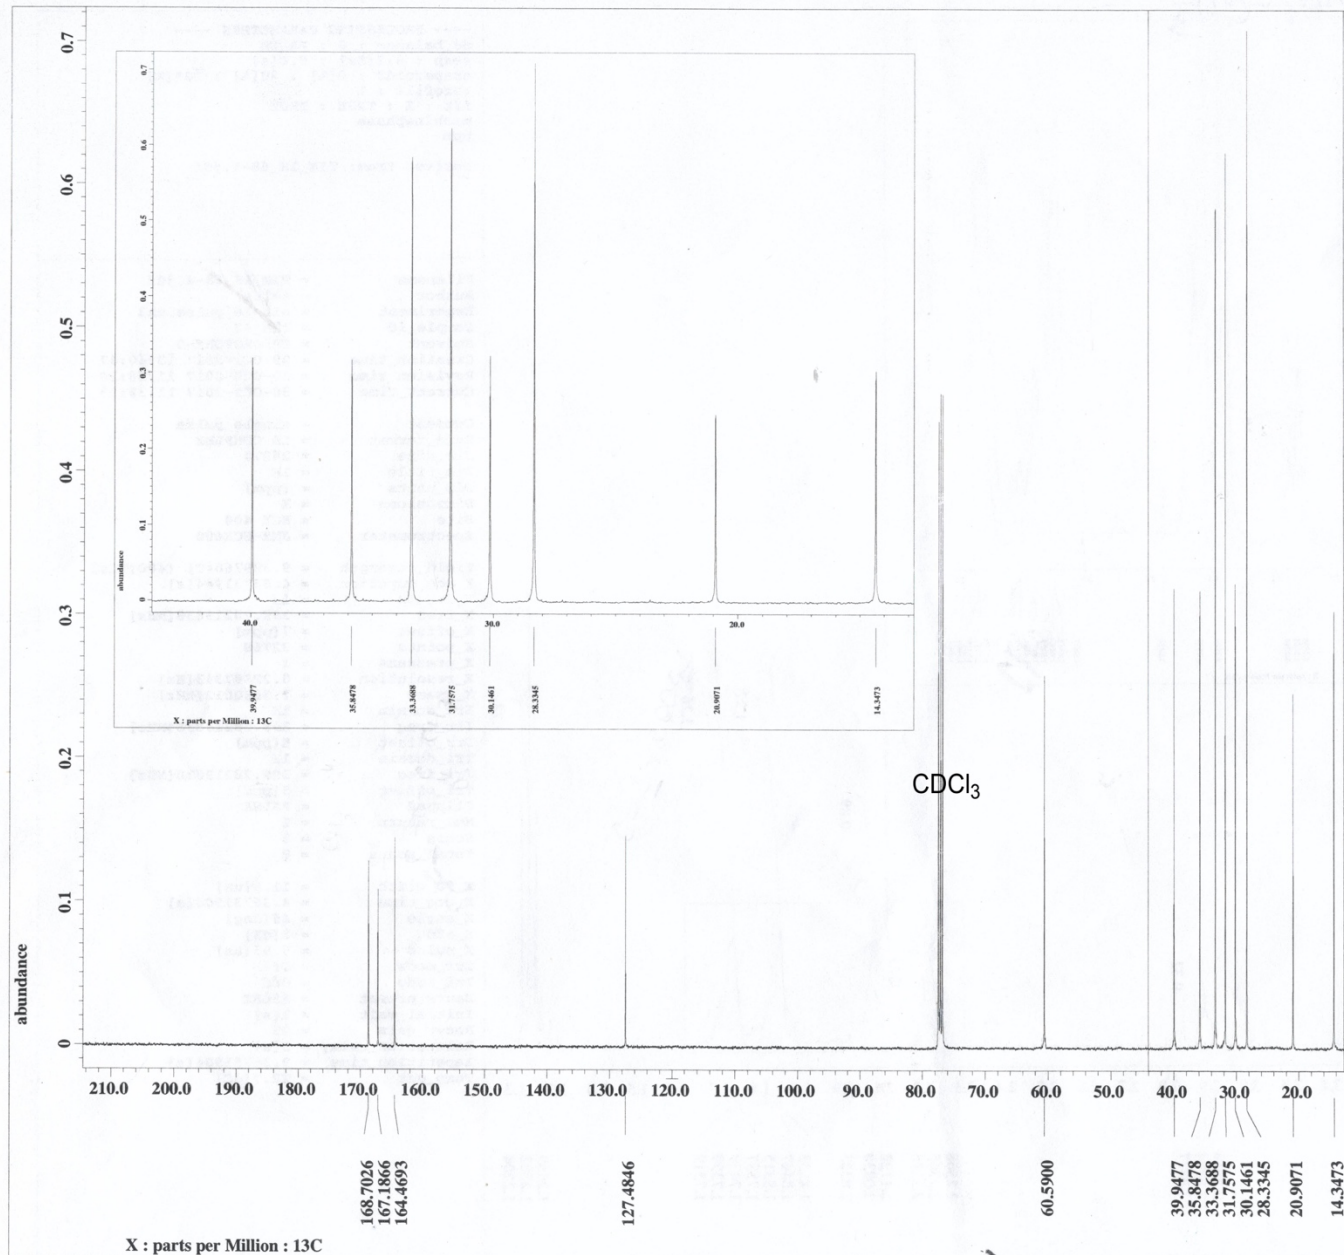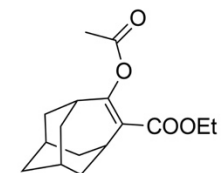

```

Filename      = TIM_13C_68-4.jdf
Author       = delta
Experiment    = single_pulse_dec
Sample_id     = TIM_68
Solvent       = CHLOROFORM-D
Creation_time = 29-OCT-2017 16:15:20
Revision_time = 30-OCT-2017 11:39:36
Current_time  = 30-OCT-2017 11:39:52

Comment      = single pulse decouple
Data_format  = 1D COMPLEX
Dim_size     = 26214
Dim_title    = 13C
Dim_units    = [ppm]
Dimensions   = X
Site         = ECX 400
Spectrometer = JNM-ECX400

Field_strength = 9.389766[T] (400[MHz])
X_acq_duration = 1.04333312[s]
X_domain       = 13C
X_freq         = 100.52530333 [MHz]
X_offset       = 120[ppm]
X_points       = 32768
X_prescans     = 4
X_resolution   = 0.95846665 [Hz]
X_sweep        = 31.40703518 [kHz]
Irr_domain     = 1H
Irr_freq       = 399.78219838 [MHz]
Irr_offset     = 5[ppm]
Clipped        = TRUE
Mod_return     = 1
Scans          = 3000
Total_scans    = 3000

X_90_width     = 8.16[us]
X_acq_time     = 1.04333312[s]
X_angle        = 30[deg]
X_atn          = 7.8[db]
X_pulse        = 2.72[us]
Irr_atn_dec    = 22.703[db]
Irr_atn_noe    = 22.703[db]
Irr_noise      = WALTZ
Decoupling     = TRUE
Initial_wait   = 1[s]
Noe            = TRUE
Noe_time       = 2[s]
Recvr_gain     = 50
Relaxation_delay = 2[s]
Repetition_time = 3.04333312[s]
Temp_get       = 23.3[dc]
  
```





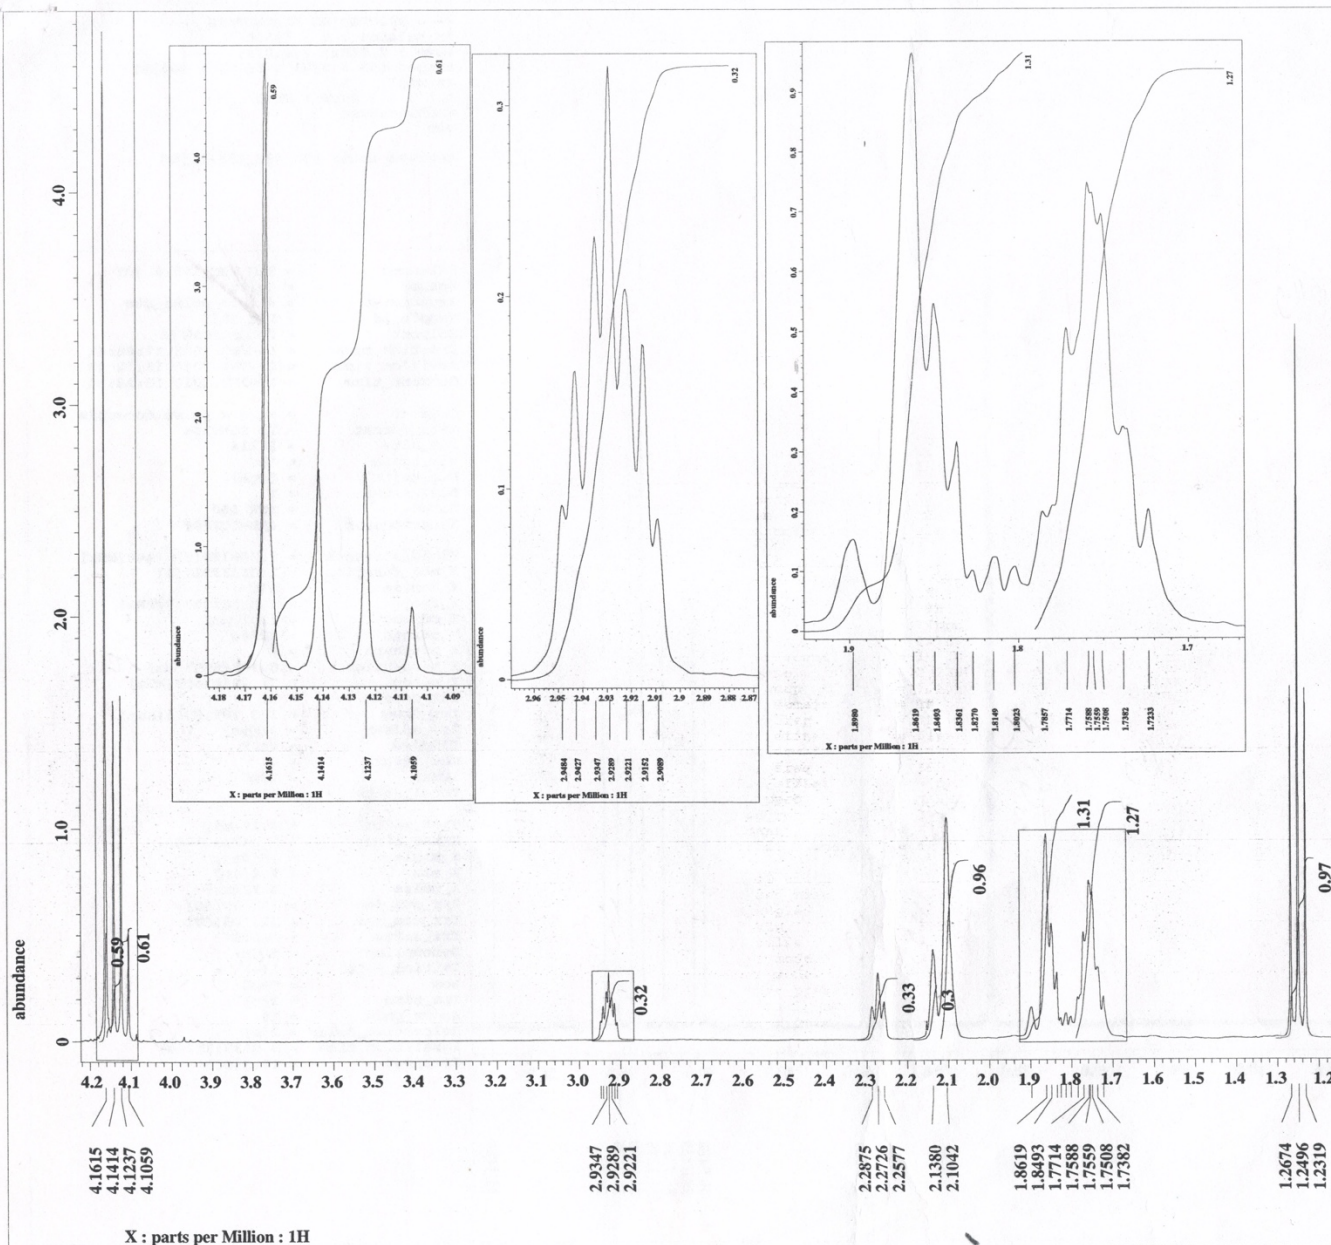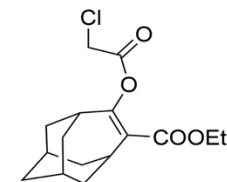

Filename = TIM\_1H\_105-4.jdf  
 Author = delta  
 Experiment = single\_pulse.ex2  
 Sample\_id = TIM\_105  
 Solvent = CHLOROFORM-D  
 Creation\_time = 14-FEB-2018 16:10:05  
 Revision\_time = 15-FEB-2018 13:11:58  
 Current\_time = 15-FEB-2018 13:12:35

Comment = single pulse  
 Data\_format = 1D COMPLEX  
 Dim\_size = 26214  
 Dim\_title = 1H  
 Dim\_units = [ppm]  
 Dimensions = X  
 Site = ECX 400  
 Spectrometer = JNM-ECX400

Field\_strength = 9.389766 [T] (400 [MHz])  
 X\_acq\_duration = 4.36731904 [s]  
 X\_domain = 1H  
 X\_freq = 399.78219838 [MHz]  
 X\_offset = 7 [ppm]  
 X\_points = 32768  
 X\_prescans = 1  
 X\_resolution = 0.22897343 [Hz]  
 X\_sweep = 7.5030012 [kHz]  
 Irr\_domain = 1H  
 Irr\_freq = 399.78219838 [MHz]  
 Irr\_offset = 5 [ppm]  
 Tri\_domain = 1H  
 Tri\_freq = 399.78219838 [MHz]  
 Tri\_offset = 5 [ppm]  
 Clipped = FALSE  
 Mod\_return = 1  
 Scans = 8  
 Total\_scans = 8

X\_90\_width = 11.9 [us]  
 X\_acq\_time = 4.36731904 [s]  
 X\_angle = 45 [deg]  
 X\_atn = 3 [dB]  
 X\_pulse = 5.95 [us]  
 Irr\_mode = Off  
 Tri\_mode = Off  
 Dante\_presat = FALSE  
 Initial\_wait = 1 [s]  
 Recvr\_gain = 32  
 Relaxation\_delay = 5 [s]  
 Repetition\_time = 9.36731904 [s]  
 Temp\_get = 18.7 [dC]



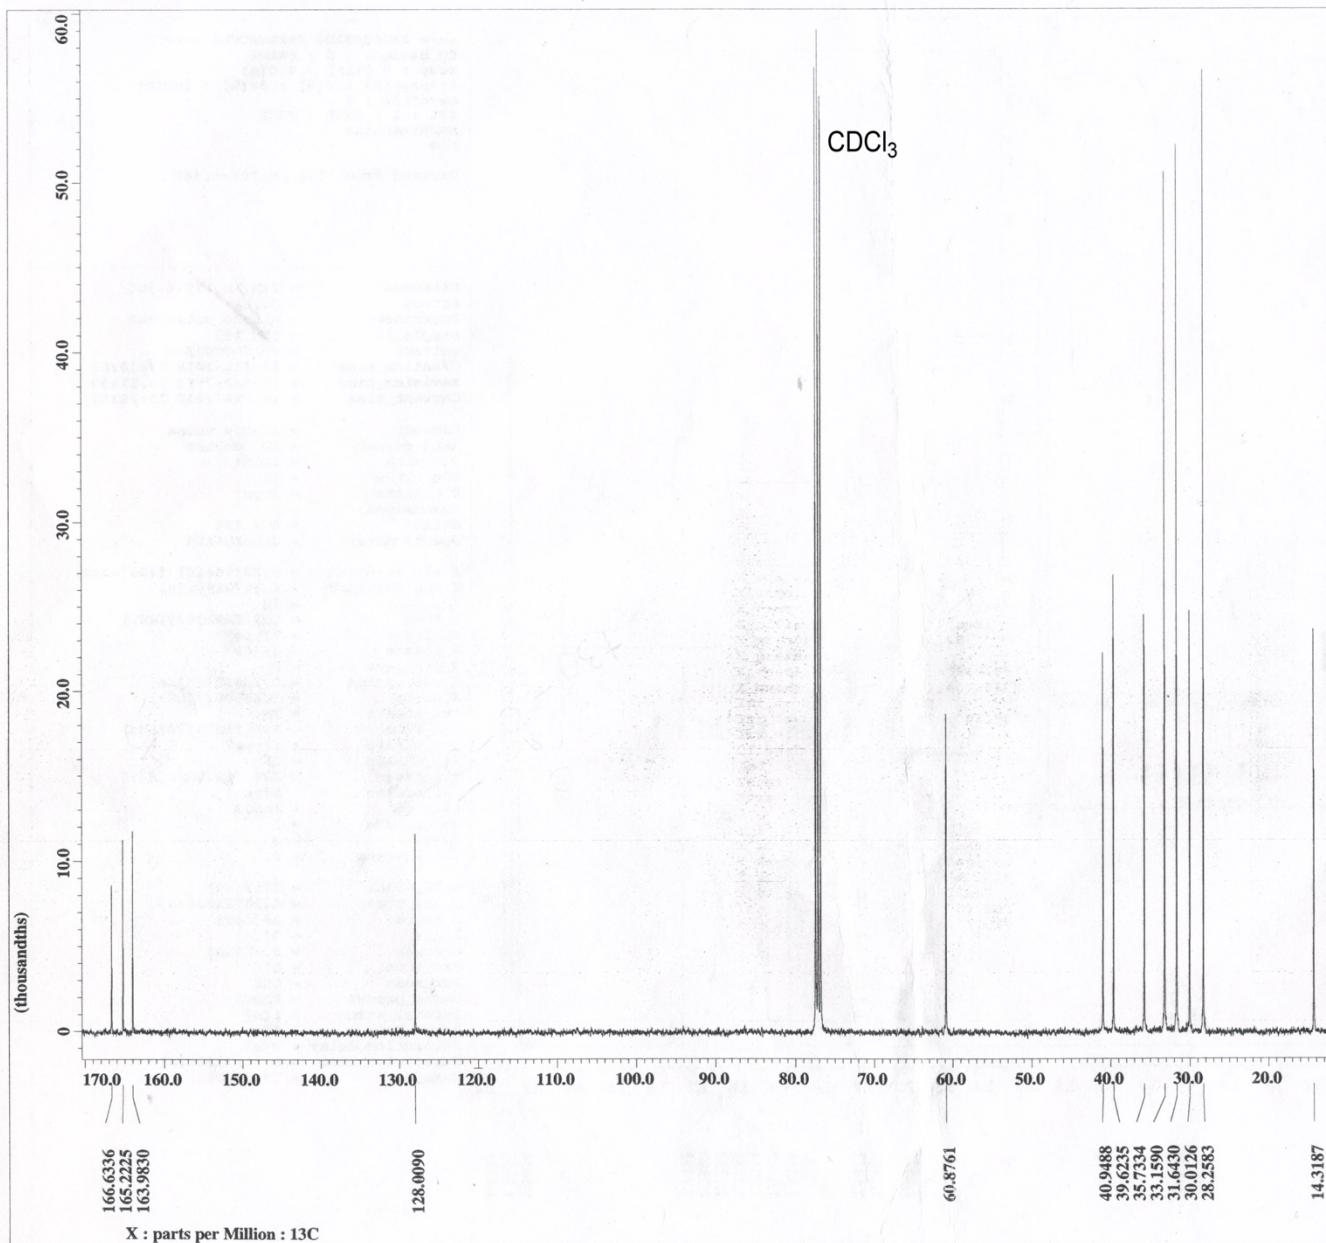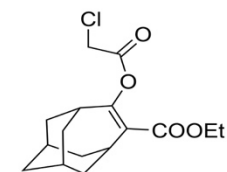

Filename = TIM\_13C\_105-4.jdf  
 Author = delta  
 Experiment = single\_pulse\_dec  
 Sample\_id = TIM\_105  
 Solvent = CHLOROFORM-D  
 Creation\_time = 14-FEB-2018 17:04:41  
 Revision\_time = 15-FEB-2018 13:12:48  
 Current\_time = 15-FEB-2018 13:12:54  
 Comment = single pulse decouple  
 Data\_format = 1D COMPLEX  
 Dim\_size = 26214  
 Dim\_title = 13C  
 Dim\_units = [ppm]  
 Dimensions = X  
 Site = ECX 400  
 Spectrometer = JNM-ECX400  
 Field\_strength = 9.389766[T] (400[MHz])  
 X\_acq\_duration = 1.04333312[s]  
 X\_domain = 13C  
 X\_freq = 100.52530333[MHz]  
 X\_offset = 120[ppm]  
 X\_points = 32768  
 X\_prescans = 4  
 X\_resolution = 0.95846665[Hz]  
 X\_sweep = 31.40703518[kHz]  
 Irr\_domain = 1H  
 Irr\_freq = 399.78219838[MHz]  
 Irr\_offset = 5[ppm]  
 Clipped = TRUE  
 Mod\_return = 1  
 Scans = 1000  
 Total\_scans = 1000  
 X\_90\_width = 8.16[us]  
 X\_acq\_time = 1.04333312[s]  
 X\_angle = 30[deg]  
 X\_atn = 7.8[dB]  
 X\_pulse = 2.72[us]  
 Irr\_atn\_dec = 22.703[dB]  
 Irr\_atn\_noe = 22.703[dB]  
 Irr\_noise = WALTZ  
 Decoupling = TRUE  
 Initial\_wait = 1[s]  
 Noe = TRUE  
 Noe\_time = 2[s]  
 Recvr\_gain = 30  
 Relaxation\_delay = 2[s]  
 Repetition\_time = 3.04333312[s]  
 Temp\_get = 19.2[dc]



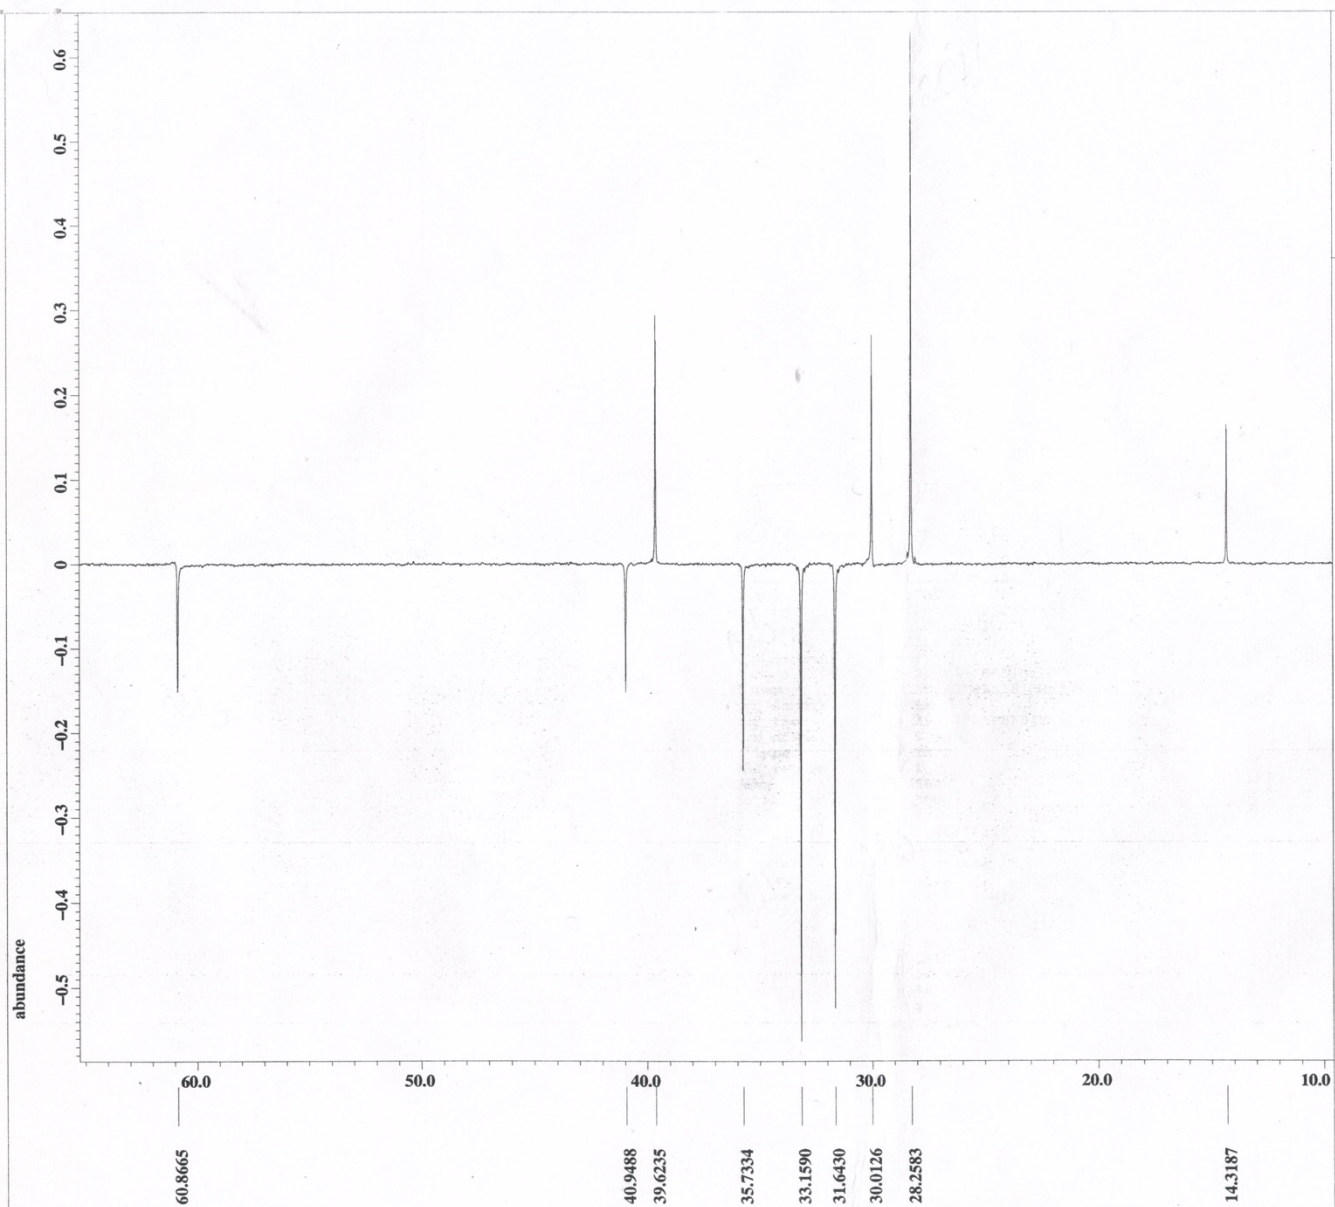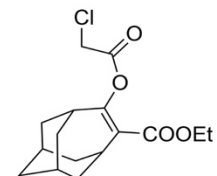

Filename = TIM\_DEPT135\_105-3.jdf  
 Author = delta  
 Experiment = dept.ex2  
 Sample\_id = TIM\_105  
 Solvent = CHLOROFORM-D  
 Creation\_time = 14-FEB-2018 17:30:29  
 Revision\_time = 15-FEB-2018 13:13:00  
 Current\_time = 15-FEB-2018 13:13:03

Comment = DEPT with decoupling  
 Data\_format = 1D COMPLEX  
 Dim\_size = 26214  
 Dim\_title = 13C  
 Dim\_units = [ppm]  
 Dimensions = X  
 Site = ECX 400  
 Spectrometer = JNM-ECX400

Field\_strength = 9.389766[T] (400[MHz])  
 X\_acq\_duration = 1.04333312[s]  
 X\_domain = 13C  
 X\_freq = 100.52530333[MHz]  
 X\_offset = 120[ppm]  
 X\_points = 32768  
 X\_prescans = 4  
 X\_resolution = 0.95846665[Hz]  
 X\_sweep = 31.40703518[kHz]  
 Irr\_domain = 1H  
 Irr\_freq = 399.78219838[MHz]  
 Irr\_offset = 5[ppm]  
 Clipped = TRUE  
 Mod\_return = 1  
 Scans = 500  
 Total\_scans = 500  
 X\_acq\_time = 1.04333312[s]  
 X\_atn = 7.8[dB]  
 X\_pulse = 8.16[us]  
 Irr\_atn = 3[dB]  
 Irr\_atn\_dec = 22.703[dB]  
 Irr\_noise = WALTZ  
 Irr\_pulse = 11.9[us]  
 Decoupling = TRUE  
 Initial\_wait = 1[s]  
 J\_constant = 140[Hz]  
 Recvr\_gain = 46  
 Relaxation\_delay = 2[s]  
 Selection\_angle = 135[deg]  
 Selection\_pulse = 17.85[us]  
 Temp\_get = 19.3[degC]



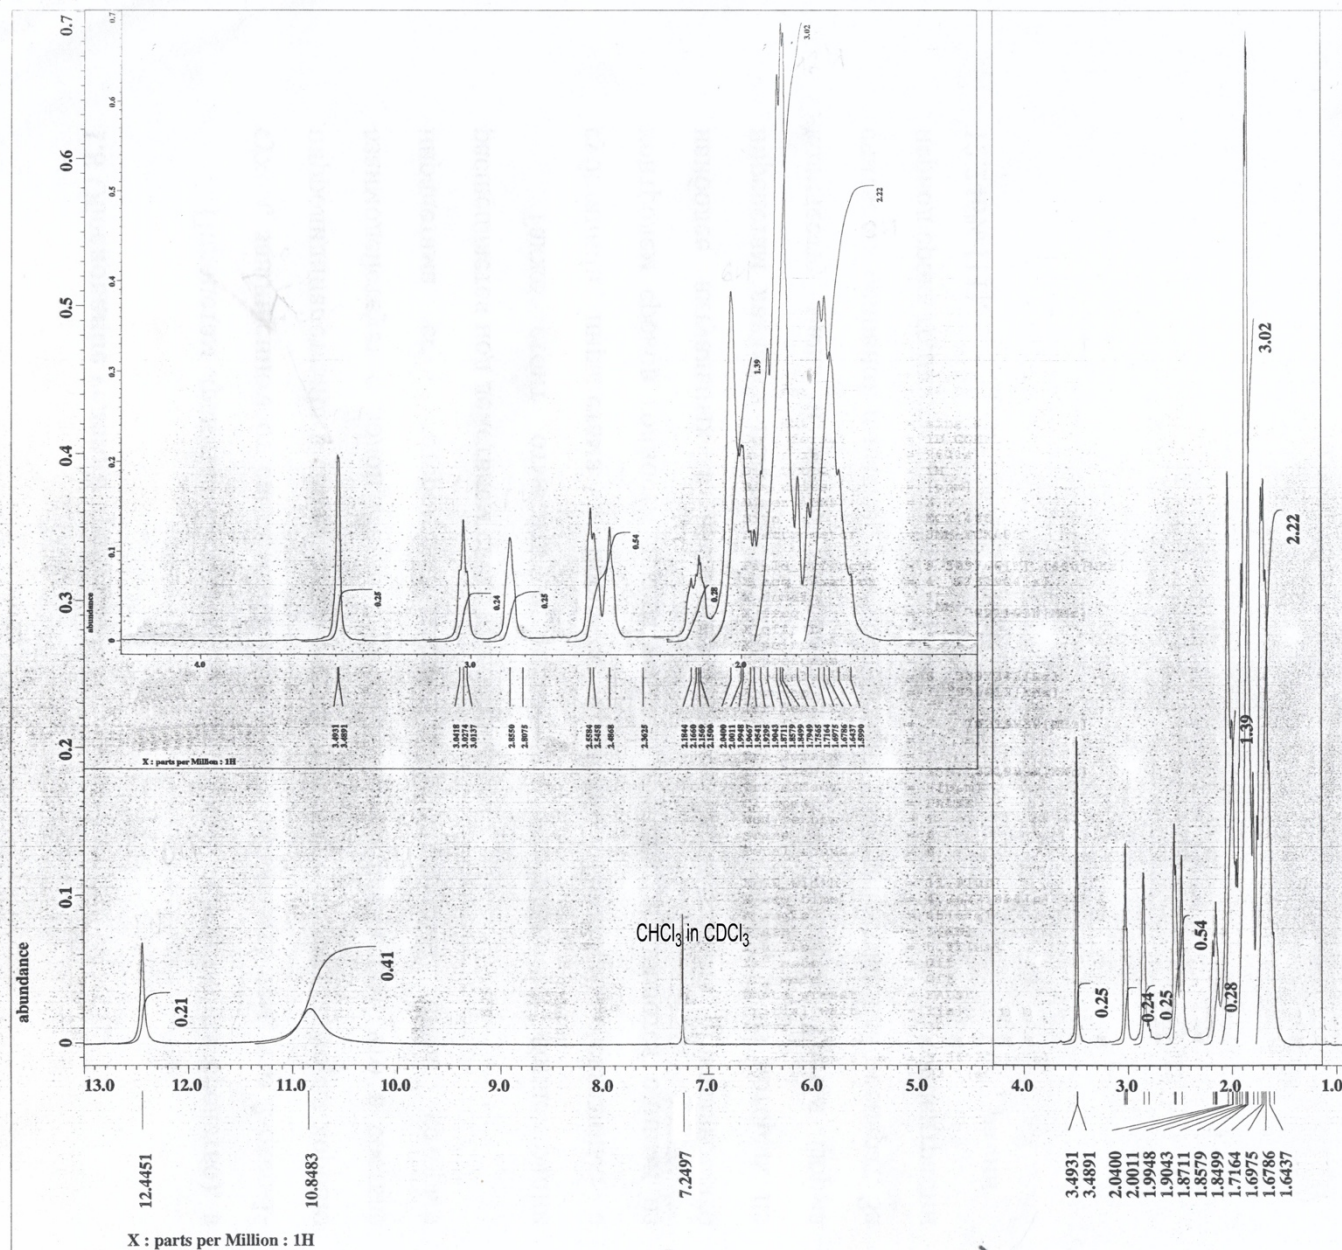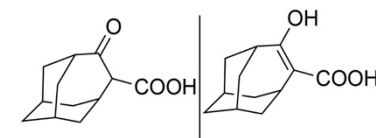

Filename = TIM\_1H\_173-4.jdf  
 Author = delta  
 Experiment = single\_pulse.ex2  
 Sample\_id = TIM\_173  
 Solvent = CHLOROFORM-D  
 Creation\_time = 21-DEC-2018 16:38:28  
 Revision\_time = 24-DEC-2018 10:23:55  
 Current\_time = 24-DEC-2018 10:24:16

Comment = single\_pulse  
 Data\_format = 1D COMPLEX  
 Dim\_size = 26214  
 Dim\_title = 1H  
 Dim\_units = [ppm]  
 Dimensions = X  
 Site = ECX 400  
 Spectrometer = JNM-ECX400

Field\_strength = 9.389766[T] (400[MHz])  
 X\_acq\_duration = 4.36731904[s]  
 X\_domain = 1H  
 X\_freq = 399.78219838[MHz]  
 X\_offset = 7[ppm]  
 X\_points = 32768  
 X\_prescans = 1  
 X\_resolution = 0.22897343[Hz]  
 X\_sweep = 7.5030012[kHz]  
 Irr\_domain = 1H  
 Irr\_freq = 399.78219838[MHz]  
 Irr\_offset = 5[ppm]  
 Tri\_domain = 1H  
 Tri\_freq = 399.78219838[MHz]  
 Tri\_offset = 5[ppm]  
 Clipped = FALSE  
 Mod\_return = 1  
 Scans = 8  
 Total\_scans = 8

X\_90\_width = 11.9[us]  
 X\_acq\_time = 4.36731904[s]  
 X\_angle = 45[deg]  
 X\_atn = 3[dB]  
 X\_pulse = 5.95[us]  
 Irr\_mode = Off  
 Tri\_mode = Off  
 Dante\_presat = FALSE  
 Initial\_wait = 1[s]  
 Recvr\_gain = 30  
 Relaxation\_delay = 5[s]  
 Repetition\_time = 9.36731904[s]  
 Temp\_get = 22.1[dc]



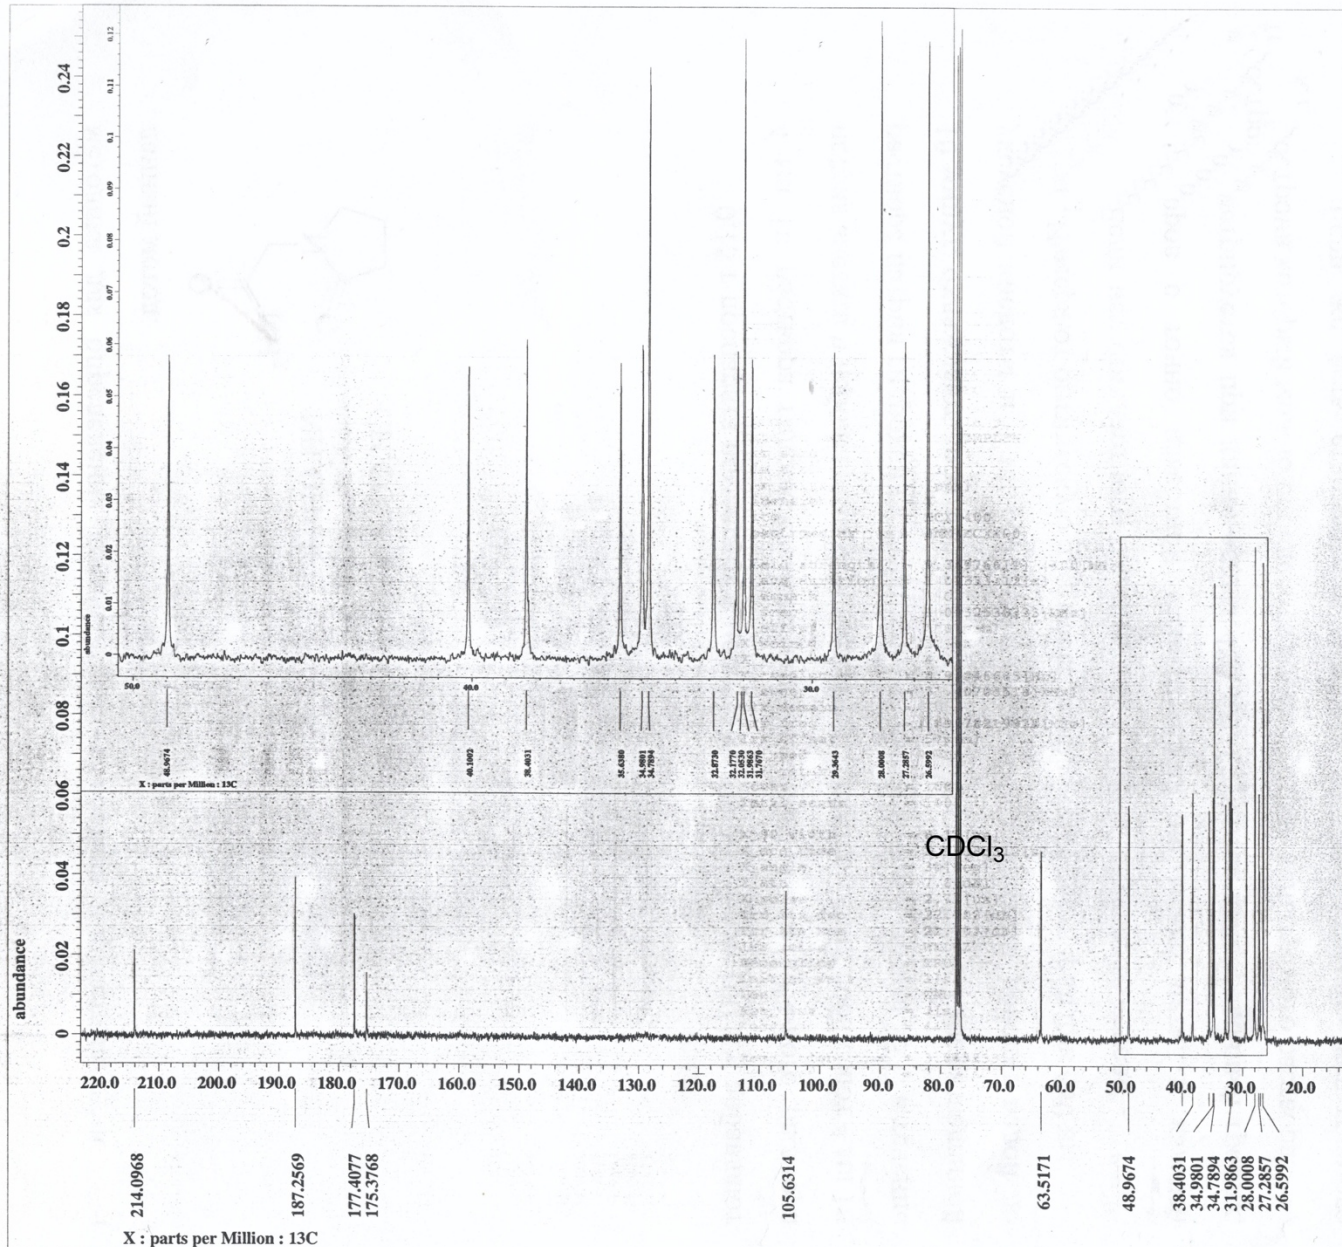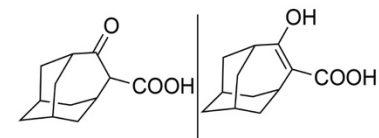

Filename = TIM\_13C\_173-3.jdf  
 Author = delta  
 Experiment = single\_pulse\_dec  
 Sample\_id = TIM\_173  
 Solvent = CHLOROFORM-D  
 Creation\_time = 21-DEC-2018 17:32:03  
 Revision\_time = 24-DEC-2018 10:24:42  
 Current\_time = 24-DEC-2018 10:24:59

Comment = single pulse decouple  
 Data\_format = 1D COMPLEX  
 Dim\_size = 26214  
 Dim\_title = 13C  
 Dim\_units = [ppm]  
 Dimensions = X  
 Site = ECX 400  
 Spectrometer = JNM-ECX400

Field\_strength = 9.389766[T] (400[MHz])  
 X\_acq\_duration = 1.04333312[s]  
 X\_domain = 13C  
 X\_freq = 100.52530333[MHz]  
 X\_offset = 120[ppm]  
 X\_points = 32768  
 X\_prescans = 4  
 X\_resolution = 0.95846665[Hz]  
 X\_sweep = 31.40703518[kHz]  
 Irr\_domain = 1H  
 Irr\_freq = 399.78219838[MHz]  
 Irr\_offset = 5[ppm]  
 Clipped = TRUE  
 Mod\_return = 1  
 Scans = 1000  
 Total\_scans = 1000

X\_90\_width = 8.16[us]  
 X\_acq\_time = 1.04333312[s]  
 X\_angle = 30[deg]  
 X\_atn = 7.8[dB]  
 X\_pulse = 2.72[us]  
 Irr\_atn\_dec = 22.703[dB]  
 Irr\_atn\_noe = 22.703[dB]  
 Irr\_noise = WALTZ  
 Decoupling = TRUE  
 Initial\_wait = 1[s]  
 Noe = TRUE  
 Noe\_time = 2[s]  
 Recvr\_gain = 44  
 Relaxation\_delay = 2[s]  
 Repetition\_time = 3.04333312[s]  
 Temp\_get = 22.3[dc]



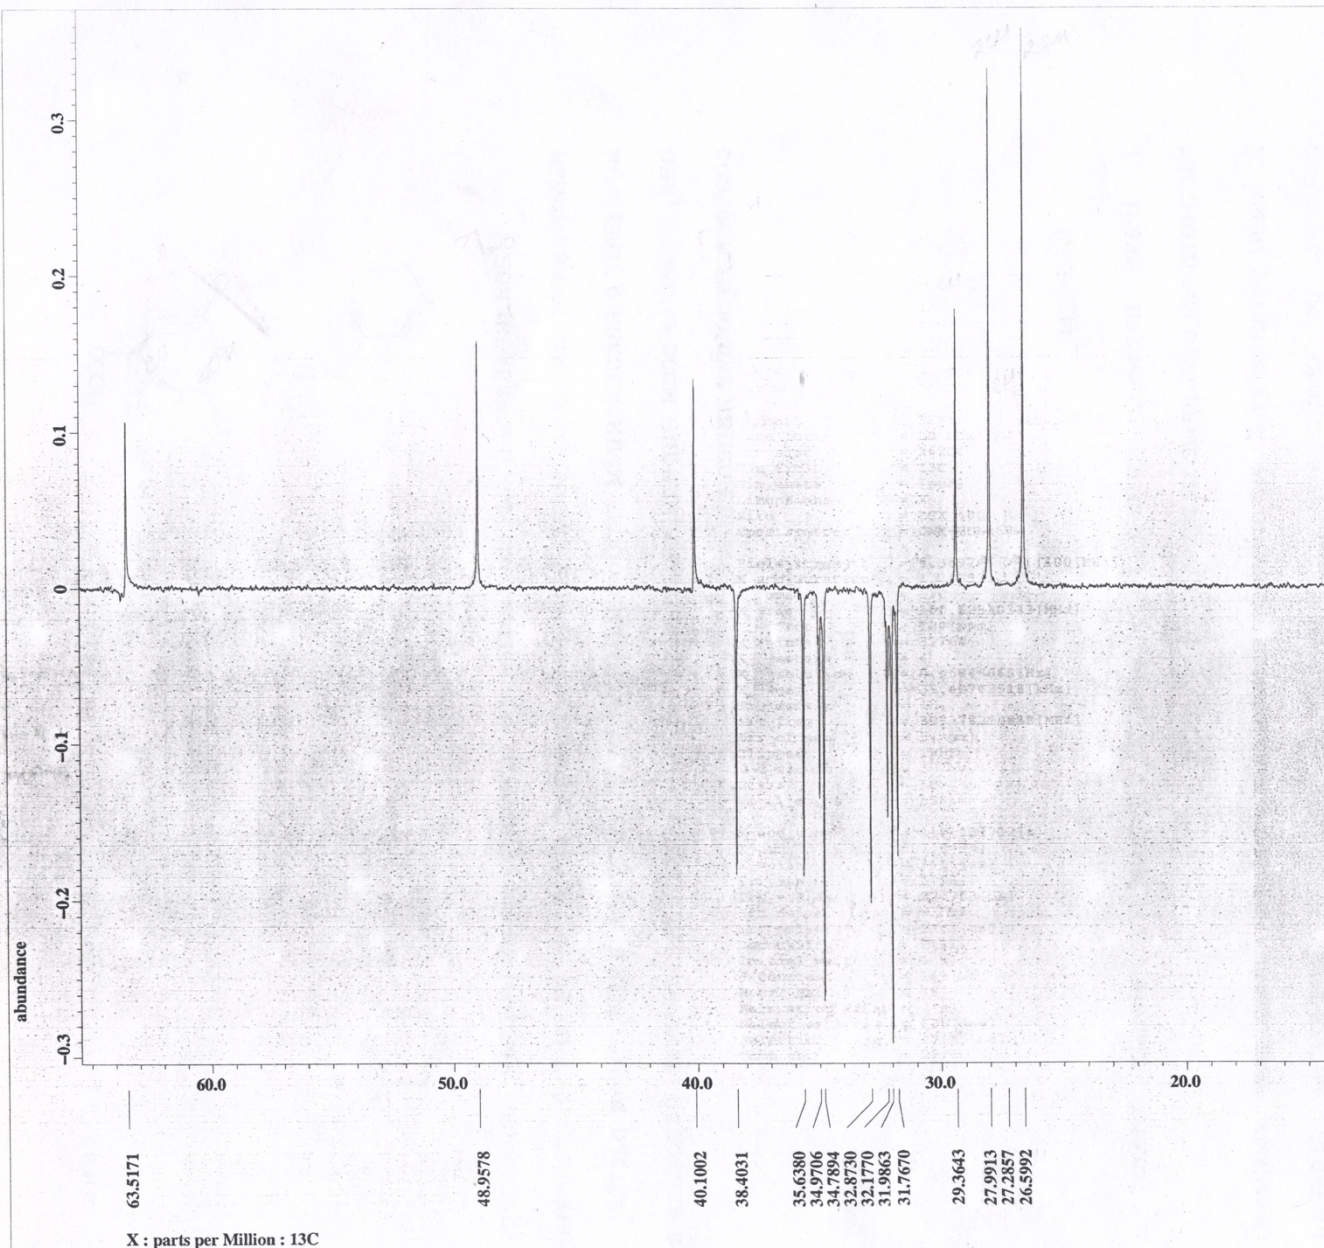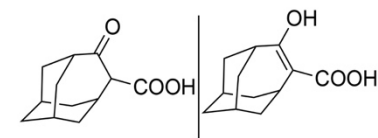

Filename = TIM\_DEPT135\_173-4.jdf  
 Author = delta  
 Experiment = dept.ex2  
 Sample\_id = TIM\_173  
 Solvent = CHLOROFORM-D  
 Creation\_time = 21-DEC-2018 17:57:50  
 Revision\_time = 24-DEC-2018 10:25:24  
 Current\_time = 24-DEC-2018 10:25:34

Comment = DEPT with decoupling  
 Data\_format = 1D COMPLEX  
 Dim\_size = 26214  
 Dim\_title = 13C  
 Dim\_units = [ppm]  
 Dimensions = X  
 Site = ECX 400  
 Spectrometer = JNM-ECX400

Field\_strength = 9.389766[T] (400[MHz])  
 X\_acq\_duration = 1.04333312[s]  
 X\_domain = 13C  
 X\_freq = 100.52530333[MHz]  
 X\_offset = 120[ppm]  
 X\_points = 32768  
 X\_prescans = 4  
 X\_resolution = 0.95846665[Hz]  
 X\_sweep = 31.40703518[kHz]  
 Irr\_domain = 1H  
 Irr\_freq = 399.78219838[MHz]  
 Irr\_offset = 5[ppm]  
 Clipped = TRUE  
 Mod\_return = 1  
 Scans = 500  
 Total\_scans = 500

X\_acq\_time = 1.04333312[s]  
 X\_atn = 7.8[dB]  
 X\_pulse = 8.16[us]  
 Irr\_atn = 3[dB]  
 Irr\_atn\_dec = 22.703[dB]  
 Irr\_noise = WALTZ  
 Irr\_pulse = 11.9[us]  
 Decoupling = TRUE  
 Initial\_wait = 1[s]  
 J\_constant = 140[Hz]  
 Recvr\_gain = 46  
 Relaxation\_delay = 2[s]  
 Selection\_angle = 135[deg]  
 Selection\_pulse = 17.85[us]  
 Temp\_get = 22[dc]







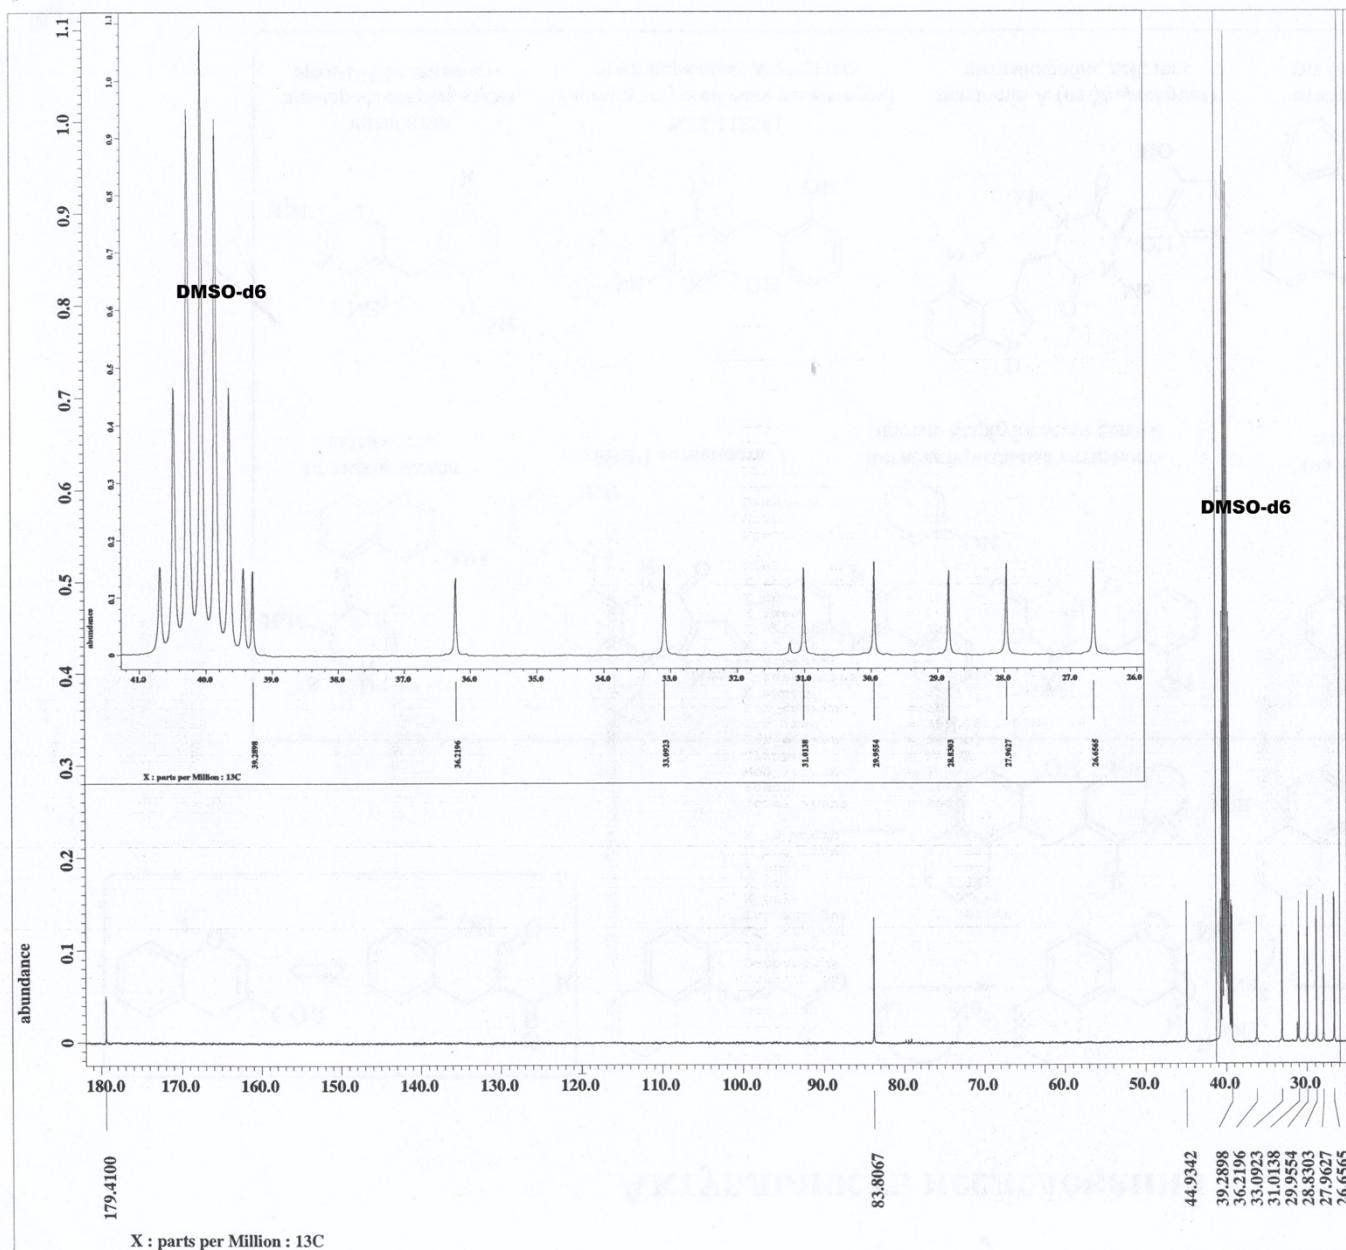

Filename = TIM\_13C\_152-4.jdf  
 Author = delta  
 Experiment = single\_pulse\_dec  
 Sample\_id = TIM\_152  
 Solvent = DMSO-D6  
 Creation\_time = 21-OCT-2018 20:30:50  
 Revision\_time = 23-OCT-2018 15:39:05  
 Current\_time = 23-OCT-2018 15:39:18

Comment = single pulse decouple  
 Data\_format = 1D COMPLEX  
 Dim\_size = 26214  
 Dim\_title = 13C  
 Dim\_units = [ppm]  
 Dimensions = X  
 Site = ECX 400  
 Spectrometer = JNM-ECX400

Field\_strength = 9.389766[T] (400[MHz])  
 X\_acq\_duration = 1.04333312[s]  
 X\_domain = 13C  
 X\_freq = 100.52530333[MHz]  
 X\_offset = 120[ppm]  
 X\_points = 32768  
 X\_prescans = 4  
 X\_resolution = 0.95846665[Hz]  
 X\_sweep = 31.40703518[kHz]  
 Irr\_domain = 1H  
 Irr\_freq = 399.78219838[MHz]  
 Irr\_offset = 5[ppm]  
 Clipped = FALSE  
 Mod\_return = 1  
 Scans = 3000  
 Total\_scans = 3000

X\_90\_width = 8.16[us]  
 X\_acq\_time = 1.04333312[s]  
 X\_angle = 30[deg]  
 X\_atn = 7.8[dB]  
 X\_pulse = 2.72[us]  
 Irr\_atn\_dec = 22.703[dB]  
 Irr\_atn\_noe = 22.703[dB]  
 Irr\_noise = WALTZ  
 Decoupling = TRUE  
 Initial\_wait = 1[s]  
 Noe = TRUE  
 Noe\_time = 2[s]  
 Recvr\_gain = 50  
 Relaxation\_delay = 2[s]  
 Repetition\_time = 3.04333312[s]  
 Temp\_get = 23.3[dc]



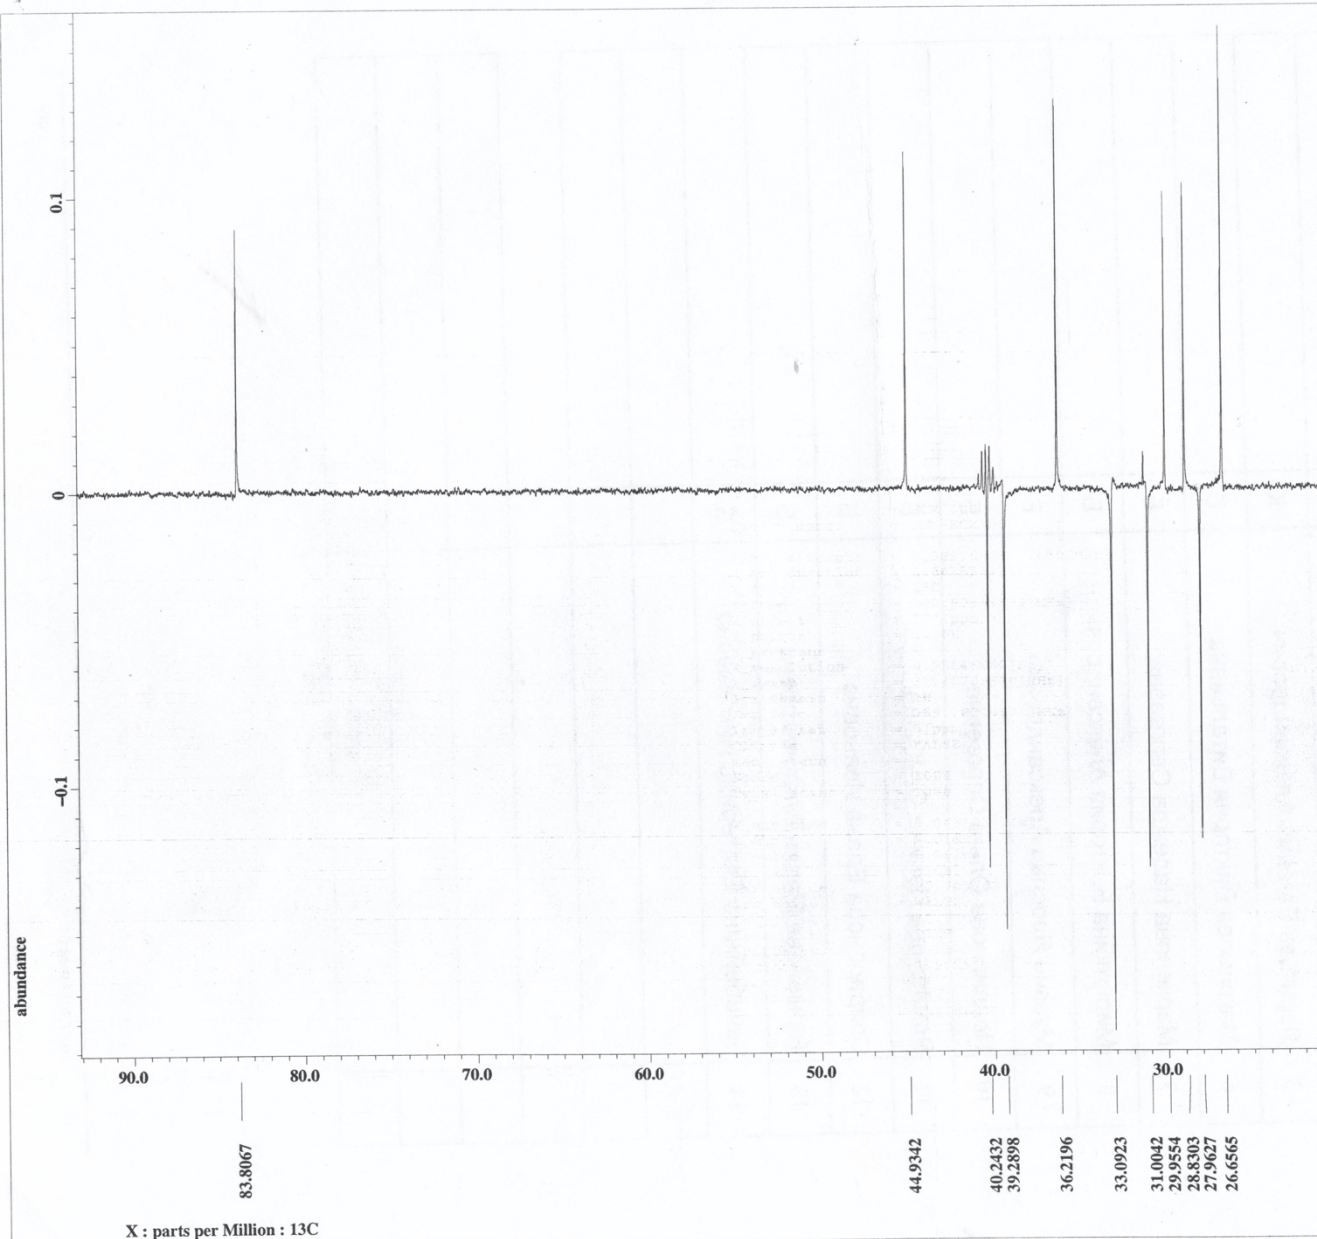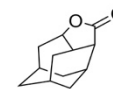

Filename = TIM\_DEPT135\_152-5.jdf  
 Author = delta  
 Experiment = dept.ex2  
 Sample\_id = TIM\_152  
 Solvent = DMSO-D6  
 Creation\_time = 21-OCT-2018 21:22:07  
 Revision\_time = 23-OCT-2018 15:39:29  
 Current\_time = 23-OCT-2018 15:39:34  
  
 Comment = DEPT with decoupling  
 Data\_format = 1D COMPLEX  
 Dim\_size = 26214  
 Dim\_title = 13C  
 Dim\_units = [ppm]  
 Dimensions = X  
 Site = ECX 400  
 Spectrometer = JNM-ECX400  
  
 Field\_strength = 9.389766[T] (400[MHz])  
 X\_acq\_duration = 1.04333312[s]  
 X\_domain = 13C  
 X\_freq = 100.52530333[MHz]  
 X\_offset = 120[ppm]  
 X\_points = 32768  
 X\_prescans = 4  
 X\_resolution = 0.95846665[Hz]  
 X\_sweep = 31.40703518[kHz]  
 Irr\_domain = 1H  
 Irr\_freq = 399.78219838[MHz]  
 Irr\_offset = 5[ppm]  
 Clipped = FALSE  
 Mod\_return = 1  
 Scans = 1000  
 Total\_scans = 1000  
  
 X\_acq\_time = 1.04333312[s]  
 X\_atn = 7.8[dB]  
 X\_pulse = 8.16[us]  
 Irr\_atn = 3[dB]  
 Irr\_atn\_dec = 22.703[dB]  
 Irr\_noise = WALTZ  
 Irr\_pulse = 11.9[us]  
 Decoupling = TRUE  
 Initial\_wait = 1[s]  
 J\_constant = 140[Hz]  
 Recvr\_gain = 46  
 Relaxation\_delay = 2[s]  
 Selection\_angle = 135[deg]  
 Selection\_pulse = 17.85[us]  
 Temp\_get = 23.2[degC]

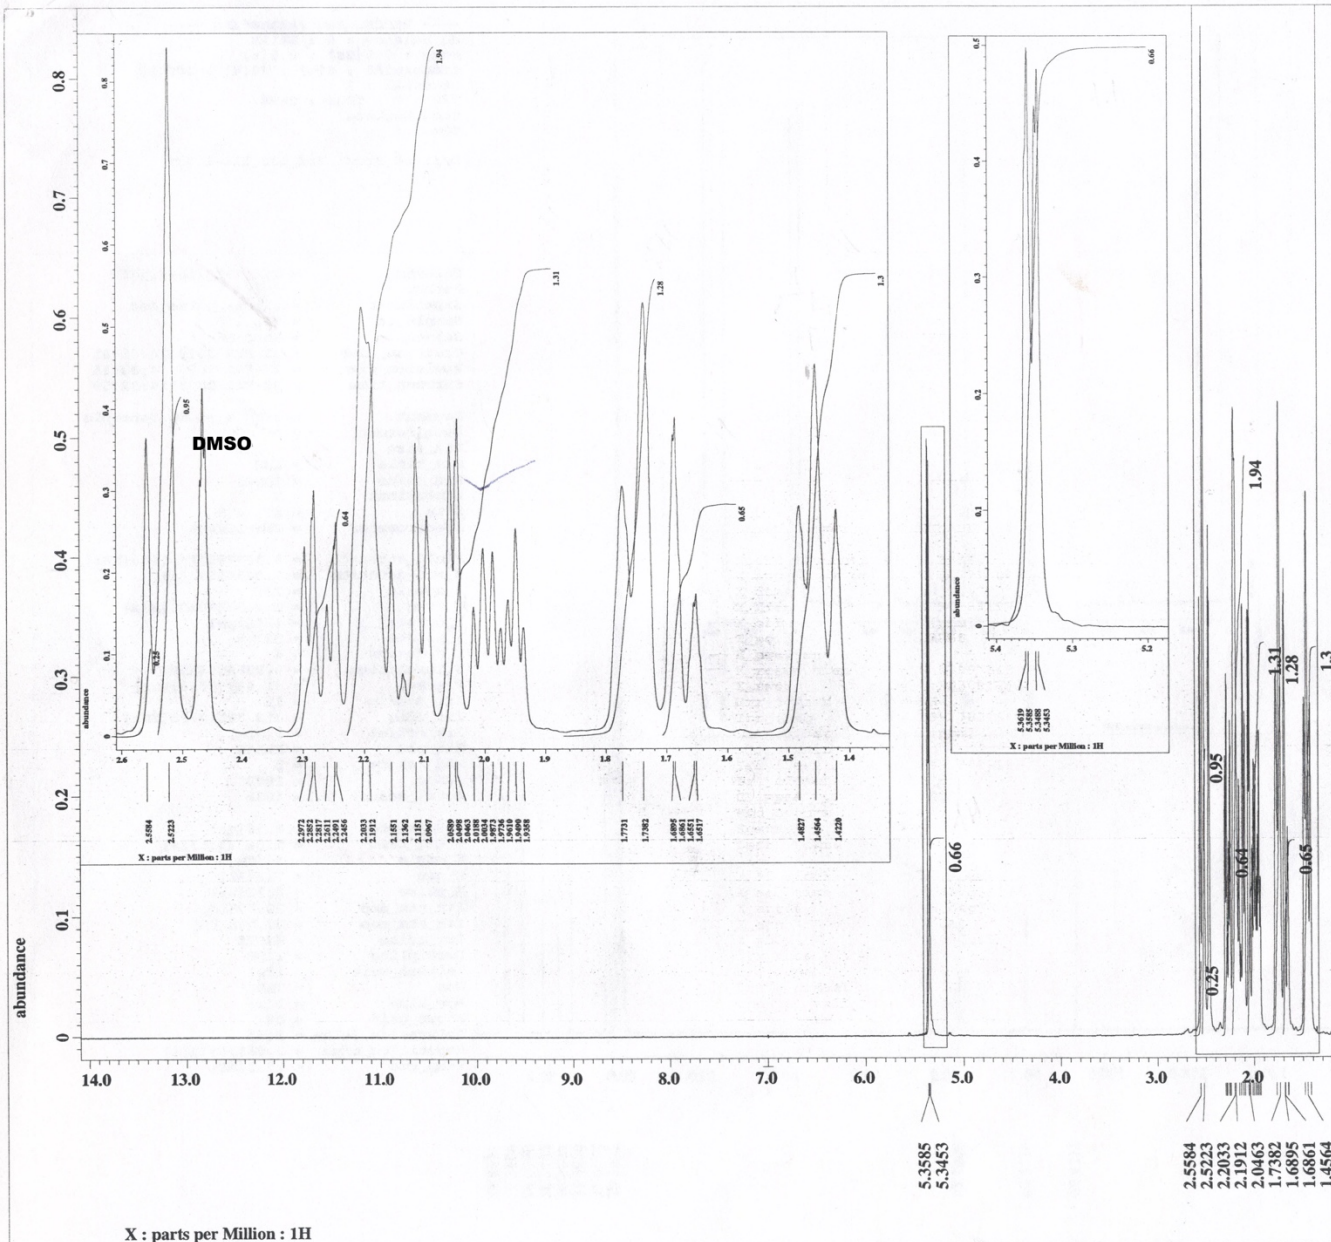



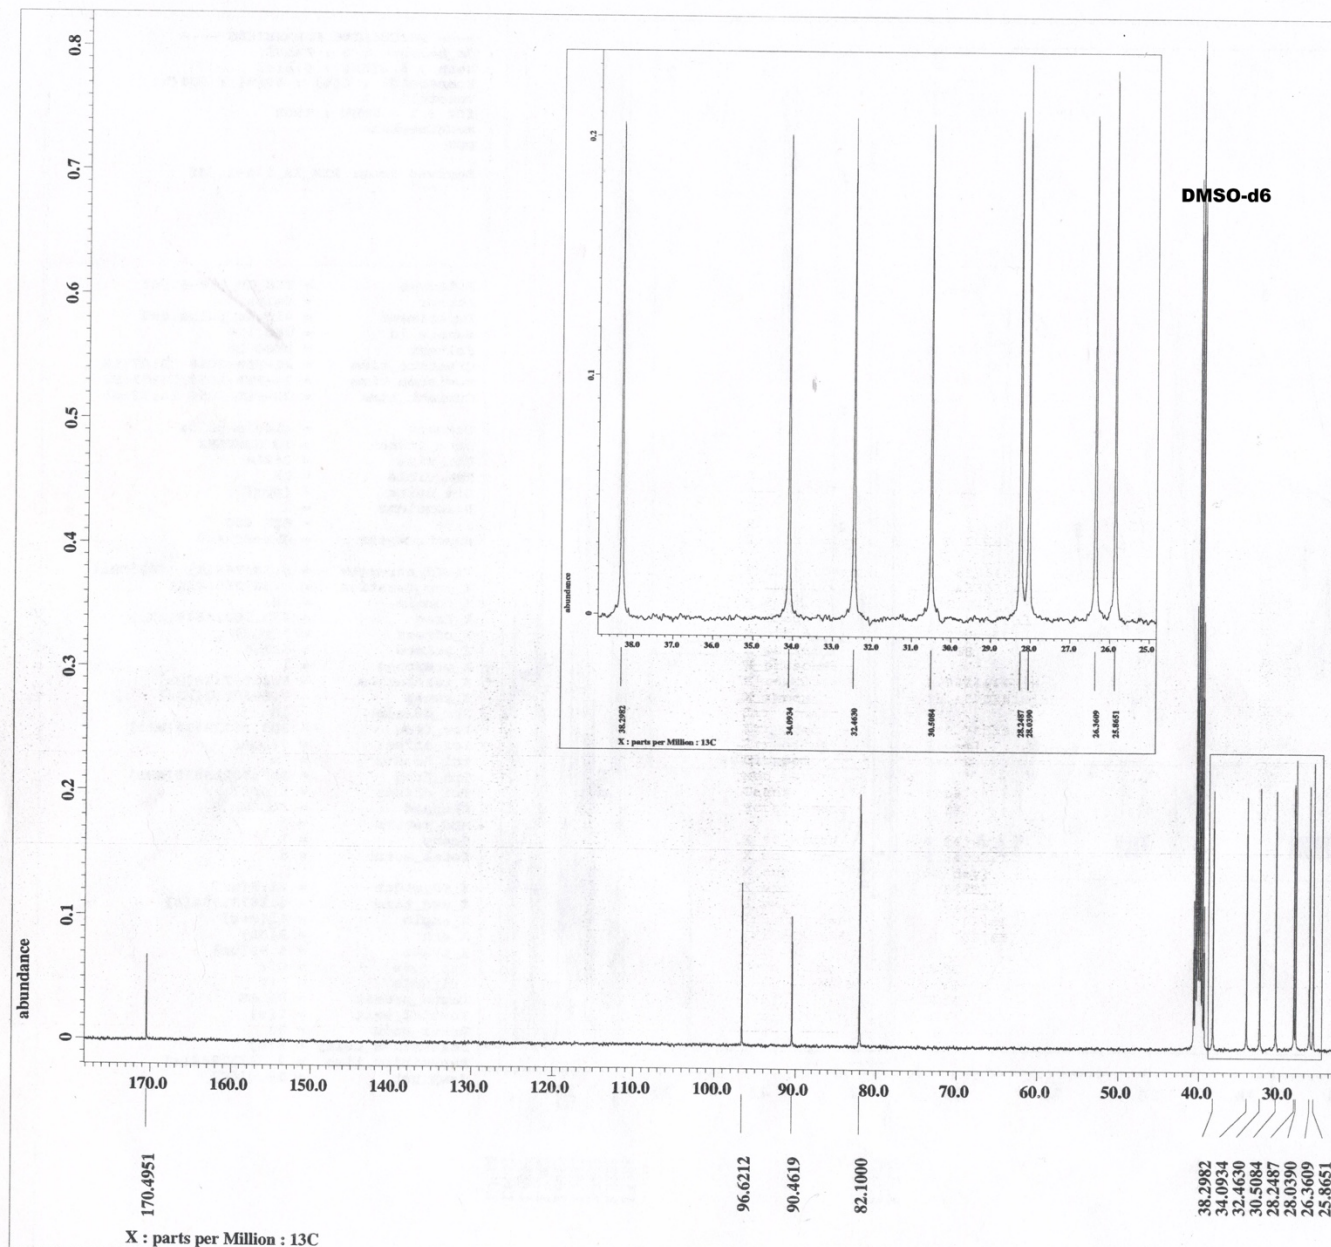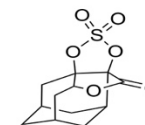

Filename = TIM\_13C\_110-4.jdf  
 Author = delta  
 Experiment = single\_pulse\_dec  
 Sample\_id = TIM\_110  
 Solvent = DMSO-D6  
 Creation\_time = 21-FEB-2018 14:01:41  
 Revision\_time = 22-FEB-2018 14:32:35  
 Current\_time = 22-FEB-2018 14:32:59

Comment = single pulse decouple  
 Data\_format = 1D COMPLEX  
 Dim\_size = 26214  
 Dim\_title = 13C  
 Dim\_units = [ppm]  
 Dimensions = X  
 Site = ECX 400  
 Spectrometer = JNM-ECX400

Field\_strength = 9.389766[T] (400 [MHz])  
 X\_acq\_duration = 1.04333312[s]  
 X\_domain = 13C  
 X\_freq = 100.52530333 [MHz]  
 X\_offset = 120 [ppm]  
 X\_points = 32768  
 X\_prescans = 4  
 X\_resolution = 0.95846665 [Hz]  
 X\_sweep = 31.40703518 [kHz]  
 Irr\_domain = 1H  
 Irr\_freq = 399.78219838 [MHz]  
 Irr\_offset = 5 [ppm]  
 Clipped = FALSE  
 Mod\_return = 1  
 Scans = 1000  
 Total\_scans = 1000

X\_90\_width = 8.16 [us]  
 X\_acq\_time = 1.04333312 [s]  
 X\_angle = 30 [deg]  
 X\_atn = 7.8 [dB]  
 X\_pulse = 2.72 [us]  
 Irr\_atn\_dec = 22.703 [dB]  
 Irr\_atn\_noe = 22.703 [dB]  
 Irr\_noise = WALTZ  
 Decoupling = TRUE  
 Initial\_wait = 1 [s]  
 Noe = TRUE  
 Noe\_time = 2 [s]  
 Recvr\_gain = 48  
 Relaxation\_delay = 2 [s]  
 Repetition\_time = 3.04333312 [s]  
 Temp\_get = 19.3 [dc]

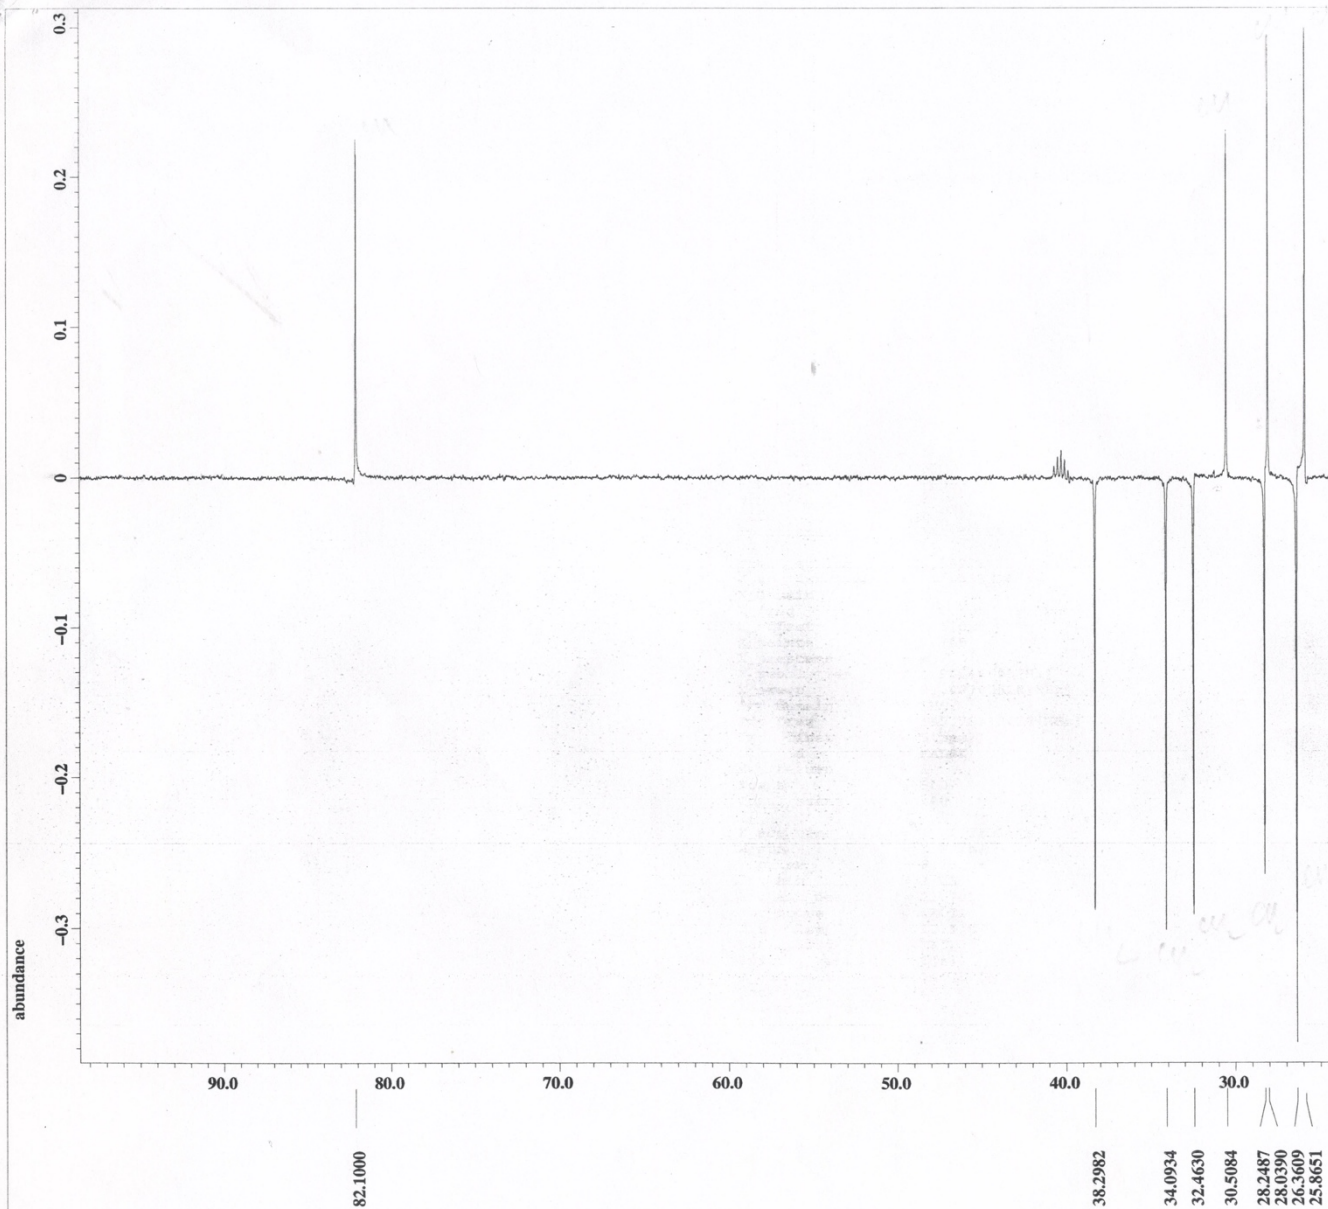

X : parts per Million : 13C

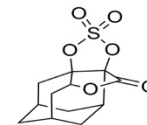

Filename = TIM\_DEPT135\_110-4.jdf  
 Author = delta  
 Experiment = dept.ex2  
 Sample\_id = TIM\_110  
 Solvent = DMSO-D6  
 Creation\_time = 21-FEB-2018 14:27:28  
 Revision\_time = 22-FEB-2018 14:33:11  
 Current\_time = 22-FEB-2018 14:33:20

Comment = DEPT with decoupling  
 Data\_format = 1D COMPLEX  
 Dim\_size = 26214  
 Dim\_title = 13C  
 Dim\_units = [ppm]  
 Dimensions = X  
 Site = ECX 400  
 Spectrometer = JNM-ECX400

Field\_strength = 9.389766[T] (400[MHz])  
 X\_acq\_duration = 1.04333312[s]  
 X\_domain = 13C  
 X\_freq = 100.52530333[MHz]  
 X\_offset = 120[ppm]  
 X\_points = 32768  
 X\_prescans = 4  
 X\_resolution = 0.95846665[Hz]  
 X\_sweep = 31.40703518[kHz]  
 Irr\_domain = 1H  
 Irr\_freq = 399.78219838[MHz]  
 Irr\_offset = 5[ppm]  
 Clipped = FALSE  
 Mod\_return = 1  
 Scans = 500  
 Total\_scans = 500

X\_acq\_time = 1.04333312[s]  
 X\_atn = 7.8[dB]  
 X\_pulse = 8.16[us]  
 Irr\_atn = 3[dB]  
 Irr\_atn\_dec = 22.703[dB]  
 Irr\_noise = WALTZ  
 Irr\_pulse = 11.9[us]  
 Decoupling = TRUE  
 Initial\_wait = 1[s]  
 J\_constant = 140[Hz]  
 Recvr\_gain = 46  
 Relaxation\_delay = 2[s]  
 Selection\_angle = 135[deg]  
 Selection\_pulse = 17.85[us]  
 Temp\_get = 19.1[dC]



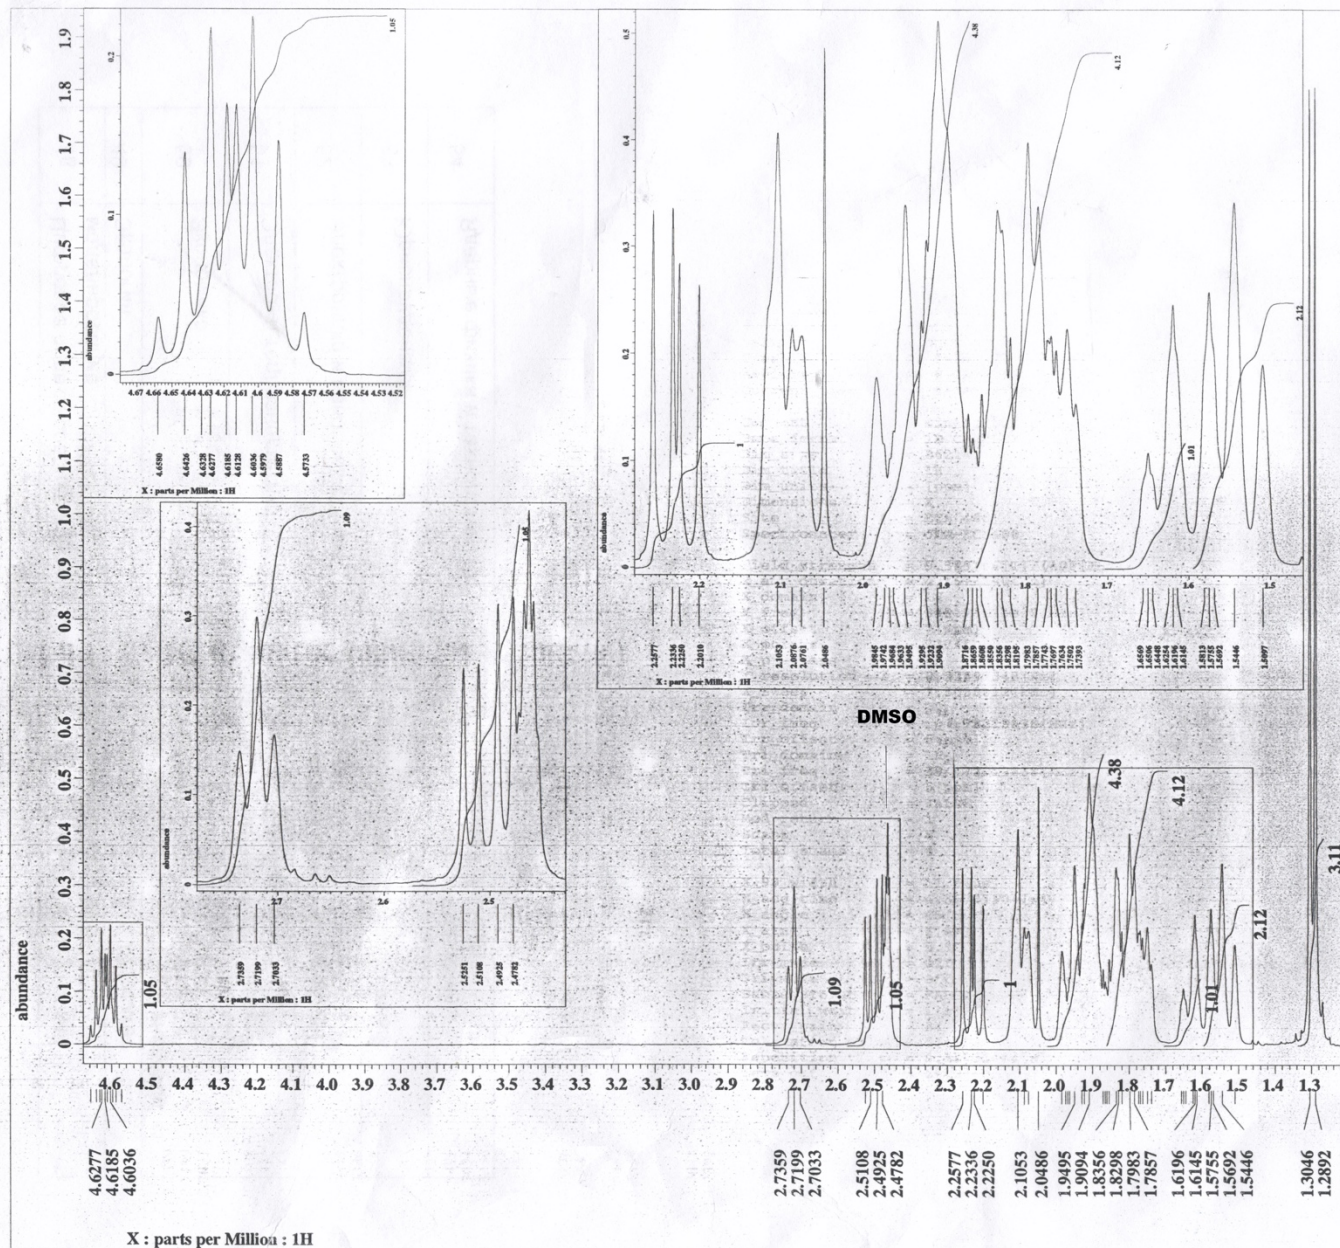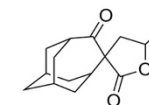

Filename = TIM\_1H\_176-4.jdf  
 Author = delta  
 Experiment = single\_pulse.ex2  
 Sample\_id = TIM\_176  
 Solvent = DMSO-D6  
 Creation\_time = 9-JAN-2019 12:31:11  
 Revision\_time = 9-JAN-2019 11:52:17  
 Current\_time = 9-JAN-2019 11:53:08

Comment = single\_pulse  
 Data\_format = 1D COMPLEX  
 Dim\_size = 26214  
 Dim\_title = 1H  
 Dim\_units = [ppm]  
 Dimensions = X  
 Site = ECX 400  
 Spectrometer = JNM-ECX400

Field\_strength = 9.389766[T] (400[MHz])  
 X\_acq\_duration = 4.36731904[s]  
 X\_domain = 1H  
 X\_freq = 399.78219838[MHz]  
 X\_offset = 7[ppm]  
 X\_points = 32768  
 X\_prescans = 1  
 X\_resolution = 0.22897343[Hz]  
 X\_sweep = 7.5030012[kHz]  
 Irr\_domain = 1H  
 Irr\_freq = 399.78219838[MHz]  
 Irr\_offset = 5[ppm]  
 Tri\_domain = 1H  
 Tri\_freq = 399.78219838[MHz]  
 Tri\_offset = 5[ppm]  
 Clipped = FALSE  
 Mod\_return = 1  
 Scans = 8  
 Total\_scans = 8

X\_90\_width = 11.9[us]  
 X\_acq\_time = 4.36731904[s]  
 X\_angle = 45[deg]  
 X\_atn = 3[db]  
 X\_pulse = 5.95[us]  
 Irr\_mode = Off  
 Tri\_mode = Off  
 Dante\_presat = FALSE  
 Initial\_wait = 1[s]  
 Recvr\_gain = 34  
 Relaxation\_delay = 5[s]  
 Repetition\_time = 9.36731904[s]  
 Temp\_get = 25.2[dc]



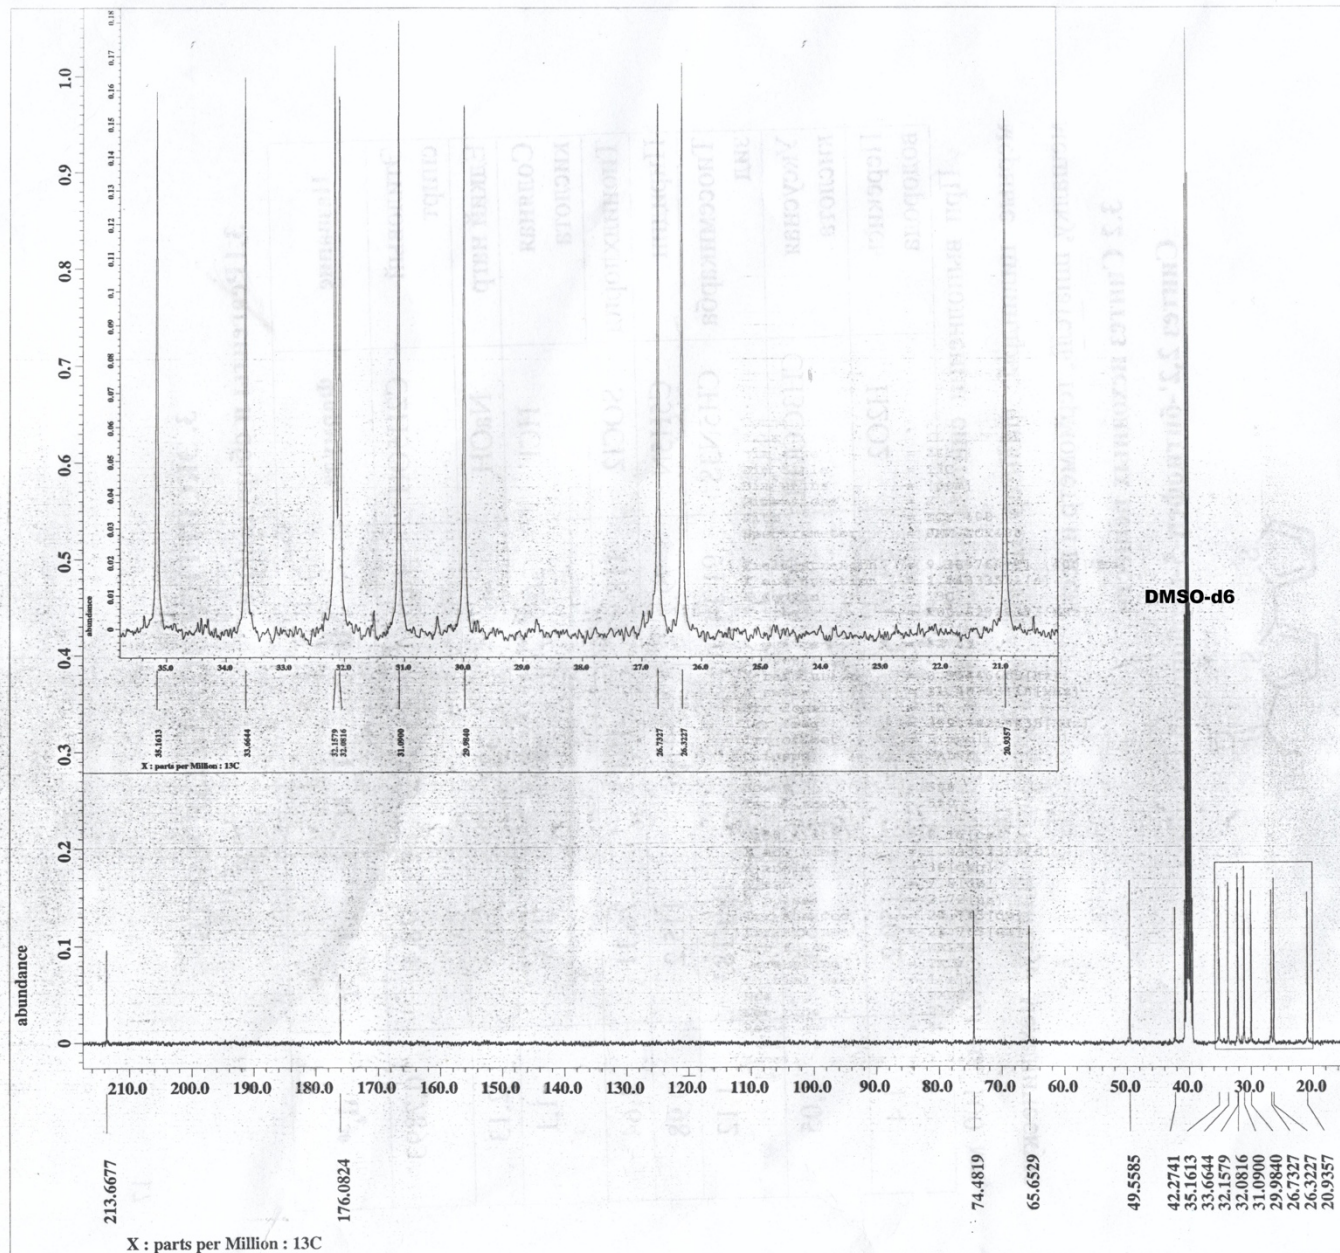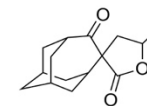

Filename = TIM\_13C\_176-3.jdf  
 Author = delta  
 Experiment = single\_pulse\_dec  
 Sample\_id = TIM\_176  
 Solvent = DMSO-D6  
 Creation\_time = 9-JAN-2019 13:03:27  
 Revision\_time = 9-JAN-2019 12:33:43  
 Current\_time = 9-JAN-2019 12:34:00

Comment = single pulse decouple  
 Data\_format = 1D COMPLEX  
 Dim\_size = 26214  
 Dim\_title = 13C  
 Dim\_units = [ppm]  
 Dimensions = X  
 Site = ECX 400  
 Spectrometer = JNM-ECX400

Field\_strength = 9.389766[T] (400[MHz])  
 X\_acq\_duration = 1.04333312[s]  
 X\_domain = 13C  
 X\_freq = 100.52530333[MHz]  
 X\_offset = 120[ppm]  
 X\_points = 32768  
 X\_prescans = 4  
 X\_resolution = 0.95846665[Hz]  
 X\_sweep = 31.40703518[kHz]  
 Irr\_domain = 1H  
 Irr\_freq = 399.78219838[MHz]  
 Irr\_offset = 5[ppm]  
 Clipped = FALSE  
 Mod\_return = 1  
 Scans = 590  
 Total\_scans = 590

X\_90\_width = 8.16[us]  
 X\_acq\_time = 1.04333312[s]  
 X\_angle = 30[deg]  
 X\_atn = 7.8[dB]  
 X\_pulse = 2.72[us]  
 Irr\_atn\_dec = 22.703[dB]  
 Irr\_atn\_noe = 22.703[dB]  
 Irr\_noise = WALTZ  
 Decoupling = TRUE  
 Initial\_wait = 1[s]  
 Noe = TRUE  
 Noe\_time = 2[s]  
 Recvr\_gain = 50  
 Relaxation\_delay = 2[s]  
 Repetition\_time = 3.04333312[s]  
 Temp\_get = 25.2[dC]



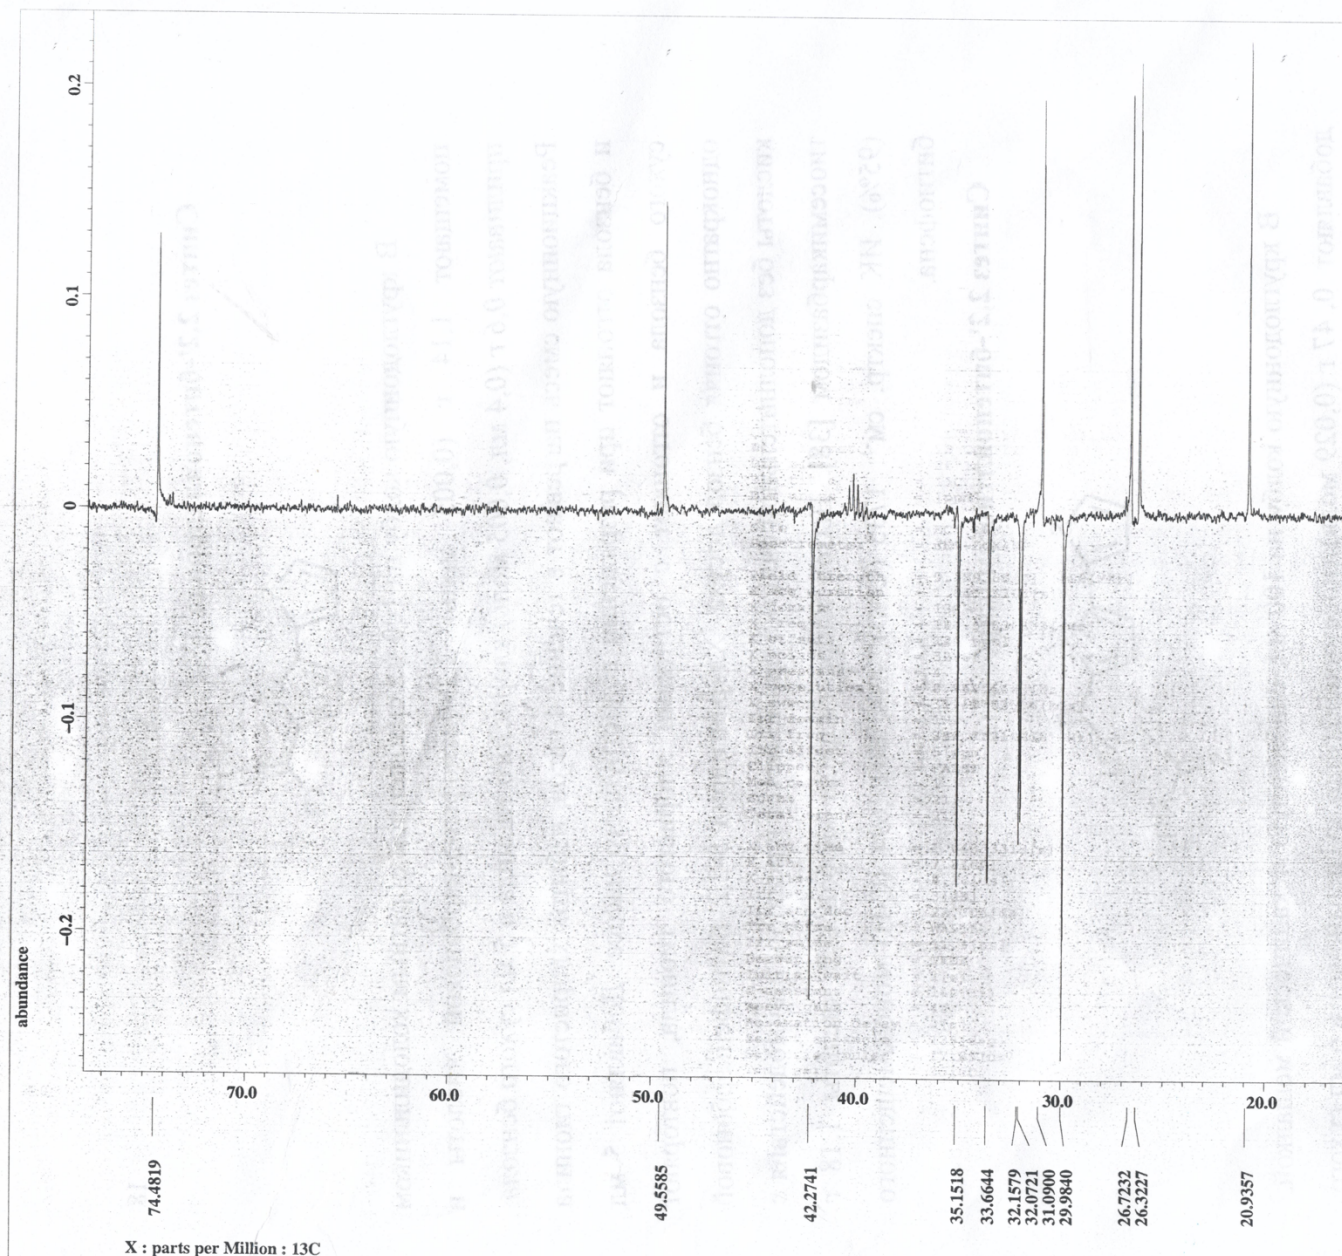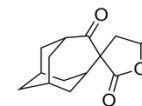

Filename = TIM\_DEPT135\_176-4.jdf  
 Author = delta  
 Experiment = dept.ex2  
 Sample\_id = TIM\_176  
 Solvent = DMSO-D6  
 Creation\_time = 9-JAN-2019 13:14:50  
 Revision\_time = 9-JAN-2019 12:34:13  
 Current\_time = 9-JAN-2019 12:35:19

Comment = DEPT with decoupling  
 Data\_format = 1D COMPLEX  
 Dim\_size = 26214  
 Dim\_title = 13C  
 Dim\_units = [ppm]  
 Dimensions = X  
 Site = ECX 400  
 Spectrometer = JNM-ECX400

Field\_strength = 9.389766[T] (400[MHz])  
 X\_acq\_duration = 1.04333312[s]  
 X\_domain = 13C  
 X\_freq = 100.52530333[MHz]  
 X\_offset = 120[ppm]  
 X\_points = 32768  
 X\_prescans = 4  
 X\_resolution = 0.95846665[Hz]  
 X\_sweep = 31.40703518[kHz]  
 Irr\_domain = 1H  
 Irr\_freq = 399.78219838[MHz]  
 Irr\_offset = 5[ppm]  
 Clipped = FALSE  
 Mod\_return = 1  
 Scans = 217  
 Total\_scans = 217

X\_acq\_time = 1.04333312[s]  
 X\_atn = 7.8[db]  
 X\_pulse = 8.16[us]  
 Irr\_atn = 3[db]  
 Irr\_atn\_dec = 22.703[db]  
 Irr\_noise = WALTZ  
 Irr\_pulse = 11.9[us]  
 Decoupling = TRUE  
 Initial\_wait = 1[s]  
 J\_constant = 140[Hz]  
 Recvr\_gain = 46  
 Relaxation\_delay = 2[s]  
 Selection\_angle = 135[deg]  
 Selection\_pulse = 17.85[us]  
 Temp\_get = 25[dc]



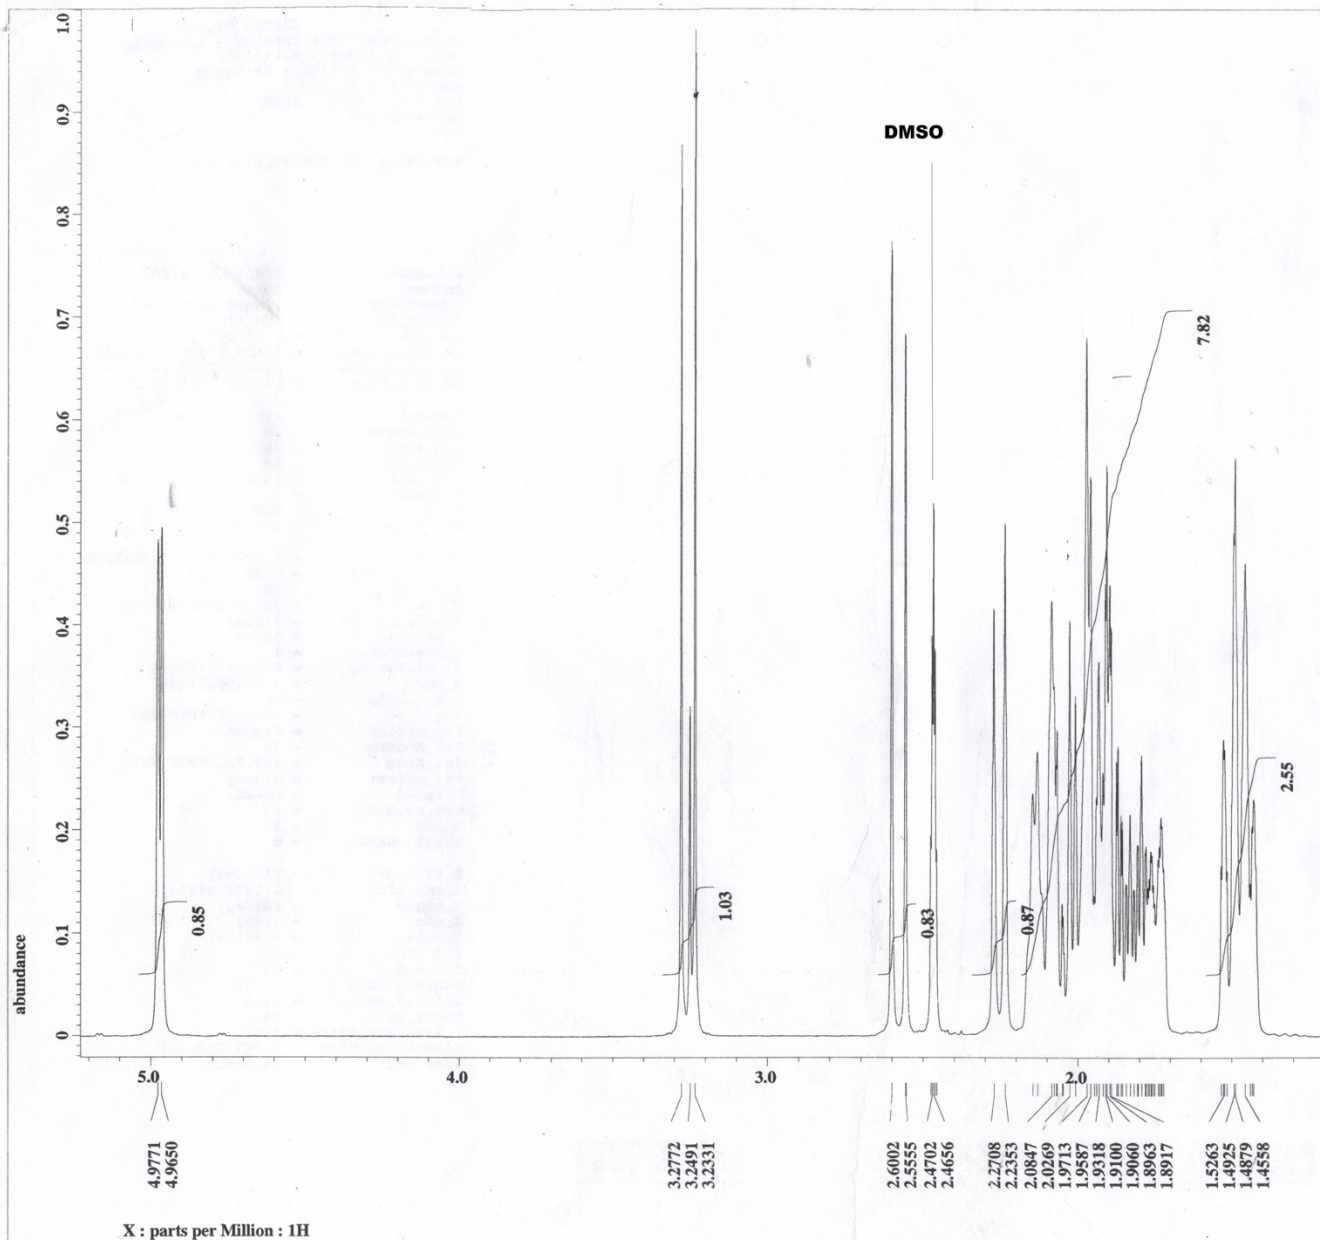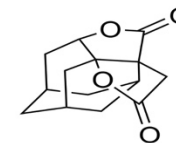

Filename = TIM\_1H\_89-4.jdf  
 Author = delta  
 Experiment = single\_pulse.ex2  
 Sample\_id = TIM\_89  
 Solvent = DMSO-D6  
 Creation\_time = 13-DEC-2017 23:15:33  
 Revision\_time = 14-DEC-2017 14:37:43  
 Current\_time = 14-DEC-2017 14:37:56

Comment = single\_pulse  
 Data\_format = 1D COMPLEX  
 Dim\_size = 26214  
 Dim\_title = 1H  
 Dim\_units = [ppm]  
 Dimensions = X  
 Site = ECX 400  
 Spectrometer = JNM-ECX400

Field\_strength = 9.389766[T] (400[MHz])  
 X\_acq\_duration = 4.36731904[s]  
 X\_domain = 1H  
 X\_freq = 399.78219838[MHz]  
 X\_offset = 7[ppm]  
 X\_points = 32768  
 X\_prescans = 1  
 X\_resolution = 0.22897343[Hz]  
 X\_sweep = 7.5030012[kHz]  
 Irr\_domain = 1H  
 Irr\_freq = 399.78219838[MHz]  
 Irr\_offset = 5[ppm]  
 Tri\_domain = 1H  
 Tri\_freq = 399.78219838[MHz]  
 Tri\_offset = 5[ppm]  
 Clipped = FALSE  
 Mod\_return = 1  
 Scans = 8  
 Total\_scans = 8

X\_90\_width = 11.9[us]  
 X\_acq\_time = 4.36731904[s]  
 X\_angle = 45[deg]  
 X\_atn = 3[dB]  
 X\_pulse = 5.95[us]  
 Irr\_mode = Off  
 Tri\_mode = Off  
 Dante\_presat = FALSE  
 Initial\_wait = 1[s]  
 Recvr\_gain = 34  
 Relaxation\_delay = 5[s]  
 Repetition\_time = 9.36731904[s]  
 Temp\_get = 29.5[dc]



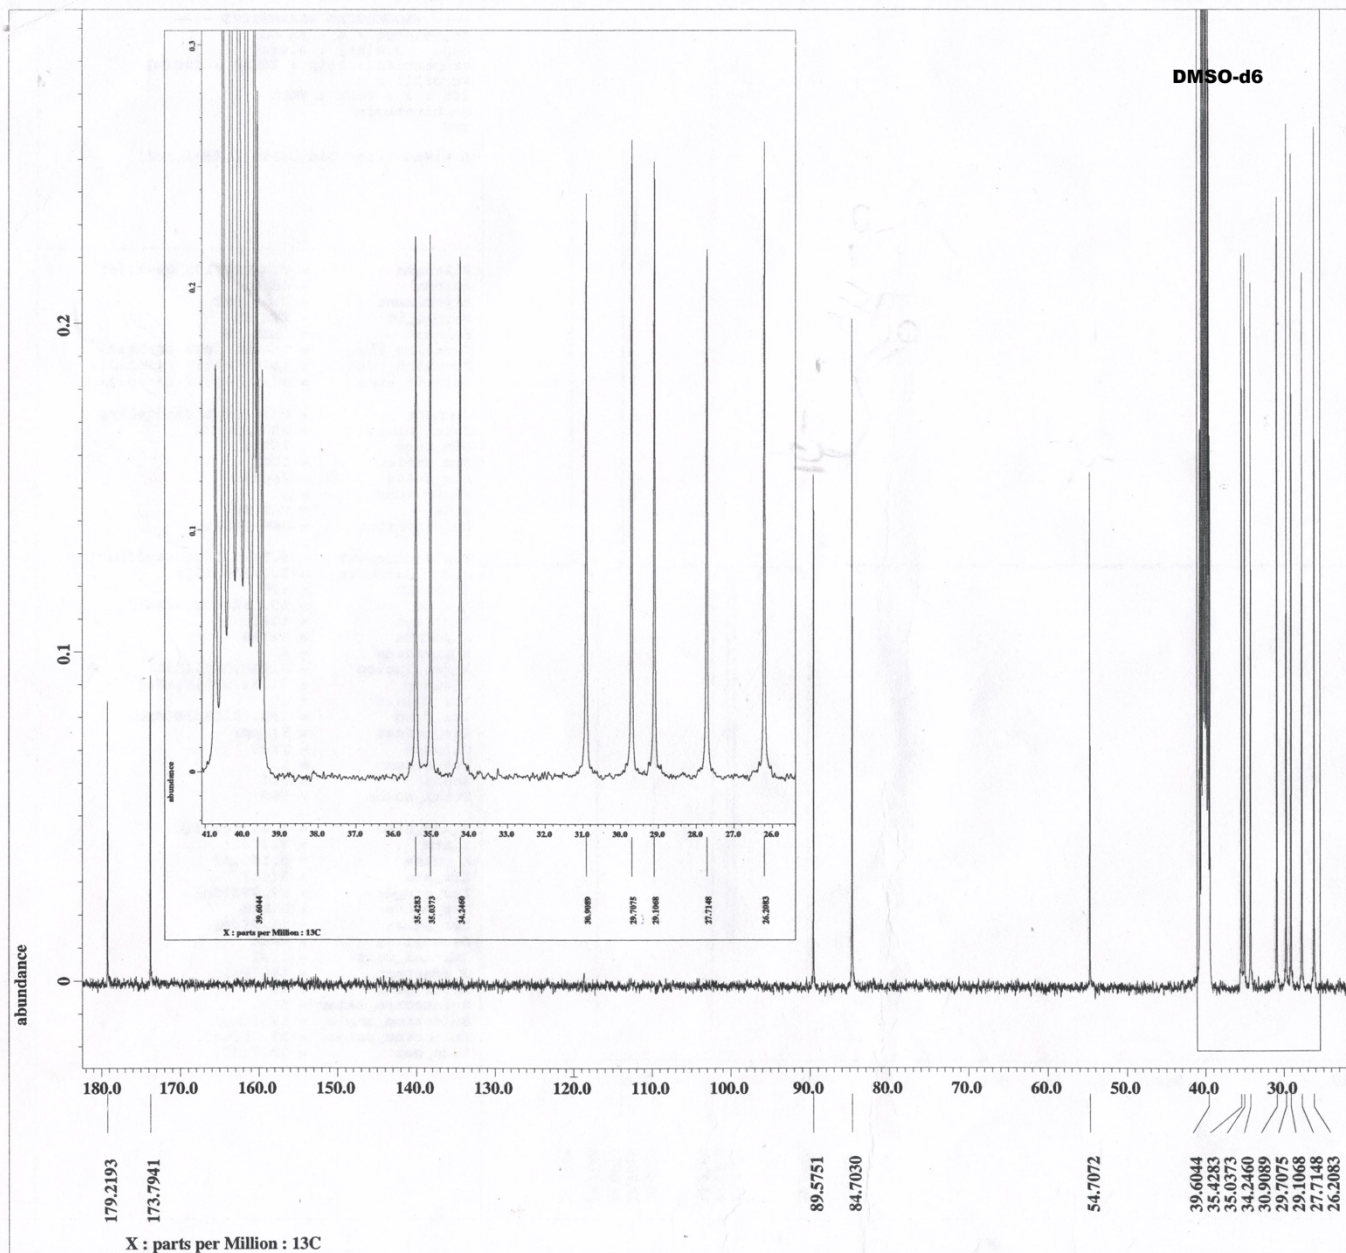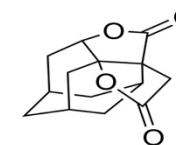

Filename = TIM\_13C\_89-3.jdf  
 Author = delta  
 Experiment = single\_pulse\_dec  
 Sample\_id = TIM\_89  
 Solvent = DMSO-D6  
 Creation\_time = 14-DEC-2017 00:08:42  
 Revision\_time = 14-DEC-2017 14:38:58  
 Current\_time = 14-DEC-2017 14:39:33

Comment = single pulse decouple  
 Data\_format = 1D COMPLEX  
 Dim\_size = 26214  
 Dim\_title = 13C  
 Dim\_units = [ppm]  
 Dimensions = X  
 Site = ECX 400  
 Spectrometer = JNM-ECX400

Field\_strength = 9.389766[T] (400[MHz])  
 X\_acq\_duration = 1.04333312[s]  
 X\_domain = 13C  
 X\_freq = 100.52530333[MHz]  
 X\_offset = 120[ppm]  
 X\_points = 32768  
 X\_prescans = 4  
 X\_resolution = 0.95846665[Hz]  
 X\_sweep = 31.40703518[kHz]  
 Irr\_domain = 1H  
 Irr\_freq = 399.78219838[MHz]  
 Irr\_offset = 5[ppm]  
 Clipped = TRUE  
 Mod\_return = 1  
 Scans = 1000  
 Total\_scans = 1000

X\_90\_width = 8.16[us]  
 X\_acq\_time = 1.04333312[s]  
 X\_angle = 30[deg]  
 X\_atn = 7.8[dB]  
 X\_pulse = 2.72[us]  
 Irr\_atn\_dec = 22.703[dB]  
 Irr\_atn\_noe = 22.703[dB]  
 Irr\_noise = WALTZ  
 Decoupling = TRUE  
 Initial\_wait = 1[s]  
 Noe = TRUE  
 Noe\_time = 2[s]  
 Recvr\_gain = 50  
 Relaxation\_delay = 2[s]  
 Repetition\_time = 3.04333312[s]  
 Temp\_get = 26.3[dc]

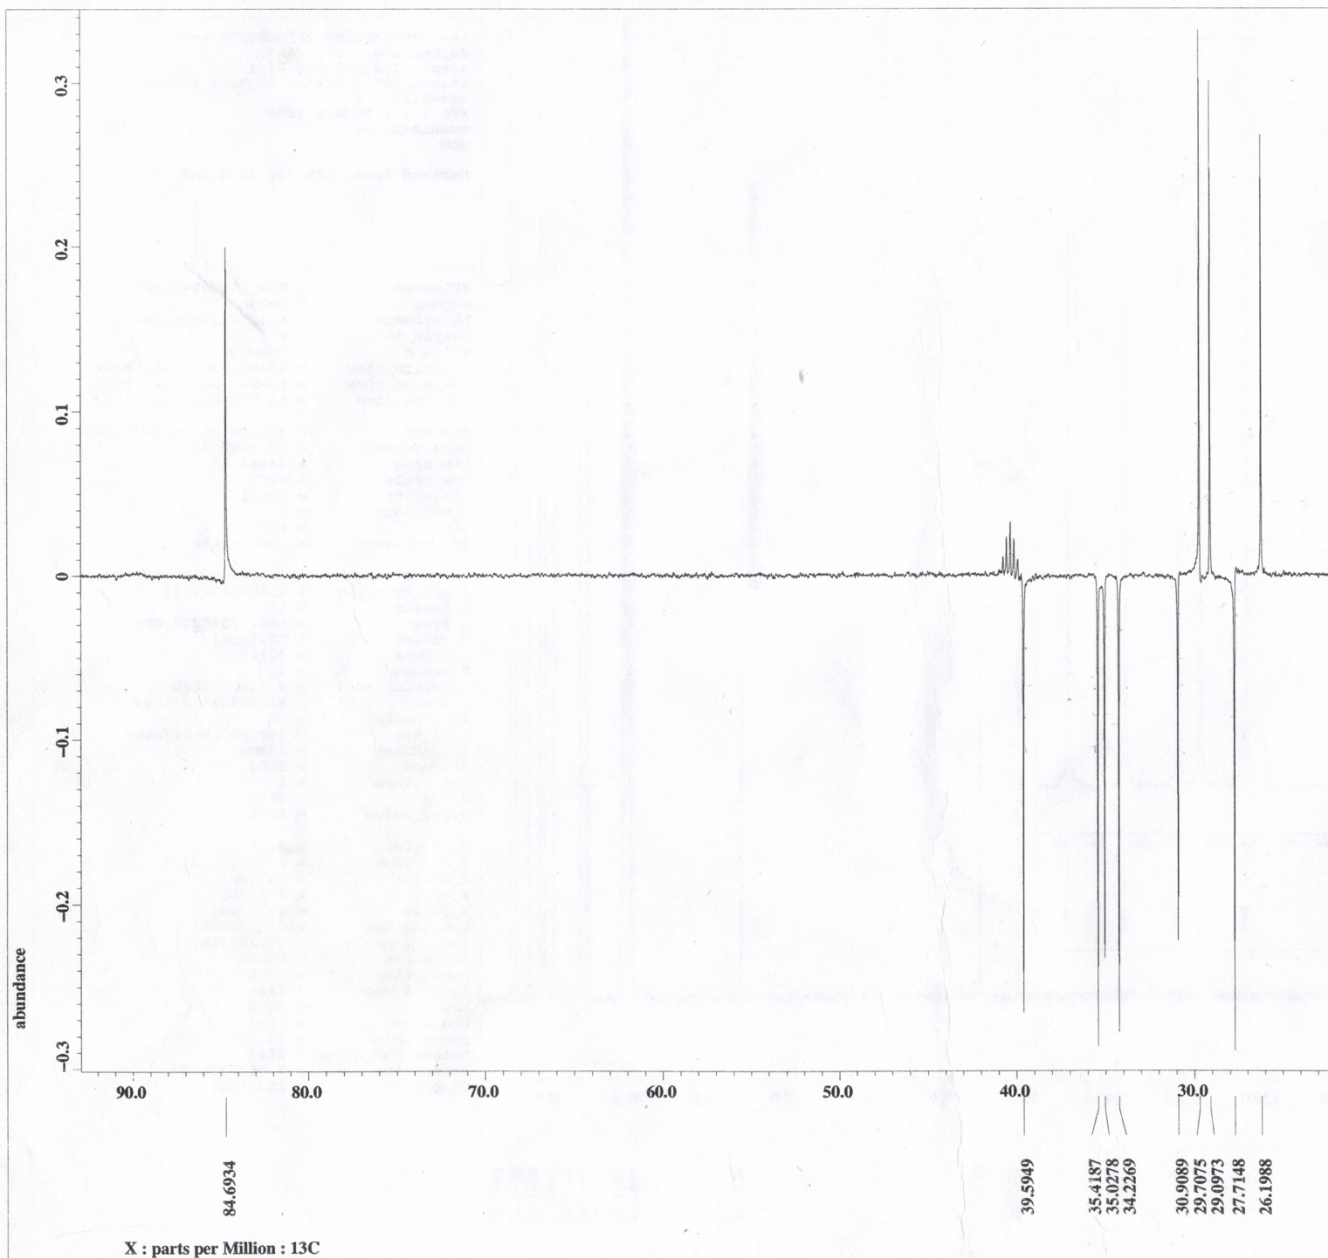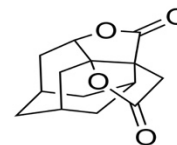

```

Filename      = TIM_DEPT135_89-3.jdf
Author        = delta
Experiment    = dept.ex2
Sample_id     = TIM_89
Solvent       = DMSO-D6
Creation_time  = 14-DEC-2017 00:34:31
Revision_time  = 14-DEC-2017 14:40:10
Current_time   = 14-DEC-2017 14:40:21

Comment       = DEPT with decoupling
Data_format   = 1D COMPLEX
Dim_size      = 26214
Dim_title     = 13C
Dim_units     = [ppm]
Dimensions    = X
Site          = ECK 400
Spectrometer   = JNM-ECK400

Field_strength = 9.389766[T] (400[MHz])
X_acq_duration = 1.04333312[s]
X_domain       = 13C
X_freq         = 100.52530333[MHz]
X_offset       = 120 [ppm]
X_points       = 32768
X_prescans     = 4
X_resolution   = 0.95846665[Hz]
X_sweep        = 31.40703518 [kHz]
Irr_domain     = 1H
Irr_freq       = 399.78219838[MHz]
Irr_offset     = 5 [ppm]
Clipped        = TRUE
Mod_return     = 1
Scans          = 500
Total_scans    = 500

X_acq_time     = 1.04333312[s]
X_atn          = 7.8[db]
X_pulse        = 8.16[us]
Irr_atn        = 3[db]
Irr_atn_dec    = 22.703[db]
Irr_noise      = WALTZ
Irr_pulse      = 11.9[us]
Decoupling     = TRUE
Initial_wait   = 1[s]
J_constant     = 140[Hz]
Recvr_gain     = 46
Relaxation_delay = 2[s]
Selection_angle = 135[deg]
Selection_pulse = 17.85[us]
Temp_get       = 25.7[dc]
  
```





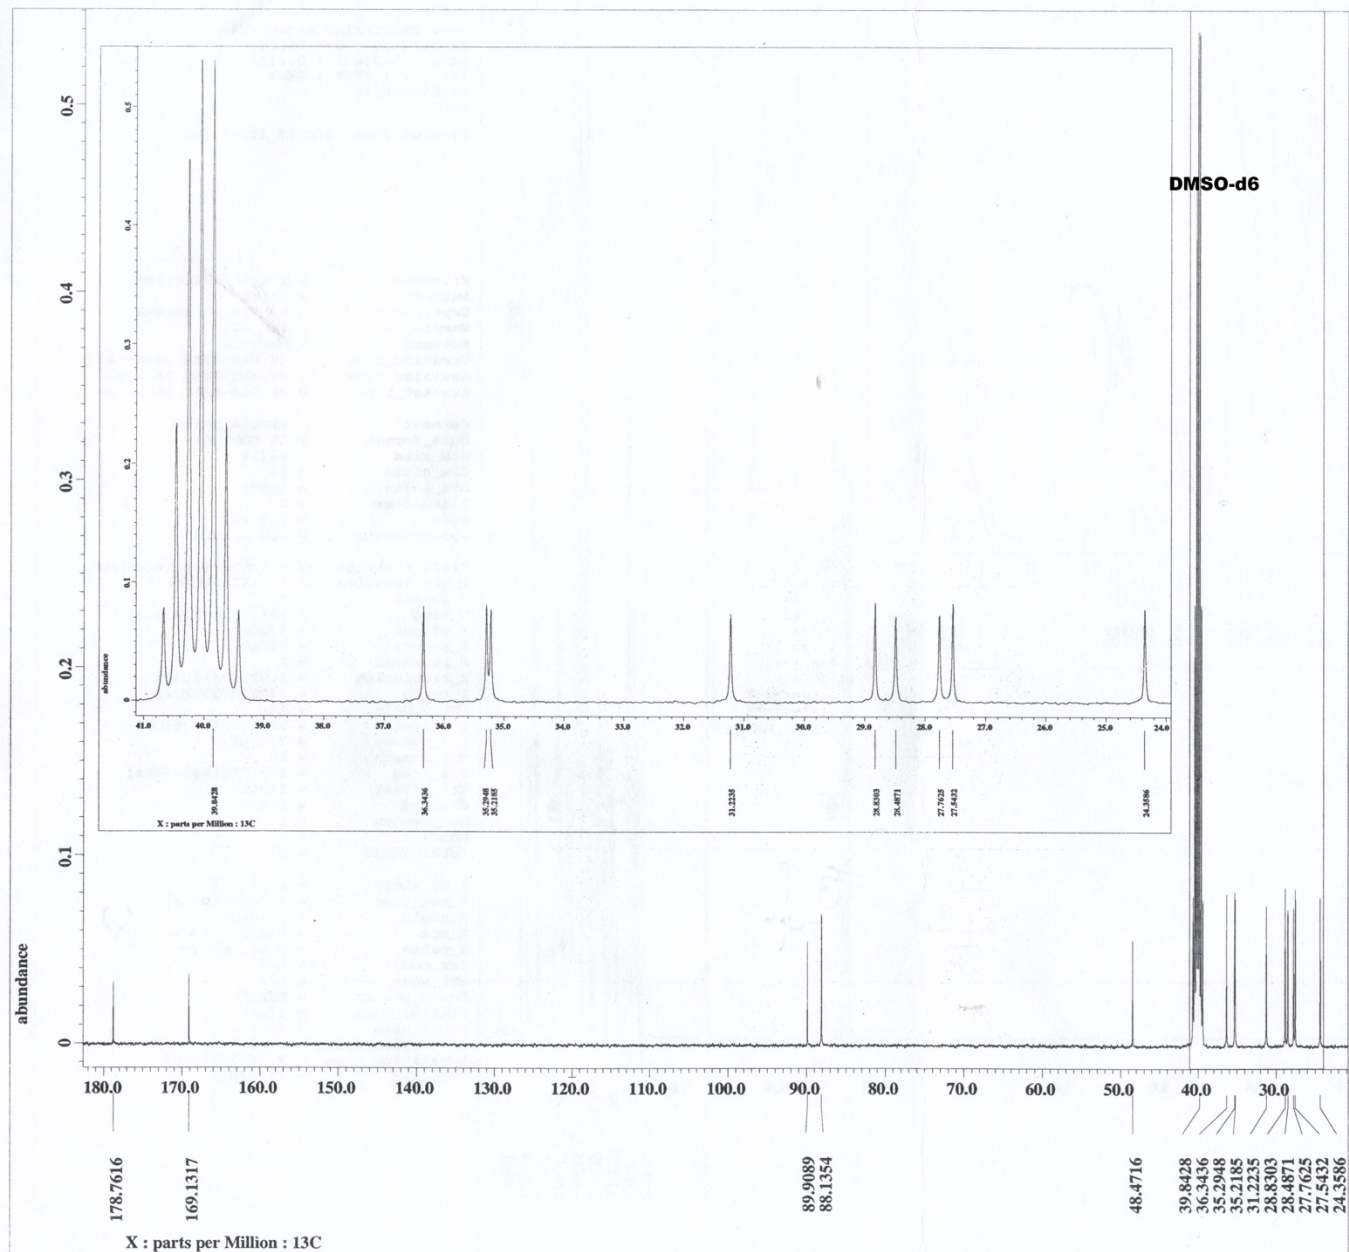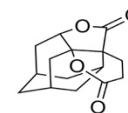

Filename = TIM\_13C\_122-3.jdf  
 Author = delta  
 Experiment = single\_pulse\_dec  
 Sample\_id = TIM\_122  
 Solvent = DMSO-D6  
 Creation\_time = 27-MAR-2018 17:41:40  
 Revision\_time = 28-MAR-2018 18:27:34  
 Current\_time = 28-MAR-2018 18:28:05

Comment = single pulse decouple  
 Data\_format = 1D\_COMPLEX  
 Dim\_size = 26214  
 Dim\_title = 13C  
 Dim\_units = [ppm]  
 Dimensions = X  
 Site = ECX 400  
 Spectrometer = JNM-ECX400

Field\_strength = 9.389766[T] (400[MHz])  
 X\_acq\_duration = 1.04333312[s]  
 X\_domain = 13C  
 X\_freq = 100.52530333[MHz]  
 X\_offset = 120[ppm]  
 X\_points = 32768  
 X\_prescans = 4  
 X\_resolution = 0.95846665[Hz]  
 X\_sweep = 31.40703518[kHz]  
 Irr\_domain = 1H  
 Irr\_freq = 399.78219838[MHz]  
 Irr\_offset = 5[ppm]  
 Clipped = FALSE  
 Mod\_return = 1  
 Scans = 1000  
 Total\_scans = 1000

X\_90\_width = 8.16[us]  
 X\_acq\_time = 1.04333312[s]  
 X\_angle = 30[deg]  
 X\_atn = 7.8[dB]  
 X\_pulse = 2.72[us]  
 Irr\_atn\_dec = 22.703[dB]  
 Irr\_atn\_noe = 22.703[dB]  
 Irr\_noise = WALTZ  
 Decoupling = TRUE  
 Initial\_wait = 1[s]  
 Noe = TRUE  
 Noe\_time = 2[s]  
 Recvr\_gain = 44  
 Relaxation\_delay = 2[s]  
 Repetition\_time = 3.04333312[s]  
 Temp\_get = 21.2[dc]



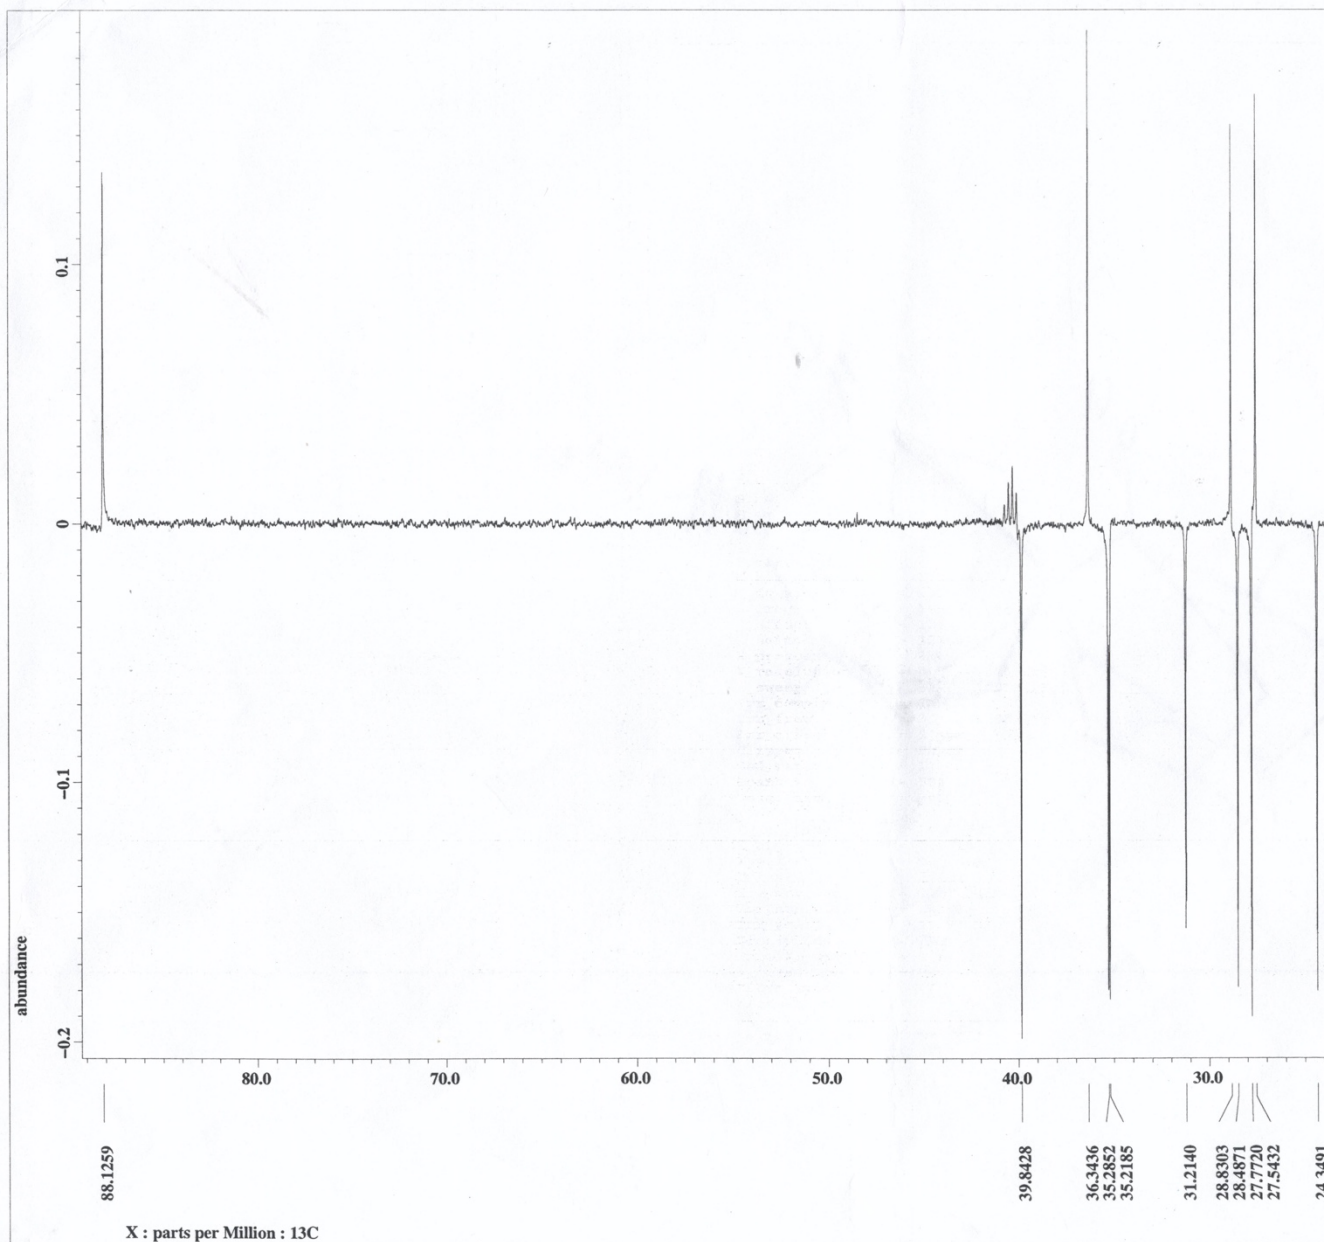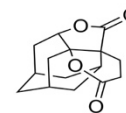

Filename = TIM\_DEPT135\_122-4.jdf  
 Author = delta  
 Experiment = dept.ex2  
 Sample\_id = TIM\_122  
 Solvent = DMSO-D6  
 Creation\_time = 27-MAR-2018 18:07:28  
 Revision\_time = 28-MAR-2018 18:26:56  
 Current\_time = 28-MAR-2018 18:28:11

Comment = DEPT with decoupling  
 Data\_format = 1D COMPLEX  
 Dim\_size = 26214  
 Dim\_title = 13C  
 Dim\_units = [ppm]  
 Dimensions = X  
 Site = ECU 400  
 Spectrometer = JNM-ECX400

Field\_strength = 9.389766[T] (400[MHz])  
 X\_acq\_duration = 1.04333312[s]  
 X\_domain = 13C  
 X\_freq = 100.52530333[MHz]  
 X\_offset = 120[ppm]  
 X\_points = 32768  
 X\_prescans = 4  
 X\_resolution = 0.95846665[Hz]  
 X\_sweep = 31.40703518[kHz]  
 Irr\_domain = 1H  
 Irr\_freq = 399.78219838[MHz]  
 Irr\_offset = 5[ppm]  
 Clipped = FALSE  
 Mod\_return = 1  
 Scans = 500  
 Total\_scans = 500

X\_acq\_time = 1.04333312[s]  
 X\_atn = 7.8[dB]  
 X\_pulse = 8.16[us]  
 Irr\_atn = 3[dB]  
 Irr\_atn\_dec = 22.703[dB]  
 Irr\_noise = WALTZ  
 Irr\_pulse = 11.9[us]  
 Decoupling = TRUE  
 Initial\_wait = 1[s]  
 J\_constant = 140[Hz]  
 Recvr\_gain = 46  
 Relaxation\_delay = 2[s]  
 Selection\_angle = 135[deg]  
 Selection\_pulse = 17.85[us]  
 Temp\_get = 20.4[degC]

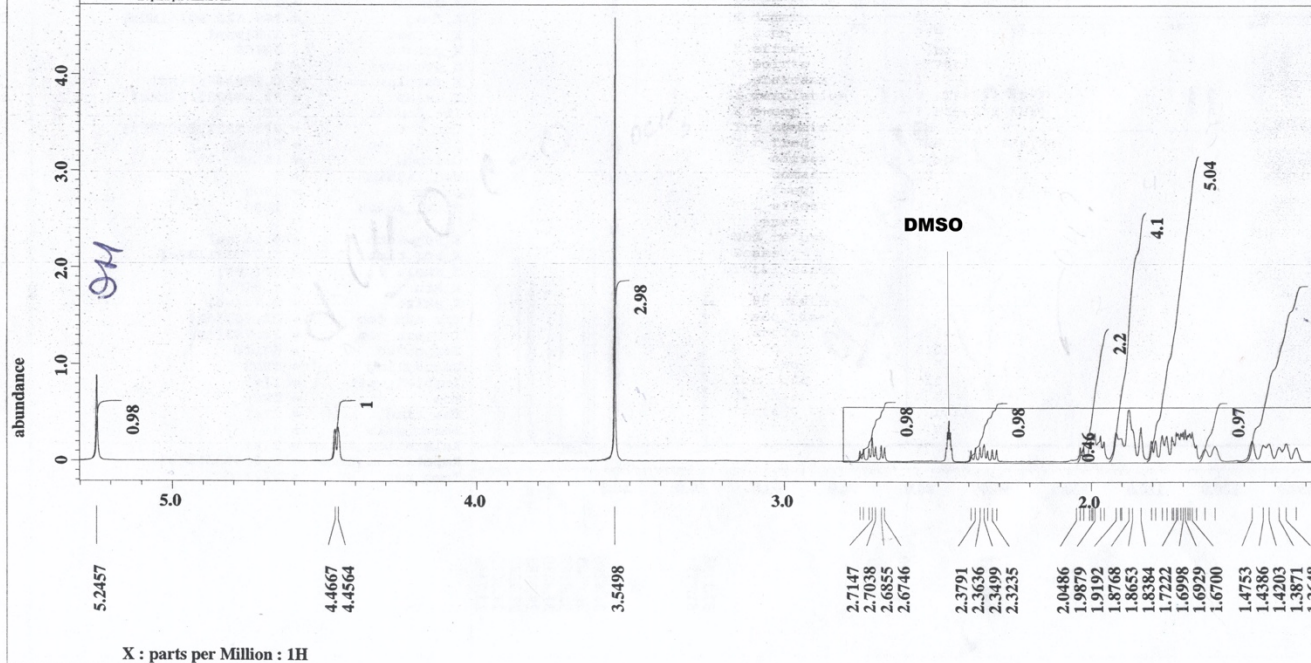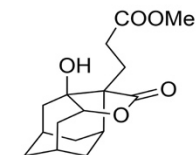

```

Filename      = TIM_1H_116-4.jdf
Author        = delta
Experiment     = single_pulse.ex2
Sample_id     = TIM_116
Solvent       = DMSO-D6
Creation_time  = 13-MAR-2018 04:00:15
Revision_time  = 13-MAR-2018 12:08:28
Current_time   = 13-MAR-2018 12:08:59

```

```

Comment      = single_pulse
Data_format  = 1D COMPLEX
Dim_size     = 26214
Dim_title    = 1H
Dim_units    = [ppm]
Dimensions   = X
Site         = ECX 400
Spectrometer = JNM-ECX400

```

```
Field_strength      = 9.389766[T] (400[MHz])
X_acq_duration      = 4.36731904[s]
X_domain            = 1H
X_freq              = 399.78219838[MHz]
X_offset            = 7[ppm]
X_points            = 32768
X_prescans          = 1
X_resolution        = 0.22897343[Hz]
X_sweep             = 7.5030012[kHz]
Irr_domain          = 1H
Irr_freq            = 399.78219838[MHz]
Irr_offset          = 5[ppm]
Tri_domain          = 1H
Tri_freq            = 399.78219838[MHz]
Tri_offset          = 5[ppm]
Clipped             = FALSE
Mod_return          = 1
Scans               = 8
Total_scans         = 8
```

```
X_90_width      = 11.9[us]
X_acq_time      = 4.36731904[s]
X_angle         = 45[deg]
X_atn           = 3[dB]
X_pulse         = 5.95[us]
Irr_mode        = Off
Tri_mode        = Off
Dante_presat    = FALSE
Initial_wait    = 1[s]
Recvr_gain      = 32
Relaxation_delay = 5[s]
Repetition_time = 9.36731904[s]
Temp_get        = 20.9[degC]
```



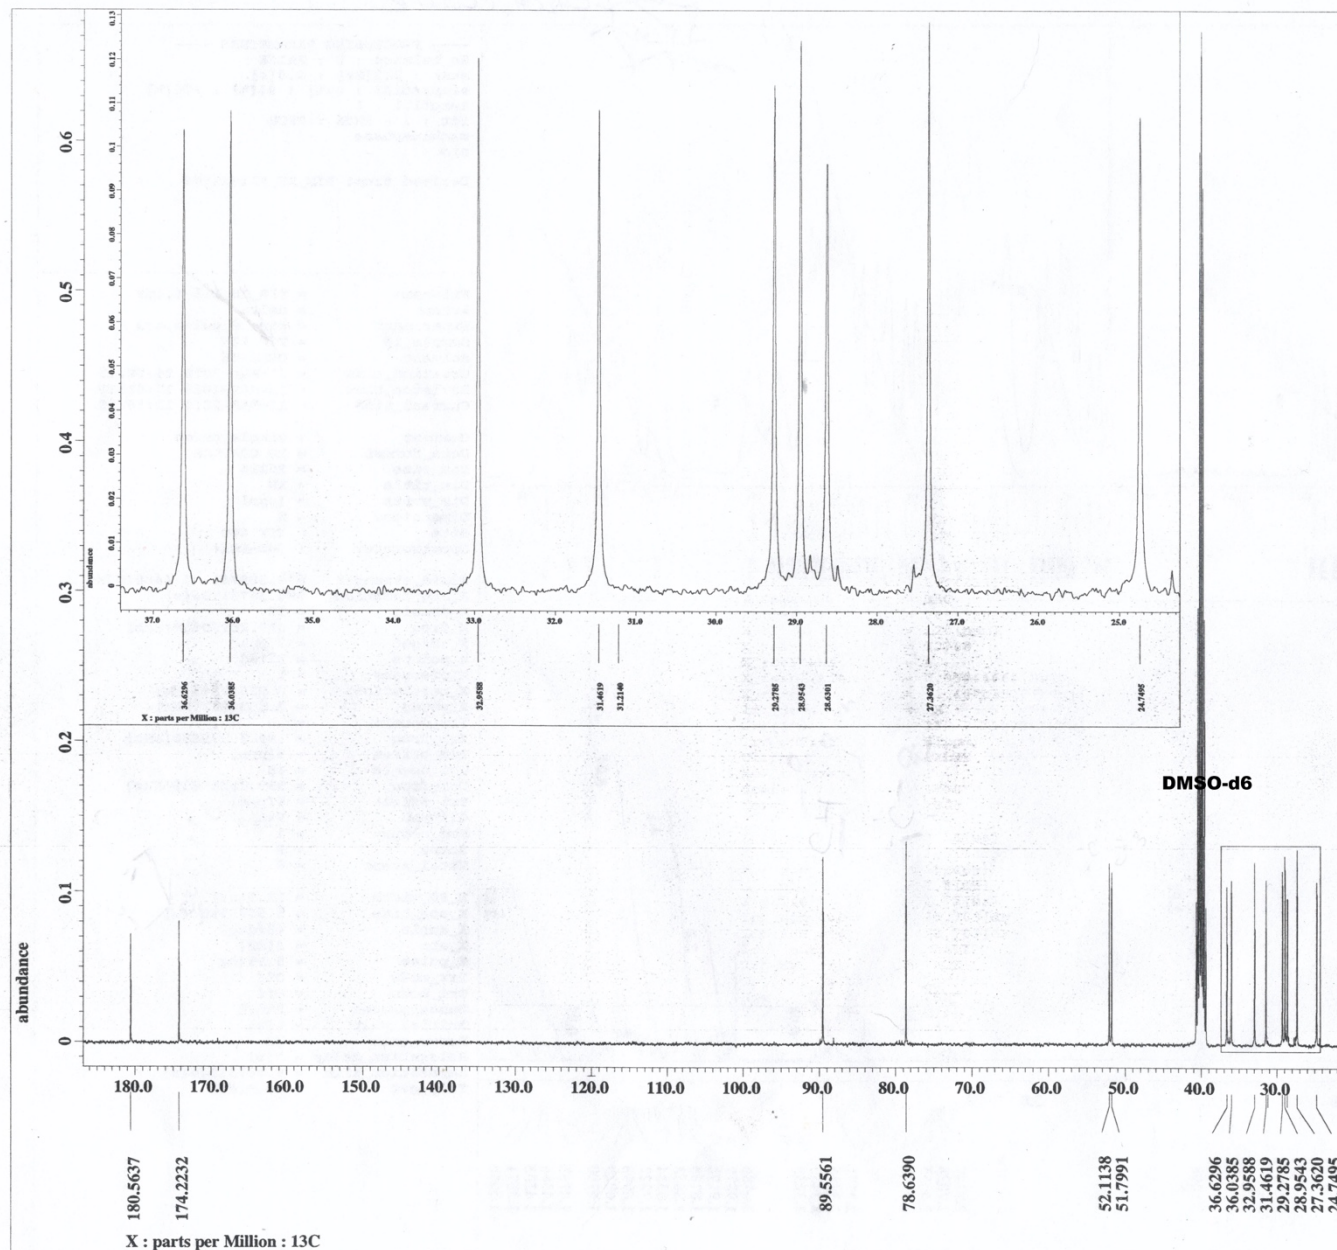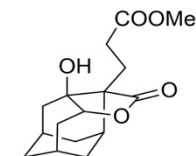

Filename = TIM\_13C\_116-4.jdf  
 Author = delta  
 Experiment = single\_pulse\_dec  
 Sample\_id = TIM\_116  
 Solvent = DMSO-D6  
 Creation\_time = 13-MAR-2018 04:53:30  
 Revision\_time = 13-MAR-2018 12:09:45  
 Current\_time = 13-MAR-2018 12:09:47

Comment = single pulse decouple  
 Data\_format = 1D COMPLEX  
 Dim\_size = 26214  
 Dim\_title = 13C  
 Dim\_units = [ppm]  
 Dimensions = X  
 Site = ECK 400  
 Spectrometer = JNM-ECK400

Field\_strength = 9.389766[T] (400[MHz])  
 X\_acq\_duration = 1.04333312[s]  
 X\_domain = 13C  
 X\_freq = 100.52530333[MHz]  
 X\_offset = 120[ppm]  
 X\_points = 32768  
 X\_prescans = 4  
 X\_resolution = 0.95846665[Hz]  
 X\_sweep = 31.40703518[kHz]  
 Irr\_domain = 1H  
 Irr\_freq = 399.78219838[MHz]  
 Irr\_offset = 5[ppm]  
 Clipped = FALSE  
 Mod\_return = 1  
 Scans = 1000  
 Total\_scans = 1000

X\_90\_width = 8.16[us]  
 X\_acq\_time = 1.04333312[s]  
 X\_angle = 30[deg]  
 X\_atn = 7.8[dB]  
 X\_pulse = 2.72[us]  
 Irr\_atn\_dec = 22.703[dB]  
 Irr\_atn\_noe = 22.703[dB]  
 Irr\_noise = WALTZ  
 Decoupling = TRUE  
 Initial\_wait = 1[s]  
 Noe = TRUE  
 Noe\_time = 2[s]  
 Recvr\_gain = 46  
 Relaxation\_delay = 2[s]  
 Repetition\_time = 3.04333312[s]  
 Temp\_get = 21.1[dC]

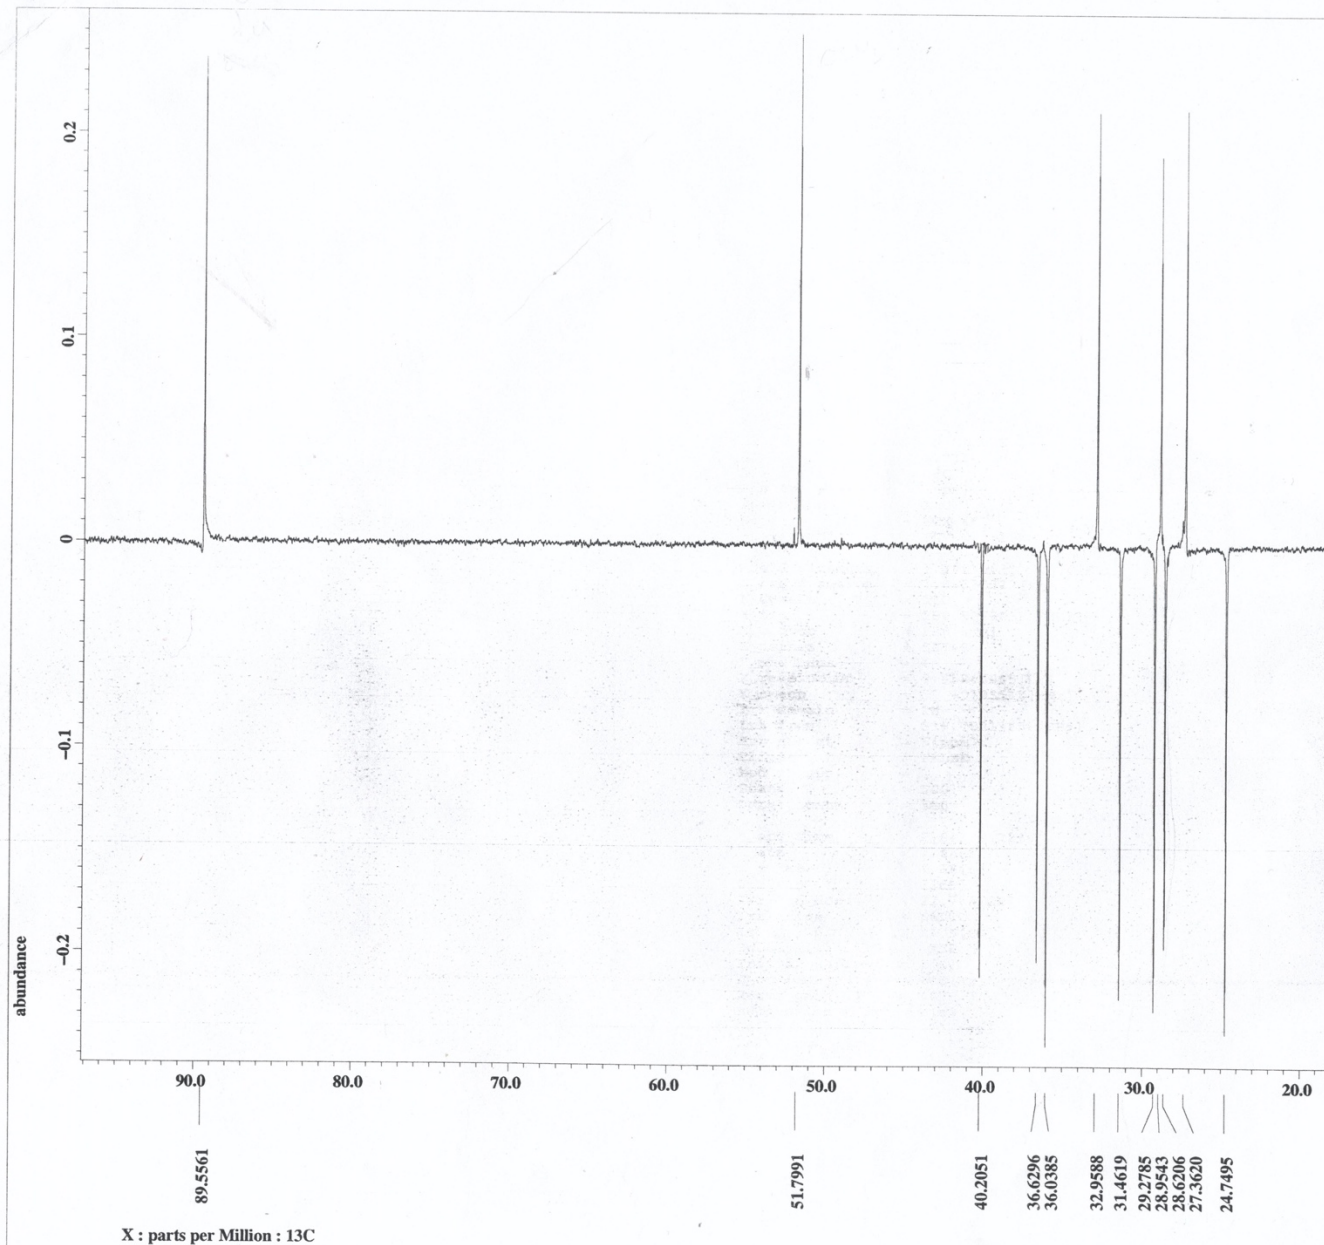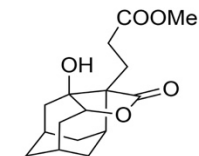

Filename = TIM\_DEPT135\_116-3.jdf  
 Author = delta  
 Experiment = dept.ex2  
 Sample\_id = TIM\_116  
 Solvent = DMSO-D6  
 Creation\_time = 13-MAR-2018 05:19:21  
 Revision\_time = 13-MAR-2018 12:09:55  
 Current\_time = 13-MAR-2018 12:10:11

Comment = DEPT with decoupling  
 Data\_format = 1D COMPLEX  
 Dim\_size = 26214  
 Dim\_title = 13c  
 Dim\_units = [ppm]  
 Dimensions = X  
 Site = ECX 400  
 Spectrometer = JNM-ECX400

Field\_strength = 9.389766[T] (400[MHz])  
 X\_acq\_duration = 1.04333312[s]  
 X\_domain = 13c  
 X\_freq = 100.52530333[MHz]  
 X\_offset = 120[ppm]  
 X\_points = 32768  
 X\_prescans = 4  
 X\_resolution = 0.95846665[Hz]  
 X\_sweep = 31.40703518[kHz]  
 Irr\_domain = 1H  
 Irr\_freq = 399.78219838[MHz]  
 Irr\_offset = 5[ppm]  
 Clipped = FALSE  
 Mod\_return = 1  
 Scans = 500  
 Total\_scans = 500

X\_acq\_time = 1.04333312[s]  
 X\_atn = 7.8[dB]  
 X\_pulse = 8.16[us]  
 Irr\_atn = 3[dB]  
 Irr\_atn\_dec = 22.703[dB]  
 Irr\_noise = WALTZ  
 Irr\_pulse = 11.9[us]  
 Decoupling = TRUE  
 Initial\_wait = 1[s]  
 J\_constant = 140[Hz]  
 Recvr\_gain = 46  
 Relaxation\_delay = 2[s]  
 Selection\_angle = 135[deg]  
 Selection\_pulse = 17.85[us]  
 Temp\_get = 21.3[degC]



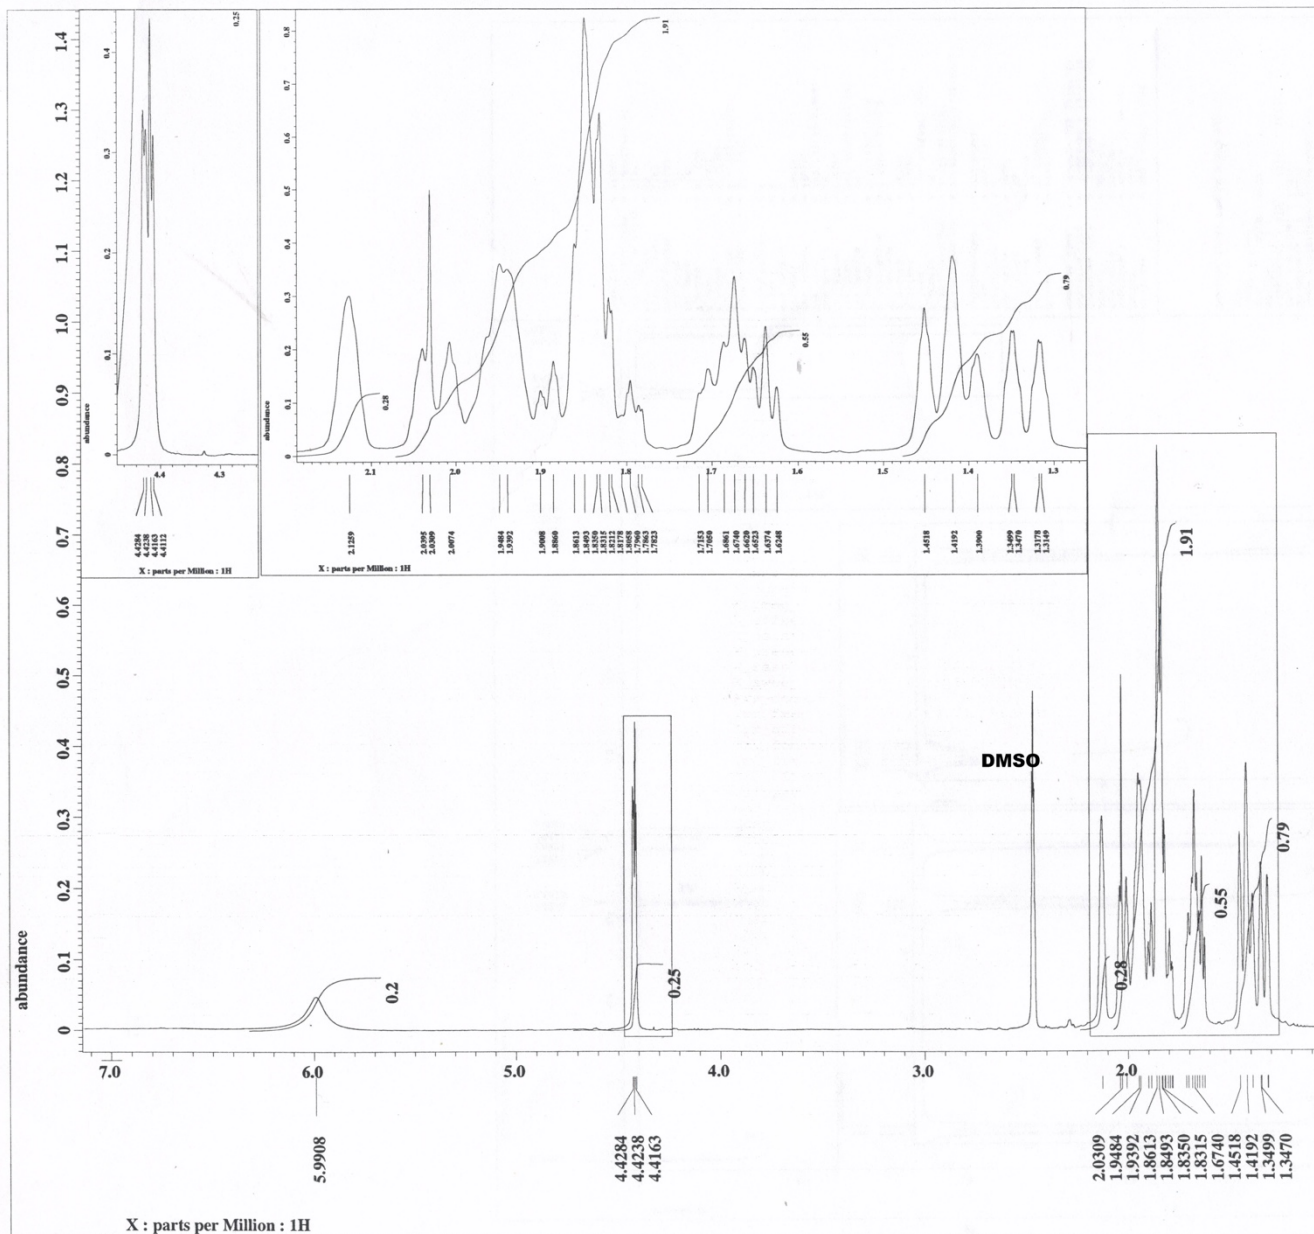

Filename = TIM\_1H\_149-4.jdf  
 Author = delta  
 Experiment = single\_pulse.ex2  
 Sample\_id = TIM\_149  
 Solvent = DMSO-D6  
 Creation\_time = 10-OCT-2018 22:25:28  
 Revision\_time = 11-OCT-2018 12:44:42  
 Current\_time = 11-OCT-2018 12:45:20

Comment = single\_pulse  
 Data\_format = 1D\_COMPLEX  
 Dim\_size = 26214  
 Dim\_title = 1H  
 Dim\_units = [ppm]  
 Dimensions = X  
 Site = ECK 400  
 Spectrometer = JNM-ECK400

Field\_strength = 9.389766[T] (400[MHz])  
 X\_acq\_duration = 4.36731904[s]  
 X\_domain = 1H  
 X\_freq = 399.78219838[MHz]  
 X\_offset = 7[ppm]  
 X\_points = 32768  
 X\_prescans = 1  
 X\_resolution = 0.22897343[Hz]  
 X\_sweep = 7.5030012[kHz]  
 Irr\_domain = 1H  
 Irr\_freq = 399.78219838[MHz]  
 Irr\_offset = 5[ppm]  
 Tri\_domain = 1H  
 Tri\_freq = 399.78219838[MHz]  
 Tri\_offset = 5[ppm]  
 Clipped = FALSE  
 Mod\_return = 1  
 Scans = 8  
 Total\_scans = 8

X\_90\_width = 11.9[us]  
 X\_acq\_time = 4.36731904[s]  
 X\_angle = 45[deg]  
 X\_atn = 3[dB]  
 X\_pulse = 5.95[us]  
 Irr\_mode = Off  
 Tri\_mode = Off  
 Dante\_presat = FALSE  
 Initial\_wait = 1[s]  
 Recvr\_gain = 34  
 Relaxation\_delay = 5[s]  
 Repetition\_time = 9.36731904[s]  
 Temp\_get = 22.6[degC]

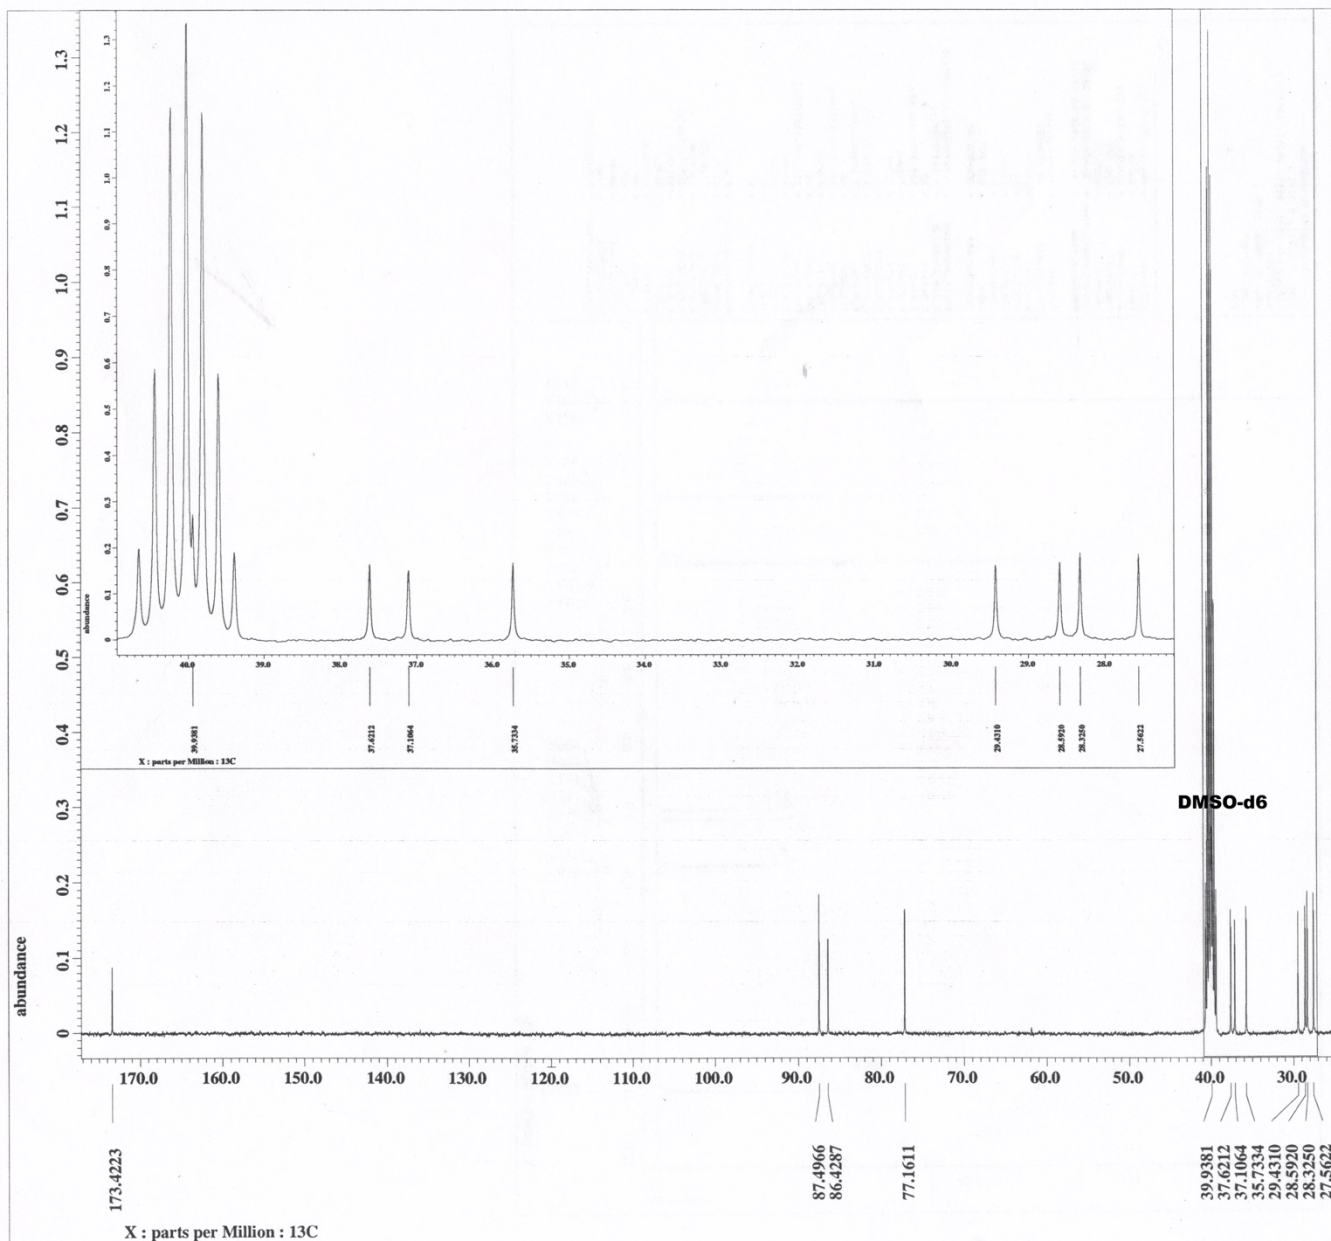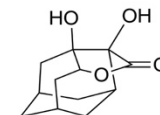

Filename = TIM\_13C\_149-4.jdf  
 Author = delta  
 Experiment = single\_pulse\_dec  
 Sample\_id = TIM\_149  
 Solvent = DMSO-D6  
 Creation\_time = 10-OCT-2018 23:16:41  
 Revision\_time = 11-OCT-2018 12:45:48  
 Current\_time = 11-OCT-2018 12:46:21

Comment = single pulse decouple  
 Data\_format = 1D COMPLEX  
 Dim\_size = 26214  
 Dim\_title = 13C  
 Dim\_units = [ppm]  
 Dimensions = X  
 Site = ECX 400  
 Spectrometer = JNM-ECX400

Field\_strength = 9.389766[T] (400 [MHz])  
 X\_acq\_duration = 1.04333312[s]  
 X\_domain = 13C  
 X\_freq = 100.52530333 [MHz]  
 X\_offset = 120 [ppm]  
 X\_points = 32768  
 X\_prescans = 1  
 X\_resolution = 0.95846665 [Hz]  
 X\_sweep = 31.40703518 [kHz]  
 Irr\_domain = 1H  
 Irr\_freq = 399.78219838 [MHz]  
 Irr\_offset = 5 [ppm]  
 Clipped = FALSE  
 Mod\_return = 1  
 Scans = 1000  
 Total\_scans = 1000

X\_90\_width = 8.16 [us]  
 X\_acq\_time = 1.04333312 [s]  
 X\_angle = 30 [deg]  
 X\_atn = 7.8 [dB]  
 K\_pulse = 2.72 [us]  
 Irr\_atn\_dec = 22.703 [dB]  
 Irr\_atn\_noe = 22.703 [dB]  
 Irr\_noise = WALTZ  
 Decoupling = TRUE  
 Initial\_wait = 1 [s]  
 Noe = TRUE  
 Noe\_time = 2 [s]  
 Recvr\_gain = 56  
 Relaxation\_delay = 2 [s]  
 Repetition\_time = 3.04333312 [s]  
 Temp\_get = 22.8 [dC]



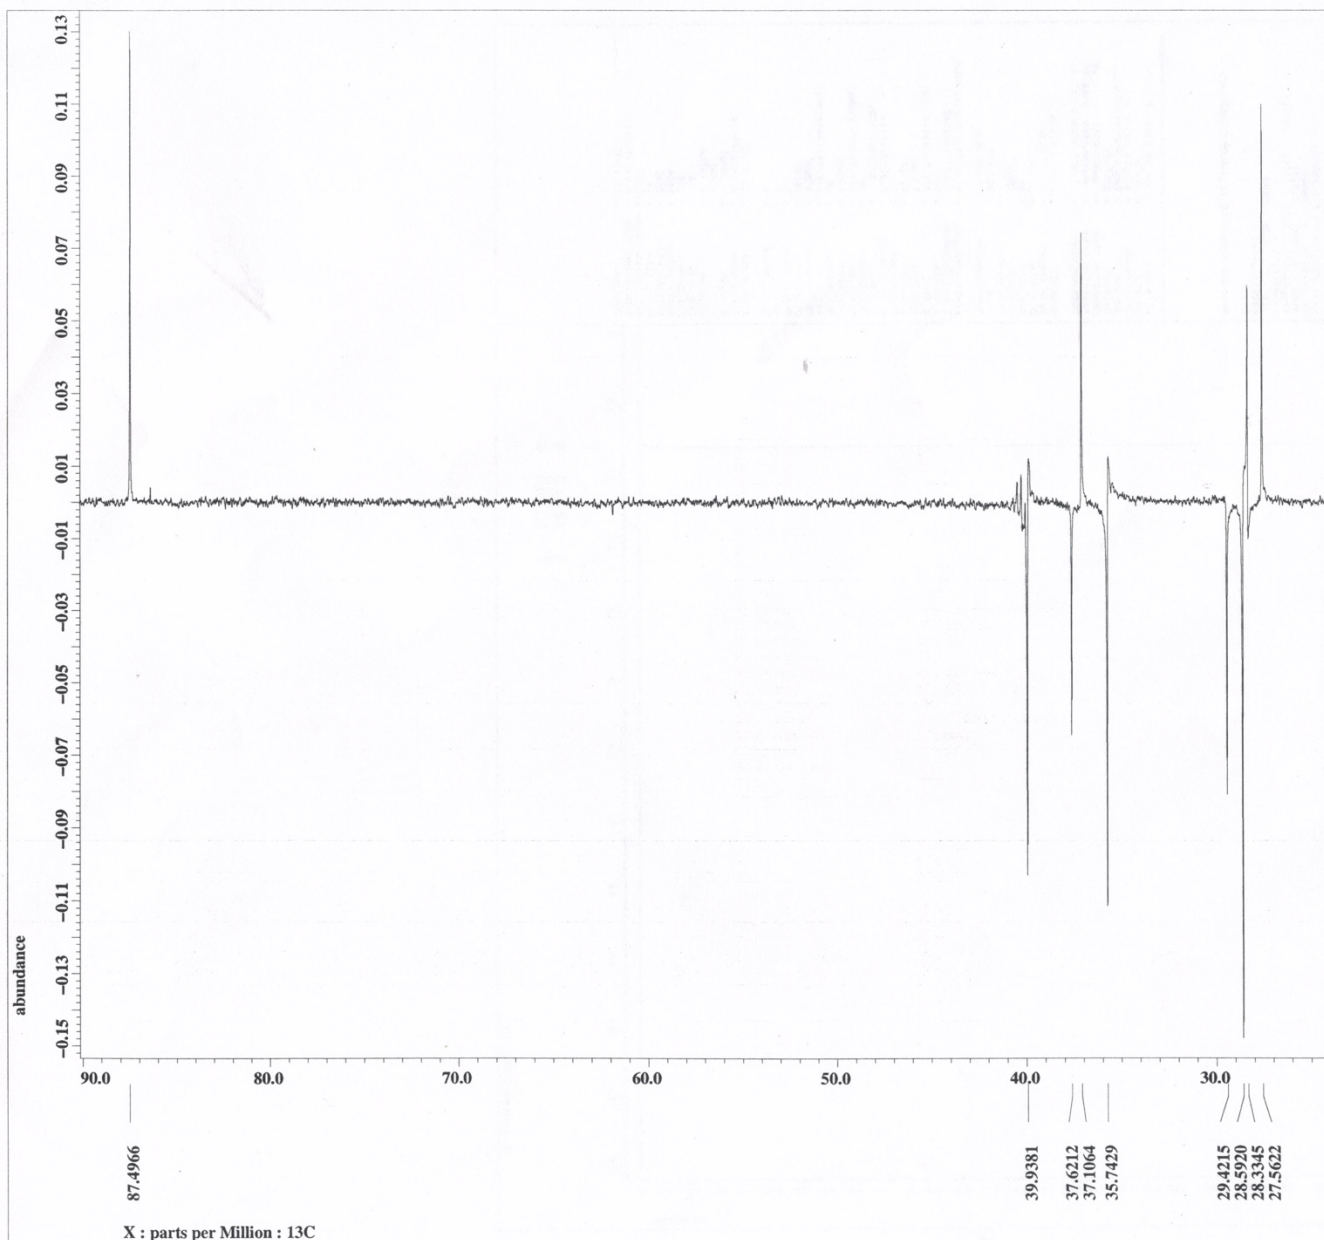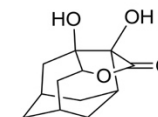

Filename = TIM\_DEPT135\_149-5.jdf  
 Author = delta  
 Experiment = dept.ex2  
 Sample\_id = TIM\_149  
 Solvent = DMSO-D6  
 Creation\_time = 10-OCT-2018 23:42:31  
 Revision\_time = 11-OCT-2018 12:46:32  
 Current\_time = 11-OCT-2018 12:46:36

Comment = DEPT with decoupling  
 Data\_format = 1D COMPLEX  
 Dim\_size = 26214  
 Dim\_title = 13C  
 Dim\_units = [ppm]  
 Dimensions = X  
 Site = ECX 400  
 Spectrometer = JNM-ECX400

Field\_strength = 9.389766[T] (400[MHz])  
 X\_acq\_duration = 1.04333312[s]  
 X\_domain = 13C  
 X\_freq = 100.52530333[MHz]  
 X\_offset = 120[ppm]  
 X\_points = 32768  
 X\_prescans = 4  
 X\_resolution = 0.95846665[Hz]  
 X\_sweep = 31.40703518[kHz]  
 Irr\_domain = 1H  
 Irr\_freq = 399.78219838[MHz]  
 Irr\_offset = 5[ppm]  
 Clipped = FALSE  
 Mod\_return = 1  
 Scans = 500  
 Total\_scans = 500

X\_acq\_time = 1.04333312[s]  
 X\_atn = 7.8[dB]  
 X\_pulse = 8.16[us]  
 Irr\_atn = 3[dB]  
 Irr\_atn\_dec = 22.703[dB]  
 Irr\_noise = WALTZ  
 Irr\_pulse = 11.9[us]  
 Decoupling = TRUE  
 Initial\_wait = 1[s]  
 J\_constant = 140[Hz]  
 Recvr\_gain = 46  
 Relaxation\_delay = 2[s]  
 Selection\_angle = 135[deg]  
 Selection\_pulse = 17.85[us]  
 Temp\_get = 22.7[degC]



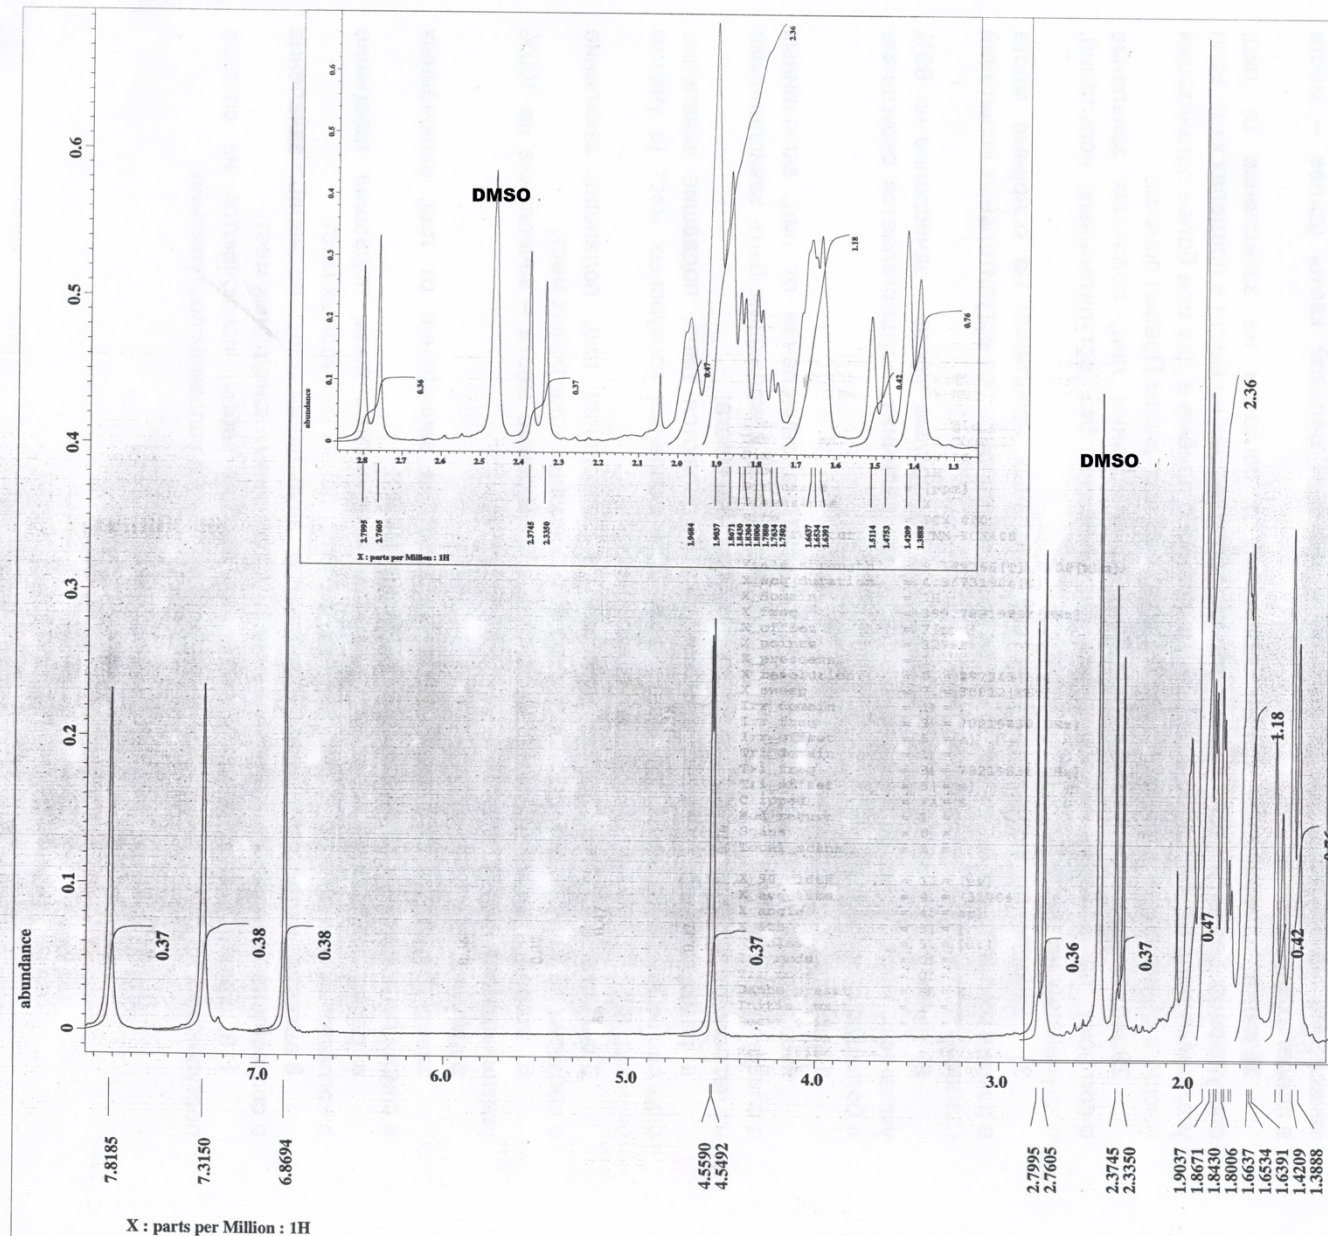



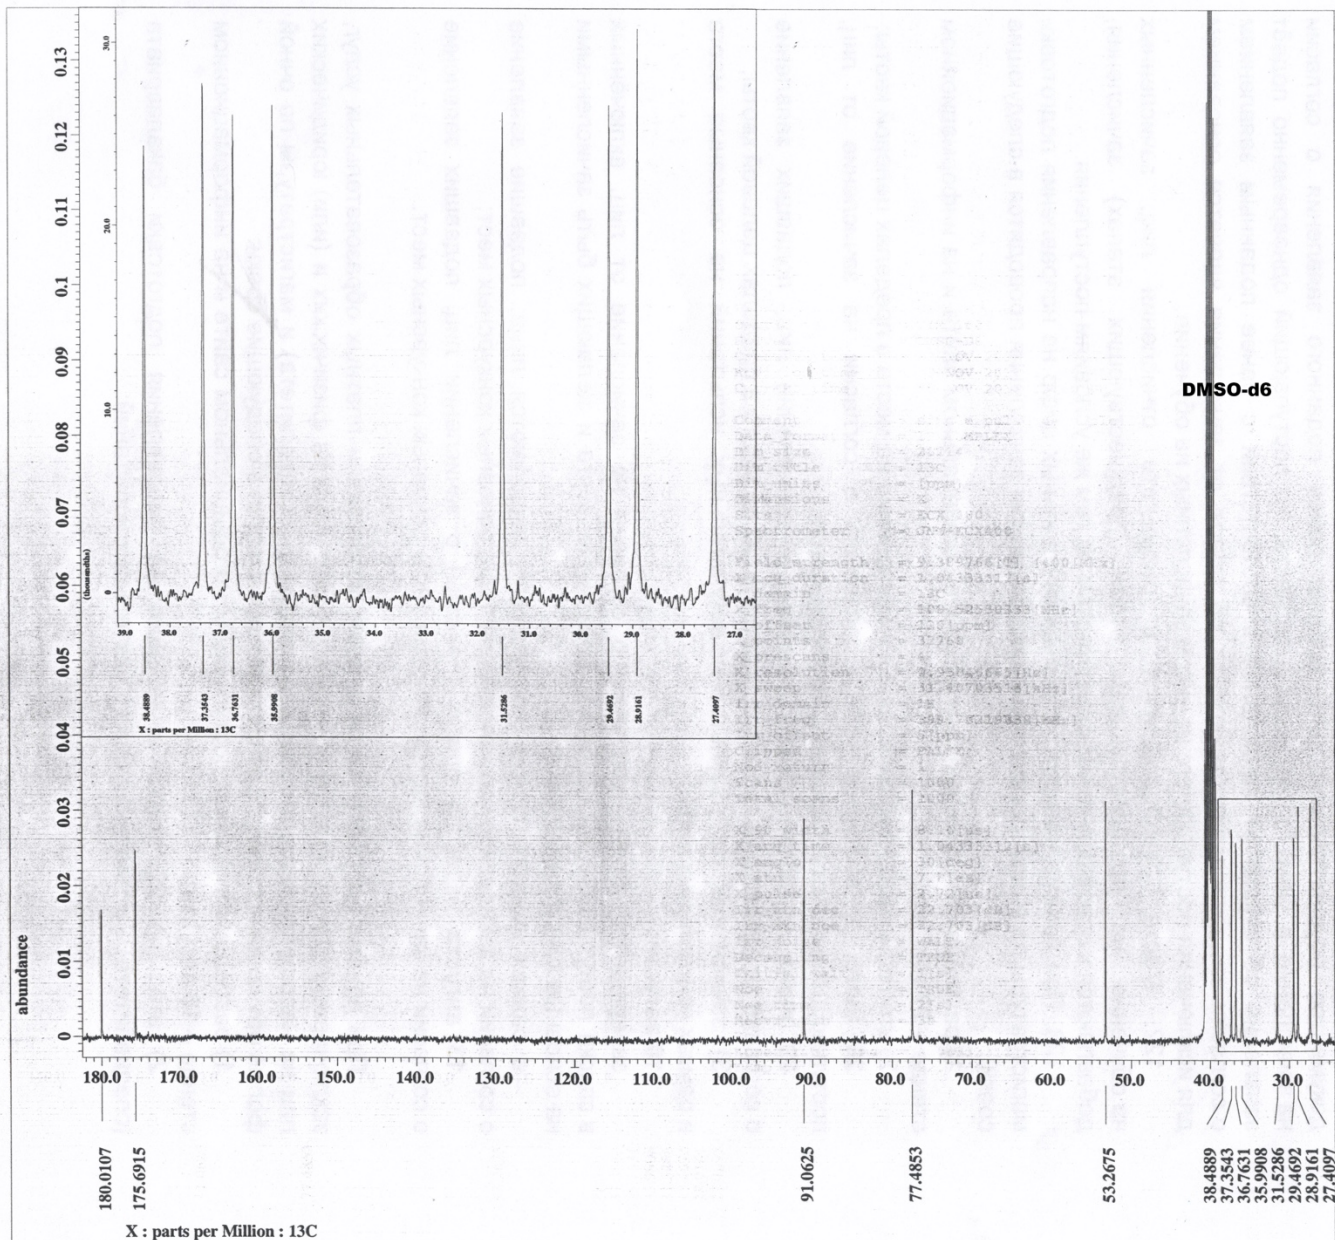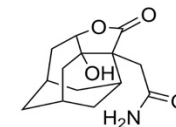

DMSO-d6

Filename = TIM\_13C\_163-3.jdf  
 Author = delta  
 Experiment = single\_pulse\_dec  
 Sample\_id = TIM\_163  
 Solvent = DMSO-D6  
 Creation\_time = 27-NOV-2018 17:59:27  
 Revision\_time = 28-NOV-2018 13:49:47  
 Current\_time = 28-NOV-2018 13:50:08

Comment = single pulse decouple  
 Data\_format = 1D COMPLEX  
 Dim\_size = 26214  
 Dim\_title = 13C  
 Dim\_units = [ppm]  
 Dimensions = X  
 Site = ECX 400  
 Spectrometer = JNM-ECX400

Field\_strength = 9.389766[T] (400[MHz])  
 X\_acq\_duration = 1.04333312[s]  
 X\_domain = 13C  
 X\_freq = 100.52530333[MHz]  
 X\_offset = 120[ppm]  
 X\_points = 32768  
 X\_prescans = 4  
 X\_resolution = 0.95846665[Hz]  
 X\_sweep = 31.40703518[kHz]  
 Irr\_domain = 1H  
 Irr\_freq = 399.78219838[MHz]  
 Irr\_offset = 5[ppm]  
 Clipped = FALSE  
 Mod\_return = 1  
 Scans = 1000  
 Total\_scans = 1000

X\_90\_width = 8.16[us]  
 X\_acq\_time = 1.04333312[s]  
 X\_angle = 30[deg]  
 X\_atn = 7.8[db]  
 X\_pulse = 2.72[us]  
 Irr\_atn\_dec = 22.703[db]  
 Irr\_atn\_noe = 22.703[db]  
 Irr\_noise = WALTZ  
 Decoupling = TRUE  
 Initial\_wait = 1[s]  
 Noe = TRUE  
 Noe\_time = 2[s]  
 Recvr\_gain = 38  
 Relaxation\_delay = 2[s]  
 Repetition\_time = 3.04333312[s]  
 Temp\_get = 22.7[dc]



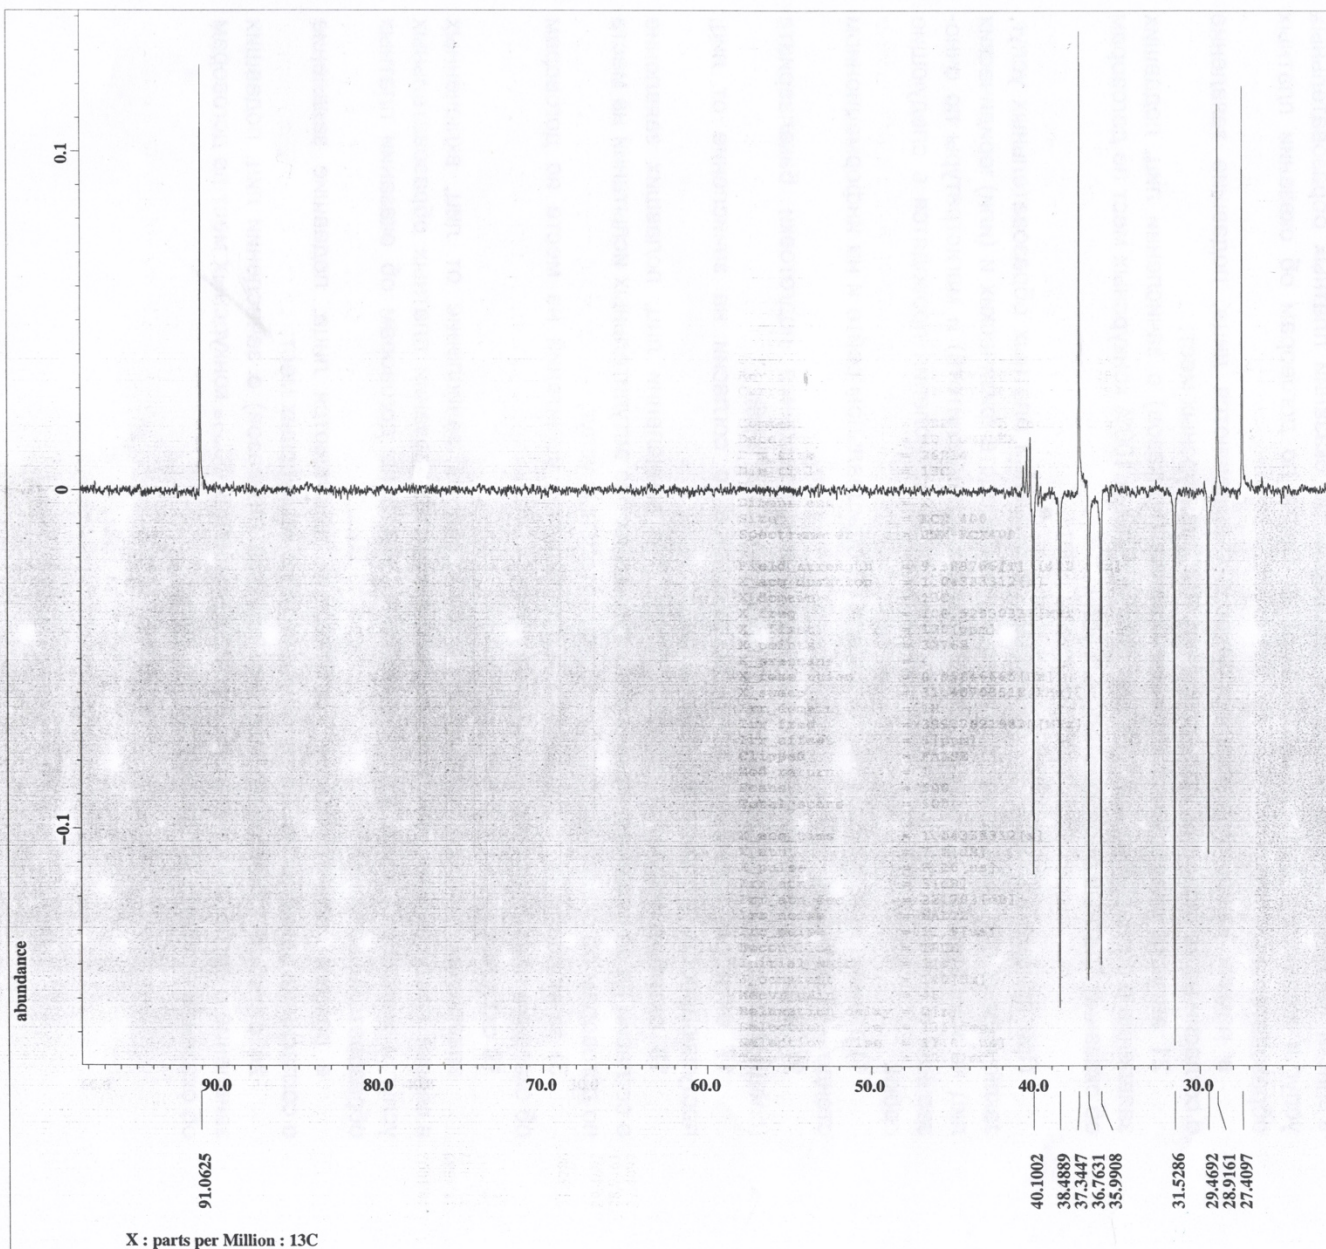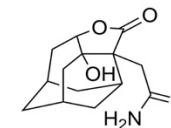

Filename = TIM\_DEPT135\_163-4.jdf  
Author = delta  
Experiment = dept.ex2  
Sample\_id = TIM\_163  
Solvent = DMSO-D6  
Creation\_time = 27-NOV-2018 18:25:14  
Revision\_time = 28-NOV-2018 13:50:28  
Current\_time = 28-NOV-2018 13:50:29

Comment = DEPT with decoupling  
Data\_format = 1D COMPLEX  
Dim\_size = 26214  
Dim\_title = 13C  
Dim\_units = [ppm]  
Dimensions = X  
Site = ECX 400  
Spectrometer = JNM-ECX400

Field\_strength = 9.389766[T] (400[MHz])  
X\_acq\_duration = 1.04333312[s]  
X\_domain = 13C  
X\_freq = 100.52530333[MHz]  
X\_offset = 120[ppm]  
X\_points = 32768  
X\_prescans = 4  
X\_resolution = 0.95846665[Hz]  
X\_sweep = 31.40703518[kHz]  
Irr\_domain = 1H  
Irr\_freq = 399.78219838[MHz]  
Irr\_offset = 5[ppm]  
Clipped = FALSE  
Mod\_return = 1  
Scans = 500  
Total\_scans = 500

X\_acq\_time = 1.04333312[s]  
X\_atn = 7.8[dB]  
X\_pulse = 8.16[us]  
Irr\_atn = 3[dB]  
Irr\_atn\_dec = 22.703[dB]  
Irr\_noise = WALTZ  
Irr\_pulse = 11.9[us]  
Decoupling = TRUE  
Initial\_wait = 1[s]  
J\_constant = 140[Hz]  
Recvr\_gain = 46  
Relaxation\_delay = 2[s]  
Selection\_angle = 135[deg]  
Selection\_pulse = 17.85[us]  
Temp\_get = 22.8[degC]



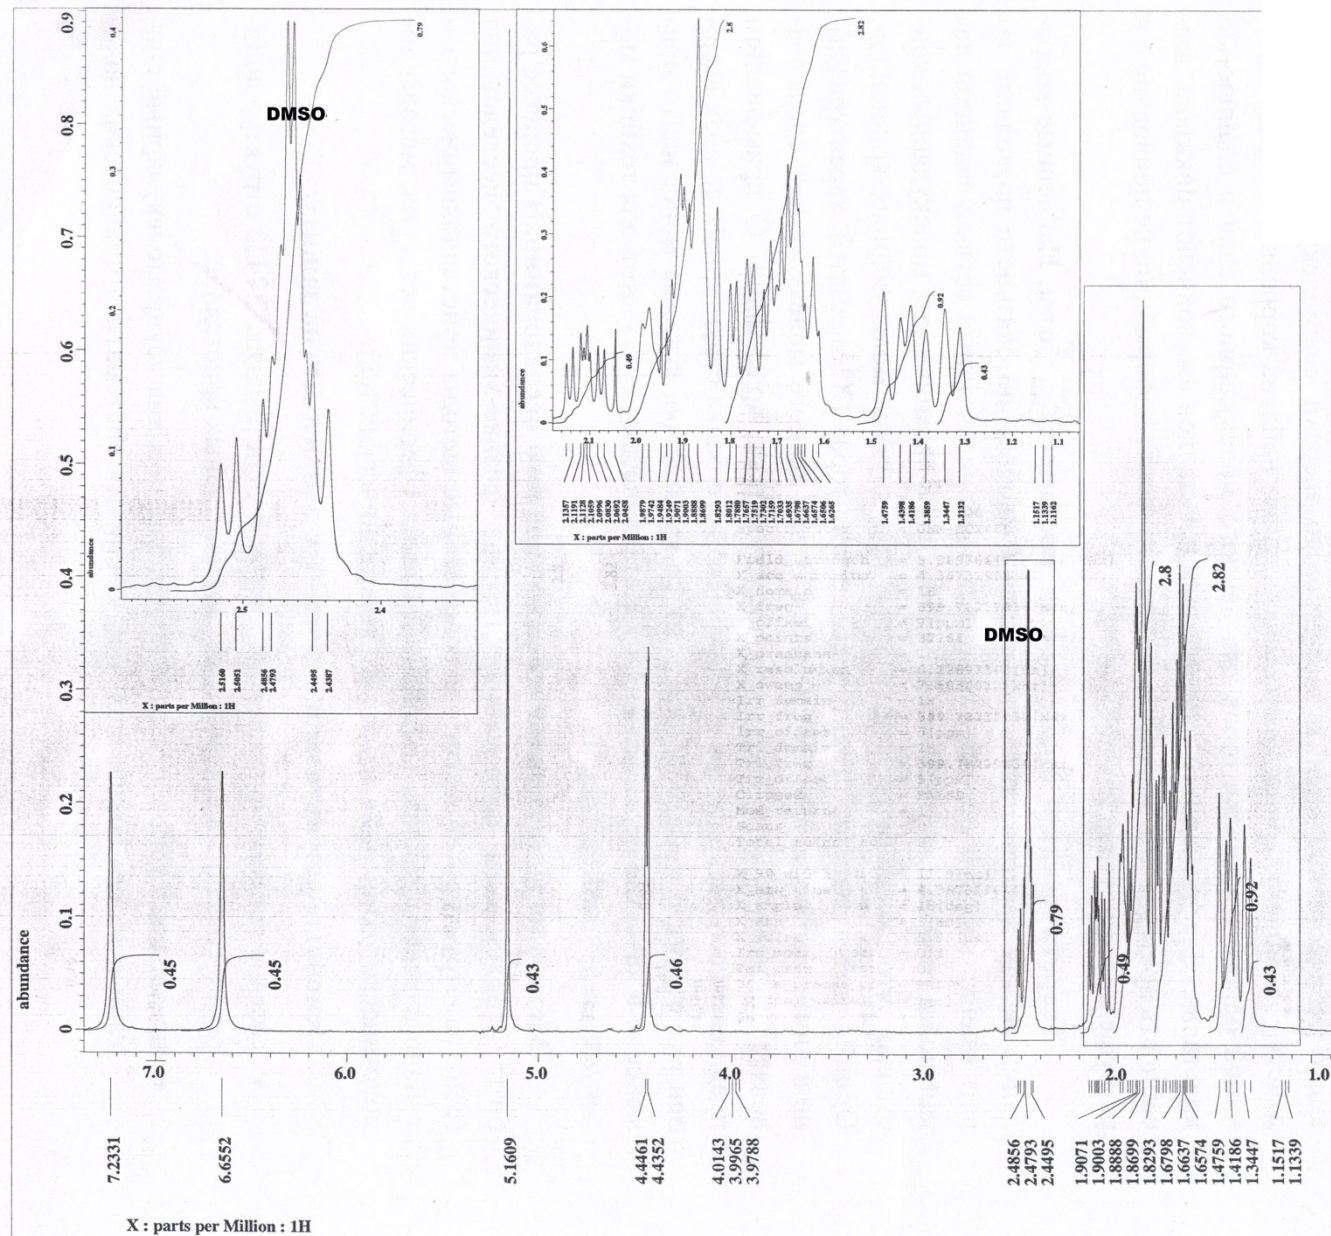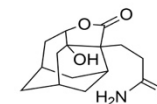

Filename = TIM\_1H\_160-4.jdf  
 Author = delta  
 Experiment = single\_pulse.ex2  
 Sample\_id = TIM\_160  
 Solvent = DMSO-D6  
 Creation\_time = 21-NOV-2018 13:56:29  
 Revision\_time = 21-NOV-2018 15:48:44  
 Current\_time = 21-NOV-2018 15:49:36

Comment = single\_pulse  
 Data\_format = 1D COMPLEX  
 Dim\_size = 26214  
 Dim\_title = 1H  
 Dim\_units = [ppm]  
 Dimensions = X  
 Site = ECX 400  
 Spectrometer = JNM-ECX400

Field\_strength = 9.389766[T] (400[MHz])  
 X\_acq\_duration = 4.36731904[s]  
 X\_domain = 1H  
 X\_freq = 399.78219838[MHz]  
 X\_offset = 7[ppm]  
 X\_points = 32768  
 X\_prescans = 1  
 X\_resolution = 0.22897343[Hz]  
 X\_sweep = 7.5030012[kHz]  
 Irr\_domain = 1H  
 Irr\_freq = 399.78219838[MHz]  
 Irr\_offset = 5[ppm]  
 Tri\_domain = 1H  
 Tri\_freq = 399.78219838[MHz]  
 Tri\_offset = 5[ppm]  
 Clipped = FALSE  
 Mod\_return = 1  
 Scans = 8  
 Total\_scans = 8

X\_90\_width = 11.9[us]  
 X\_acq\_time = 4.36731904[s]  
 X\_angle = 45[deg]  
 X\_atn = 3[db]  
 X\_pulse = 5.95[us]  
 Irr\_mode = Off  
 Tri\_mode = Off  
 Dante\_preset = FALSE  
 Initial\_wait = 1[s]  
 Recvr\_gain = 32  
 Relaxation\_delay = 5[s]  
 Repetition\_time = 9.36731904[s]  
 Temp\_get = 21.8[dc]







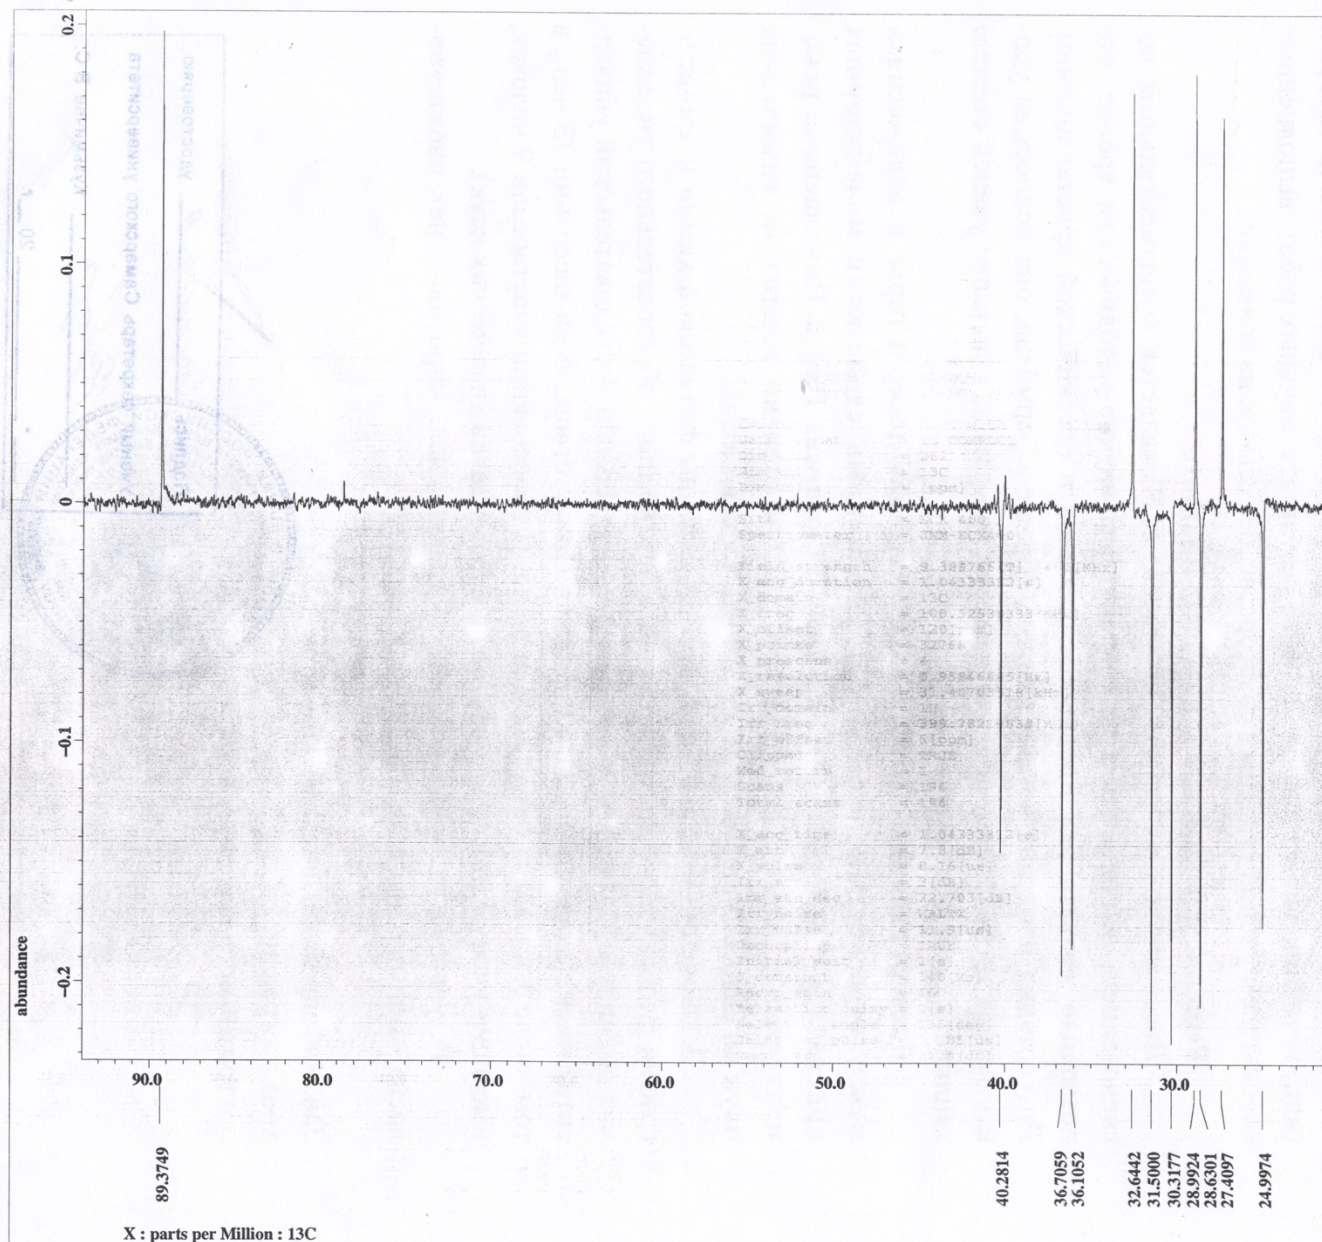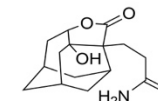

Filename = TIM\_DEPT135\_160-5.jdf  
Author = delta  
Experiment = dept.ex2  
Sample\_id = TIM\_160  
Solvent = DMSO-D6  
Creation\_time = 21-NOV-2018 15:00:14  
Revision\_time = 21-NOV-2018 15:49:57  
Current\_time = 21-NOV-2018 15:50:25

Comment = DEPT with decoupling  
Data\_format = 1D COMPLEX  
Dim\_size = 26214  
Dim\_title = 13C  
Dim\_units = [ppm]  
Dimensions = X  
Site = ECX 400  
Spectrometer = JNM-ECX400

Field\_strength = 9.399766 [T] (400 [MHz])  
X\_acq\_duration = 1.0433312 [s]  
X\_domain = 13C  
X\_freq = 100.52530333 [MHz]  
X\_offset = 120 [ppm]  
X\_points = 32768  
X\_prescans = 4  
X\_resolution = 0.95846665 [Hz]  
X\_sweep = 31.40703518 [kHz]  
Irr\_domain = 1H  
Irr\_freq = 399.78219838 [MHz]  
Irr\_offset = 5 [ppm]  
Clipped = TRUE  
Mod\_return = 1  
Scans = 196  
Total\_scans = 196

X\_acq\_time = 1.0433312 [s]  
X\_atn = 7.8 [dB]  
X\_pulse = 8.16 [us]  
Irr\_atn = 3 [dB]  
Irr\_atn\_dec = 22.703 [dB]  
Irr\_noise = WALTZ  
Irr\_pulse = 11.9 [us]  
Decoupling = TRUE  
Initial\_wait = 1 [s]  
J\_constant = 140 [Hz]  
Recvr\_gain = 46  
Relaxation\_delay = 2 [s]  
Selection\_angle = 135 [deg]  
Selection\_pulse = 17.85 [us]  
Temp\_get = 21.9 [degC]

## Optimisation of key syntheses.

**Optimization table 1** for alkylation with ethyl bromoacetate: 0.5 g of ketoester **1**, 1.1 eq of ethyl bromoacetate (0.26 ml), 1.1 eq (0.93 g) of sodium hydride 60% in oil. Stirring for 24 h in screw top vessel under argon. To prevent product contamination, commercial sodium hydride was washed with hexane before use.

| Solvent/time | Et <sub>2</sub> O | THF | Dioxane |
|--------------|-------------------|-----|---------|
| Yield, %     | 72                | 84  | 84      |

**Optimization table 2** for Michael reaction conditions: 0.5 g of ketoester **1**, 5 eq of Michael acceptor, 2.5 eq (0.73 g) of K<sub>2</sub>CO<sub>3</sub>, with stirring. [Time; yield, %]

| Solvent/t, °C<br>Michael acceptor | Acetonitrile<br>, 25 °C | Acetonitrile,<br>50 °C | Acetone,<br>25 °C | Acetone,<br>50 °C | DMF, 25 °C | DMF, 50 °C | DMF, 80<br>°C | Acetone, 50 °C,<br>with sonication |
|-----------------------------------|-------------------------|------------------------|-------------------|-------------------|------------|------------|---------------|------------------------------------|
| Acrylonitrile                     | 84 h; 20%               | 84 h; 43%              | 84 h; 34%         | 84 h; 60%         | 84 h; 32%  | 84 h; 68%  | 84 h; 53%     | >60 h; 72%                         |
| Methylacrylate                    | 84 h; 28%               | 84 h; 73%              | 84 h; 32%         | 84 h; 68%         | 84 h; 40%  | 84 h; 70%  | 84 h; 68%     | >60 h; 78%                         |
